# Supplementary material for: Oxaliplatin resistance in colorectal cancer enhances TRAIL sensitivity via death receptor 4 upregulation and lipid raft localization
Source: eLife. 2021 Aug 3;10:e67750. doi: 10.7554/eLife.67750 (PMC8331188; doi:10.7554/eLife.67750)
Supplement: Figure 1—figure supplement 1—source data 1. [file elife-67750-fig1-figsupp1-data1.xlsx]

## Sheet: T1 HT29P
	Absorbance Data															Plate Layout (Concentration of Oxali in uM)
		1	2	3	4	5	6	7	8	9	10	11	12				1	2	3	4	5	6	7	8	9	10	11	12
	A	0.167	0.233	0.205	0.162	0.199	0.108	0.157	0.113	0.132	0.085	0.141	0.099	590		A	0	0	0	0.1	0.1	0.1	0.5	0.5	0.5	1	1	1
	B	0.123	0.124	0.09	0.095	0.104	0.086	0.103	0.074	0.108	0.046	0.046	0.039	590		B	5	5	5	10	10	10	20	20	20	100	100	100
	C	0.04	0.038	0.047	0.048	0.049	0.048	0.046	0.047	0.047	0.048	0.048	0.041	590		C	200	200	200
	D	0.182	0.259	0.212	0.213	0.19	0.177	0.174	0.154	0.162	0.118	0.128	0.133	590		D	0	0	0	0.1	0.1	0.1	0.5	0.5	0.5	1	1	1
	E	0.14	0.126	0.123	0.135	0.12	0.191	0.115	0.165	0.126	0.047	0.04	0.049	590		E	5	5	5	10	10	10	20	20	20	100	100	100
	F	0.038	0.047	0.05	0.048	0.047	0.043	0.048	0.048	0.048	0.047	0.041	0.046	590		F	200	200	200
	G	0.042	0.048	0.048	0.047	0.048	0.041	0.043	0.049	0.048	0.047	0.043	0.044	590		G
	H	0.041	0.042	0.043	0.041	0.042	0.044	0.042	0.049	0.047	0.048	0.043	0.047	590		H	Bkgrnd	Bkgrnd	Bkgrnd
avg (empty)		Background subtraction
0.042		0.125	0.191	0.163	0.12	0.157	0.066	0.115	0.071	0.09	0.043	0.099	0.057
		0.081	0.082	0.048	0.053	0.062	0.044	0.061	0.032	0.066	0.004	0.004	-0.003
		-0.002	-0.004	0.005	0.006	0.007	0.006	0.004	0.005	0.005	0.006	0.006	-0.001
		0.14	0.217	0.17	0.171	0.148	0.135	0.132	0.112	0.12	0.076	0.086	0.091
		0.098	0.084	0.081	0.093	0.078	0.149	0.073	0.123	0.084	0.005	-0.002	0.007
		-0.004	0.005	0.008	0.006	0.005	0.001	0.006	0.006	0.006	0.005	-0.001	0.004
		0	0.006	0.006	0.005	0.006	-0.001	0.001	0.007	0.006	0.005	0.001	0.002
		-0.001	0	0.001	-0.001	0	0.002	0	0.007	0.005	0.006	0.001	0.005
				Normalized to Untreated
		uM				mean	sd
T1	avg (0)	0	0.782881	1.19624	1.02088	1	0.20747
	0.159667	0.1	0.751566	0.983299	0.413361	0.716075	0.286621
		0.5	0.720251	0.444676	0.563674	0.5762	0.138213
		1	0.269311	0.620042	0.356994	0.415449	0.182526
		5	0.507307	0.51357	0.300626	0.440501	0.121176
		10	0.331942	0.388309	0.275574	0.331942	0.0563674
		20	0.382046	0.200418	0.413361	0.331942	0.114974
		100	0.0250522	0.0250522	-0.0187891	0.0104384	0.0253118
		200	-0.0125261	-0.0250522	0.0313152	-0.00208768	0.029598
T2	avg (0)	0	0.796964	1.23529	0.967742	1	0.220938
	0.175667	0.1	0.973435	0.842505	0.768501	0.86148	0.103776
		0.5	0.751423	0.637571	0.683112	0.690702	0.0573042
		1	0.432638	0.489564	0.518027	0.480076	0.0434779
		5	0.557875	0.478178	0.461101	0.499051	0.0516533
		10	0.529412	0.444023	0.848197	0.607211	0.213023
		20	0.41556	0.70019	0.478178	0.531309	0.149568
		100	0.028463	-0.0113852	0.0398482	0.0189753	0.0269022
		200	-0.0227704	0.028463	0.0455408	0.0170778	0.0355503

## Sheet: T2 HT29P
																Plate Layout (Concentration of Oxali in uM)
		1	2	3	4	5	6	7	8	9	10	11	12				1	2	3	4	5	6	7	8	9	10	11	12
	A	0.15	0.188	0.208	0.286	0.23	0.192	0.204	0.216	0.205	0.197	0.144	0.138	590		A	0	0	0	0.1	0.1	0.1	0.5	0.5	0.5	1	1	1
	B	0.106	0.089	0.102	0.082	0.136	0.077	0.093	0.092	0.1	0.046	0.054	0.041	590		B	5	5	5	10	10	10	20	20	20	100	100	100
	C	0.04	0.039	0.045	0.048	0.049	0.049	0.047	0.047	0.048	0.048	0.05	0.04	590		C	200	200	200
	D	0.235	0.145	0.262	0.255	0.158	0.218	0.123	0.16	0.127	0.095	0.128	0.113	590		D	0	0	0	0.1	0.1	0.1	0.5	0.5	0.5	1	1	1
	E	0.074	0.066	0.056	0.063	0.063	0.109	0.061	0.152	0.176	0.05	0.037	0.048	590		E	5	5	5	10	10	10	20	20	20	100	100	100
	F	0.042	0.046	0.048	0.048	0.047	0.044	0.049	0.049	0.048	0.047	0.041	0.046	590		F	200	200	200
	G	0.041	0.048	0.047	0.047	0.047	0.041	0.044	0.049	0.049	0.047	0.042	0.043	590		G
	H	0.041	0.042	0.043	0.042	0.042	0.044	0.042	0.049	0.048	0.047	0.045	0.047	590		H	Bkgrnd	Bkgrnd	Bkgrnd
avg (empty)		adjusted
0.042		0.108	0.146	0.166	0.244	0.188	0.15	0.162	0.174	0.163	0.155	0.102	0.096
		0.064	0.047	0.06	0.04	0.094	0.035	0.051	0.05	0.058	0.004	0.012	-0.001
		-0.002	-0.003	0.003	0.006	0.007	0.007	0.005	0.005	0.006	0.006	0.008	-0.002
		0.193	0.103	0.22	0.213	0.116	0.176	0.081	0.118	0.085	0.053	0.086	0.071
		0.032	0.024	0.014	0.021	0.021	0.067	0.019	0.11	0.134	0.008	-0.005	0.006
		0	0.004	0.006	0.006	0.005	0.002	0.007	0.007	0.006	0.005	-0.001	0.004
		-0.001	0.006	0.005	0.005	0.005	-0.001	0.002	0.007	0.007	0.005	0	0.001
		-0.001	0	0.001	0	0	0.002	0	0.007	0.006	0.005	0.003	0.005
						mean	sd
T1	avg (0)	0	0.771429	1.04286	1.18571	1	0.210442
	0.14	0.1	1.74286	1.34286	1.07143	1.38571	0.33776
		0.5	1.15714	1.24286	1.16429	1.1881	0.0475595
		1	1.10714	0.728571	0.685714	0.840476	0.231932
		5	0.457143	0.335714	0.428571	0.407143	0.0634871
		10	0.285714	0.671429	0.25	0.402381	0.233685
		20	0.364286	0.357143	0.414286	0.378571	0.031135
		100	0.0285714	0.0857143	-0.00714286	0.0357143	0.0468388
		200	-0.0142857	-0.0214286	0.0214286	-0.0047619	0.0229611
T2	avg (0)	0	1.12209	0.598837	1.27907	1	0.356173
	0.172	0.1	1.23837	0.674419	1.02326	0.978682	0.284607
		0.5	0.47093	0.686047	0.494186	0.550388	0.118058
		1	0.30814	0.5	0.412791	0.406977	0.0960623
		5	0.186047	0.139535	0.0813953	0.135659	0.0524331
		10	0.122093	0.122093	0.389535	0.21124	0.154408
		20	0.110465	0.639535	0.77907	0.50969	0.352708
		100	0.0465116	-0.0290698	0.0348837	0.0174419	0.0406977
		200	0	0.0232558	0.0348837	0.0193798	0.0177619

## Sheet: T1 HT29OXR
																Plate Layout (Concentration of Oxali in uM)
		1	2	3	4	5	6	7	8	9	10	11	12				1	2	3	4	5	6	7	8	9	10	11	12
	A	0.291	0.311	0.432	0.532	0.435	0.446	0.511	0.538	0.445	0.619	0.699	0.396	590		A	0	0	0	0.1	0.1	0.1	0.5	0.5	0.5	1	1	1
	B	0.499	0.619	0.841	0.775	1.246	0.658	0.385	0.313	0.346	0.205	0.304	0.214	590		B	5	5	5	10	10	10	20	20	20	100	100	100
	C	0.133	0.103	0.108	0.048	0.048	0.048	0.045	0.046	0.047	0.049	0.048	0.042	590		C	200	200	200
	D	0.728	0.378	0.743	0.799	0.295	0.618	0.468	0.288	0.298	0.284	0.377	0.455	590		D	0	0	0	0.1	0.1	0.1	0.5	0.5	0.5	1	1	1
	E	0.669	0.935	0.747	0.899	0.914	0.551	0.3	0.276	0.3	0.23	0.337	0.247	590		E	5	5	5	10	10	10	20	20	20	100	100	100
	F	0.156	0.078	0.121	0.047	0.047	0.044	0.049	0.049	0.048	0.046	0.041	0.045	590		F	200	200	200
	G	0.042	0.048	0.041	0.047	0.047	0.042	0.042	0.049	0.048	0.047	0.045	0.046	590		G
	H	0.042	0.043	0.042	0.042	0.042	0.044	0.043	0.049	0.047	0.048	0.044	0.047	590		H	Bkgrnd	Bkgrnd	Bkgrnd
avg (empty)		adjusted
0.0423333		0.248667	0.268667	0.389667	0.489667	0.392667	0.403667	0.468667	0.495667	0.402667	0.576667	0.656667	0.353667
		0.456667	0.576667	0.798667	0.732667	1.20367	0.615667	0.342667	0.270667	0.303667	0.162667	0.261667	0.171667
		0.0906667	0.0606667	0.0656667	0.00566667	0.00566667	0.00566667	0.00266667	0.00366667	0.00466667	0.00666667	0.00566667	-0.000333333
		0.685667	0.335667	0.700667	0.756667	0.252667	0.575667	0.425667	0.245667	0.255667	0.241667	0.334667	0.412667
		0.626667	0.892667	0.704667	0.856667	0.871667	0.508667	0.257667	0.233667	0.257667	0.187667	0.294667	0.204667
		0.113667	0.0356667	0.0786667	0.00466667	0.00466667	0.00166667	0.00666667	0.00666667	0.00566667	0.00366667	-0.00133333	0.00266667
		-0.000333333	0.00566667	-0.00133333	0.00466667	0.00466667	-0.000333333	-0.000333333	0.00666667	0.00566667	0.00466667	0.00266667	0.00366667
		-0.000333333	0.000666667	-0.000333333	-0.000333333	-0.000333333	0.00166667	0.000666667	0.00666667	0.00466667	0.00566667	0.00166667	0.00466667
						mean	sd
T1	avg (0)	0	0.822492	0.888644	1.28886	1	0.252341
	0.302333	0.1	1.61963	1.29879	1.33517	1.41786	0.175677
		0.5	1.55017	1.63947	1.33186	1.50717	0.158248
		1	1.90739	2.172	1.16979	1.74972	0.519372
		5	1.51047	1.90739	2.64168	2.01985	0.573925
		10	2.42337	3.98126	2.03638	2.81367	1.02951
		20	1.13341	0.895259	1.00441	1.01103	0.119212
		100	0.538037	0.865491	0.567806	0.657111	0.181075
		200	0.29989	0.200662	0.2172	0.23925	0.0531624
T2	avg (0)	0	1.19454	0.584785	1.22067	1	0.359824
	0.574	0.1	1.31823	0.440186	1.0029	0.920441	0.444795
		0.5	0.74158	0.427991	0.445412	0.538328	0.176237
		1	0.421022	0.583043	0.718931	0.574332	0.149146
		5	1.09175	1.55517	1.22764	1.29152	0.23822
		10	1.49245	1.51858	0.886179	1.29907	0.357814
		20	0.448897	0.407085	0.448897	0.434959	0.0241401
		100	0.326945	0.513357	0.356562	0.398955	0.100175
		200	0.198026	0.062137	0.13705	0.132404	0.0680633

## Sheet: T2 HT29OXR
																Plate Layout (Concentration of Oxali in uM)
		1	2	3	4	5	6	7	8	9	10	11	12				1	2	3	4	5	6	7	8	9	10	11	12
	A	0.148	0.166	0.228	0.225	0.189	0.248	0.167	0.248	0.188	0.14	0.224	0.182	590		A	0	0	0	0.1	0.1	0.1	0.5	0.5	0.5	1	1	1
	B	0.252	0.361	0.29	0.307	0.289	0.24	0.237	0.233	0.167	0.128	0.114	0.136	590		B	5	5	5	10	10	10	20	20	20	100	100	100
	C	0.117	0.099	0.105	0.049	0.049	0.049	0.049	0.048	0.048	0.048	0.048	0.042	590		C	200	200	200
	D	0.212	0.34	0.315	0.226	0.213	0.205	0.29	0.308	0.253	0.226	0.279	0.21	590		D	0	0	0	0.1	0.1	0.1	0.5	0.5	0.5	1	1	1
	E	0.358	0.49	0.228	0.346	0.395	0.233	0.245	0.265	0.174	0.194	0.094	0.097	590		E	5	5	5	10	10	10	20	20	20	100	100	100
	F	0.171	0.102	0.087	0.047	0.047	0.044	0.048	0.049	0.047	0.047	0.041	0.046	590		F	200	200	200
	G	0.042	0.048	0.049	0.048	0.047	0.042	0.043	0.049	0.048	0.047	0.044	0.045	590		G
	H	0.041	0.042	0.042	0.042	0.044	0.043	0.042	0.049	0.047	0.048	0.043	0.047	590		H	Bkgrnd	Bkgrnd	Bkgrnd
avg (empty)		adjusted
0.0416667		0.106333	0.124333	0.186333	0.183333	0.147333	0.206333	0.125333	0.206333	0.146333	0.0983333	0.182333	0.140333
		0.210333	0.319333	0.248333	0.265333	0.247333	0.198333	0.195333	0.191333	0.125333	0.0863333	0.0723333	0.0943333
		0.0753333	0.0573333	0.0633333	0.00733333	0.00733333	0.00733333	0.00733333	0.00633333	0.00633333	0.00633333	0.00633333	0.000333333
		0.170333	0.298333	0.273333	0.184333	0.171333	0.163333	0.248333	0.266333	0.211333	0.184333	0.237333	0.168333
		0.316333	0.448333	0.186333	0.304333	0.353333	0.191333	0.203333	0.223333	0.132333	0.152333	0.0523333	0.0553333
		0.129333	0.0603333	0.0453333	0.00533333	0.00533333	0.00233333	0.00633333	0.00733333	0.00533333	0.00533333	-0.000666667	0.00433333
		0.000333333	0.00633333	0.00733333	0.00633333	0.00533333	0.000333333	0.00133333	0.00733333	0.00633333	0.00533333	0.00233333	0.00333333
		-0.000666667	0.000333333	0.000333333	0.000333333	0.00233333	0.00133333	0.000333333	0.00733333	0.00533333	0.00633333	0.00133333	0.00533333
						mean	sd
T1	avg (0)	0	0.764988	0.894484	1.34053	1	0.30193
	0.139	0.1	1.31894	1.05995	1.48441	1.28777	0.213941
		0.5	0.901679	1.48441	1.05276	1.14628	0.302415
		1	0.707434	1.31175	1.00959	1.00959	0.302158
		5	1.51319	2.29736	1.78657	1.86571	0.398031
		10	1.90887	1.77938	1.42686	1.70504	0.249458
		20	1.40528	1.3765	0.901679	1.22782	0.282811
		100	0.621103	0.520384	0.678657	0.606715	0.0801117
		200	0.541966	0.41247	0.455635	0.470024	0.0659363
T2	avg (0)	0	0.688679	1.2062	1.10512	1	0.274308
	0.247333	0.1	0.745283	0.692722	0.660377	0.699461	0.0428521
		0.5	1.00404	1.07682	0.854447	0.978437	0.113376
		1	0.745283	0.959569	0.680593	0.795148	0.14602
		5	1.27898	1.81267	0.753369	1.28167	0.529655
		10	1.23046	1.42857	0.773585	1.1442	0.335904
		20	0.822102	0.902965	0.53504	0.753369	0.193353
		100	0.615903	0.21159	0.22372	0.350404	0.230009
		200	0.522911	0.243935	0.183288	0.316712	0.18113

## Sheet: T1 SW480P
																Plate Layout (Concentration of Oxali in uM)
		1	2	3	4	5	6	7	8	9	10	11	12				1	2	3	4	5	6	7	8	9	10	11	12
	A	0.092	0.133	0.132	0.121	0.093	0.1	0.085	0.116	0.106	0.106	0.098	0.112	590		A	0	0	0	0.1	0.1	0.1	0.5	0.5	0.5	1	1	1
	B	0.079	0.09	0.094	0.099	0.096	0.089	0.072	0.084	0.079	0.063	0.066	0.098	590		B	5	5	5	10	10	10	20	20	20	100	100	100
	C	0.042	0.045	0.054	0.048	0.049	0.051	0.043	0.047	0.047	0.048	0.047	0.041	590		C	200	200	200
	D	0.11	0.067	0.09	0.093	0.087	0.09	0.084	0.098	0.092	0.086	0.076	0.085	590		D	0	0	0	0.1	0.1	0.1	0.5	0.5	0.5	1	1	1
	E	0.083	0.066	0.099	0.061	0.065	0.069	0.079	0.076	0.061	0.063	0.071	0.072	590		E	5	5	5	10	10	10	20	20	20	100	100	100
	F	0.041	0.047	0.056	0.047	0.047	0.04	0.048	0.048	0.048	0.045	0.042	0.046	590		F	200	200	200
	G	0.042	0.048	0.048	0.048	0.047	0.041	0.042	0.049	0.048	0.046	0.044	0.045	590		G
	H	0.041	0.043	0.042	0.041	0.042	0.042	0.042	0.05	0.047	0.048	0.042	0.047	590		H	Bkgrnd	Bkgrnd	Bkgrnd
avg (empty)		adjusted
0.042		0.05	0.091	0.09	0.079	0.051	0.058	0.043	0.074	0.064	0.064	0.056	0.07
		0.037	0.048	0.052	0.057	0.054	0.047	0.03	0.042	0.037	0.021	0.024	0.056
		0	0.003	0.012	0.006	0.007	0.009	0.001	0.005	0.005	0.006	0.005	-0.001
		0.068	0.025	0.048	0.051	0.045	0.048	0.042	0.056	0.05	0.044	0.034	0.043
		0.041	0.024	0.057	0.019	0.023	0.027	0.037	0.034	0.019	0.021	0.029	0.03
		-0.001	0.005	0.014	0.005	0.005	-0.002	0.006	0.006	0.006	0.003	0	0.004
		0	0.006	0.006	0.006	0.005	-0.001	0	0.007	0.006	0.004	0.002	0.003
		-0.001	0.001	0	-0.001	0	0	0	0.008	0.005	0.006	0	0.005
						mean	sd
T1	avg (0)	0	0.649351	1.18182	1.16883	1	0.303741
	0.077	0.1	1.02597	0.662338	0.753247	0.813853	0.189242
		0.5	0.558442	0.961039	0.831169	0.78355	0.20548
		1	0.831169	0.727273	0.909091	0.822511	0.0912178
		5	0.480519	0.623377	0.675325	0.593074	0.100876
		10	0.74026	0.701299	0.61039	0.683983	0.0666442
		20	0.38961	0.545455	0.480519	0.471861	0.078282
		100	0.272727	0.311688	0.727273	0.437229	0.251939
		200	0	0.038961	0.155844	0.0649351	0.0811039
T2	avg (0)	0	1.44681	0.531915	1.02128	1	0.457818
	0.047	0.1	1.08511	0.957447	1.02128	1.02128	0.0638298
		0.5	0.893617	1.19149	1.06383	1.04965	0.149442
		1	0.93617	0.723404	0.914894	0.858156	0.117182
		5	0.87234	0.510638	1.21277	0.865248	0.351118
		10	0.404255	0.489362	0.574468	0.489362	0.0851064
		20	0.787234	0.723404	0.404255	0.638298	0.205184
		100	0.446809	0.617021	0.638298	0.567376	0.104955
		200	-0.0212766	0.106383	0.297872	0.12766	0.160635

## Sheet: T2 SW480P
																Plate Layout (Concentration of Oxali in uM)
		1	2	3	4	5	6	7	8	9	10	11	12				1	2	3	4	5	6	7	8	9	10	11	12
	A	0.084	0.1	0.106	0.105	0.106	0.103	0.08	0.09	0.089	0.095	0.096	0.098	590		A	0	0	0	0.1	0.1	0.1	0.5	0.5	0.5	1	1	1
	B	0.09	0.086	0.095	0.078	0.086	0.096	0.072	0.061	0.062	0.064	0.068	0.053	590		B	5	5	5	10	10	10	20	20	20	100	100	100
	C	0.052	0.051	0.044	0.048	0.049	0.05	0.047	0.047	0.048	0.049	0.048	0.04	590		C	200	200	200
	D	0.084	0.079	0.075	0.093	0.093	0.091	0.086	0.073	0.092	0.083	0.083	0.057	590		D	0	0	0	0.1	0.1	0.1	0.5	0.5	0.5	1	1	1
	E	0.07	0.08	0.108	0.063	0.075	0.074	0.077	0.057	0.074	0.068	0.054	0.063	590		E	5	5	5	10	10	10	20	20	20	100	100	100
	F	0.05	0.053	0.052	0.047	0.047	0.043	0.048	0.049	0.048	0.046	0.041	0.046	590		F	200	200	200
	G	0.041	0.048	0.048	0.047	0.047	0.041	0.043	0.048	0.048	0.047	0.043	0.043	590		G
	H	0.04	0.042	0.042	0.041	0.043	0.043	0.042	0.048	0.047	0.047	0.044	0.046	590		H	Bkgrnd	Bkgrnd	Bkgrnd
avg (empty)		adjusted
0.0413333		0.0426667	0.0586667	0.0646667	0.0636667	0.0646667	0.0616667	0.0386667	0.0486667	0.0476667	0.0536667	0.0546667	0.0566667
		0.0486667	0.0446667	0.0536667	0.0366667	0.0446667	0.0546667	0.0306667	0.0196667	0.0206667	0.0226667	0.0266667	0.0116667
		0.0106667	0.00966667	0.00266667	0.00666667	0.00766667	0.00866667	0.00566667	0.00566667	0.00666667	0.00766667	0.00666667	-0.00133333
		0.0426667	0.0376667	0.0336667	0.0516667	0.0516667	0.0496667	0.0446667	0.0316667	0.0506667	0.0416667	0.0416667	0.0156667
		0.0286667	0.0386667	0.0666667	0.0216667	0.0336667	0.0326667	0.0356667	0.0156667	0.0326667	0.0266667	0.0126667	0.0216667
		0.00866667	0.0116667	0.0106667	0.00566667	0.00566667	0.00166667	0.00666667	0.00766667	0.00666667	0.00466667	-0.000333333	0.00466667
		-0.000333333	0.00666667	0.00666667	0.00566667	0.00566667	-0.000333333	0.00166667	0.00666667	0.00666667	0.00566667	0.00166667	0.00166667
		-0.00133333	0.000666667	0.000666667	-0.000333333	0.00166667	0.00166667	0.000666667	0.00666667	0.00566667	0.00566667	0.00266667	0.00466667
						mean	sd
T1	avg (0)	0	0.771084	1.06024	1.16867	1	0.205527
	0.0553333	0.1	1.1506	1.16867	1.11446	1.14458	0.0276059
		0.5	0.698795	0.879518	0.861446	0.813253	0.0995344
		1	0.96988	0.987952	1.0241	0.993976	0.0276059
		5	0.879518	0.807229	0.96988	0.885542	0.0814925
		10	0.662651	0.807229	0.987952	0.819277	0.162985
		20	0.554217	0.355422	0.373494	0.427711	0.109929
		100	0.409639	0.481928	0.210843	0.36747	0.140376
		200	0.192771	0.174699	0.0481928	0.138554	0.0787753
T2	avg (0)	0	1.12281	0.991228	0.885965	1	0.118664
	0.038	0.1	1.35965	1.35965	1.30702	1.34211	0.0303869
		0.5	1.17544	0.833333	1.33333	1.11404	0.255593
		1	1.09649	1.09649	0.412281	0.868421	0.395029
		5	0.754386	1.01754	1.75439	1.17544	0.518361
		10	0.570175	0.885965	0.859649	0.77193	0.175219
		20	0.938596	0.412281	0.859649	0.736842	0.283837
		100	0.701754	0.333333	0.570175	0.535088	0.1867
		200	0.22807	0.307018	0.280702	0.27193	0.040198

## Sheet: T1 SW480OXR
																Plate Layout (Concentration of Oxali in uM)
		1	2	3	4	5	6	7	8	9	10	11	12				1	2	3	4	5	6	7	8	9	10	11	12
	A	0.09	0.094	0.105	0.093	0.099	0.109	0.095	0.095	0.133	0.078	0.123	0.112	590		A	0	0	0	0.1	0.1	0.1	0.5	0.5	0.5	1	1	1
	B	0.099	0.088	0.102	0.071	0.099	0.074	0.099	0.077	0.096	0.077	0.078	0.08	590		B	5	5	5	10	10	10	20	20	20	100	100	100
	C	0.044	0.049	0.067	0.048	0.048	0.049	0.047	0.047	0.047	0.049	0.047	0.04	590		C	200	200	200
	D	0.075	0.07	0.088	0.1	0.071	0.124	0.103	0.081	0.085	0.095	0.09	0.071	590		D	0	0	0	0.1	0.1	0.1	0.5	0.5	0.5	1	1	1
	E	0.104	0.073	0.089	0.075	0.082	0.082	0.075	0.068	0.08	0.084	0.058	0.063	590		E	5	5	5	10	10	10	20	20	20	100	100	100
	F	0.043	0.05	0.083	0.048	0.047	0.046	0.047	0.049	0.048	0.046	0.041	0.045	590		F	200	200	200
	G	0.042	0.048	0.048	0.047	0.045	0.044	0.042	0.048	0.048	0.046	0.043	0.045	590		G
	H	0.041	0.042	0.043	0.041	0.043	0.043	0.043	0.048	0.047	0.048	0.043	0.047	590		H	Bkgrnd	Bkgrnd	Bkgrnd
avg (empty)		adjusted
0.042		0.048	0.052	0.063	0.051	0.057	0.067	0.053	0.053	0.091	0.036	0.081	0.07
		0.057	0.046	0.06	0.029	0.057	0.032	0.057	0.035	0.054	0.035	0.036	0.038
		0.002	0.007	0.025	0.006	0.006	0.007	0.005	0.005	0.005	0.007	0.005	-0.002
		0.033	0.028	0.046	0.058	0.029	0.082	0.061	0.039	0.043	0.053	0.048	0.029
		0.062	0.031	0.047	0.033	0.04	0.04	0.033	0.026	0.038	0.042	0.016	0.021
		0.001	0.008	0.041	0.006	0.005	0.004	0.005	0.007	0.006	0.004	-0.001	0.003
		0	0.006	0.006	0.005	0.003	0.002	0	0.006	0.006	0.004	0.001	0.003
		-0.001	0	0.001	-0.001	0.001	0.001	0.001	0.006	0.005	0.006	0.001	0.005
						mean	sd
T1	avg (0)	0	0.883436	0.957055	1.15951	1	0.142959
	0.0543333	0.1	0.93865	1.04908	1.23313	1.07362	0.148765
		0.5	0.97546	0.97546	1.67485	1.20859	0.403791
		1	0.662577	1.4908	1.28834	1.14724	0.431764
		5	1.04908	0.846626	1.10429	1	0.135665
		10	0.533742	1.04908	0.588957	0.723926	0.282941
		20	1.04908	0.644172	0.993865	0.895706	0.219577
		100	0.644172	0.662577	0.699387	0.668712	0.028114
		200	0.0368098	0.128834	0.460123	0.208589	0.222641
T2	avg (0)	0	0.925234	0.785047	1.28972	1	0.260511
	0.0356667	0.1	1.62617	0.813084	2.29907	1.57944	0.744092
		0.5	1.71028	1.09346	1.20561	1.33645	0.328568
		1	1.48598	1.34579	0.813084	1.21495	0.355017
		5	1.73832	0.869159	1.31776	1.30841	0.434655
		10	0.925234	1.1215	1.1215	1.05607	0.113312
		20	0.925234	0.728972	1.06542	0.906542	0.169001
		100	1.17757	0.448598	0.588785	0.738318	0.386808
		200	0.0280374	0.224299	1.14953	0.46729	0.598933

## Sheet: T2 SW480OXR
																Plate Layout (Concentration of Oxali in uM)
		1	2	3	4	5	6	7	8	9	10	11	12				1	2	3	4	5	6	7	8	9	10	11	12
	A	0.074	0.083	0.077	0.089	0.084	0.096	0.097	0.097	0.08	0.128	0.127	0.09	590		A	0	0	0	0.1	0.1	0.1	0.5	0.5	0.5	1	1	1
	B	0.092	0.082	0.083	0.094	0.126	0.075	0.072	0.081	0.089	0.08	0.083	0.071	590		B	5	5	5	10	10	10	20	20	20	100	100	100
	C	0.061	0.061	0.066	0.048	0.048	0.048	0.048	0.048	0.047	0.048	0.047	0.041	590		C	200	200	200
	D	0.094	0.059	0.066	0.093	0.069	0.077	0.079	0.114	0.092	0.091	0.066	0.074	590		D	0	0	0	0.1	0.1	0.1	0.5	0.5	0.5	1	1	1
	E	0.069	0.084	0.087	0.084	0.066	0.061	0.069	0.066	0.067	0.066	0.052	0.065	590		E	5	5	5	10	10	10	20	20	20	100	100	100
	F	0.07	0.058	0.077	0.048	0.049	0.046	0.049	0.052	0.052	0.048	0.046	0.049	590		F	200	200	200
	G	0.042	0.048	0.048	0.047	0.047	0.043	0.044	0.049	0.048	0.047	0.044	0.045	590		G
	H	0.042	0.043	0.043	0.041	0.042	0.043	0.042	0.049	0.047	0.048	0.044	0.047	590		H	Bkgrnd	Bkgrnd	Bkgrnd
avg (empty)		adjusted
0.0426667		0.0313333	0.0403333	0.0343333	0.0463333	0.0413333	0.0533333	0.0543333	0.0543333	0.0373333	0.0853333	0.0843333	0.0473333
		0.0493333	0.0393333	0.0403333	0.0513333	0.0833333	0.0323333	0.0293333	0.0383333	0.0463333	0.0373333	0.0403333	0.0283333
		0.0183333	0.0183333	0.0233333	0.00533333	0.00533333	0.00533333	0.00533333	0.00533333	0.00433333	0.00533333	0.00433333	-0.00166667
		0.0513333	0.0163333	0.0233333	0.0503333	0.0263333	0.0343333	0.0363333	0.0713333	0.0493333	0.0483333	0.0233333	0.0313333
		0.0263333	0.0413333	0.0443333	0.0413333	0.0233333	0.0183333	0.0263333	0.0233333	0.0243333	0.0233333	0.00933333	0.0223333
		0.0273333	0.0153333	0.0343333	0.00533333	0.00633333	0.00333333	0.00633333	0.00933333	0.00933333	0.00533333	0.00333333	0.00633333
		-0.000666667	0.00533333	0.00533333	0.00433333	0.00433333	0.000333333	0.00133333	0.00633333	0.00533333	0.00433333	0.00133333	0.00233333
		-0.000666667	0.000333333	0.000333333	-0.00166667	-0.000666667	0.000333333	-0.000666667	0.00633333	0.00433333	0.00533333	0.00133333	0.00433333
						mean	sd
T1	avg (0)	0	0.886792	1.14151	0.971698	1	0.129696
	0.0353333	0.1	1.31132	1.16981	1.50943	1.33019	0.170596
		0.5	1.53774	1.53774	1.0566	1.37736	0.277782
		1	2.41509	2.38679	1.33962	2.04717	0.612917
		5	1.39623	1.11321	1.14151	1.21698	0.155875
		10	1.45283	2.35849	0.915094	1.57547	0.729472
		20	0.830189	1.08491	1.31132	1.07547	0.240705
		100	1.0566	1.14151	0.801887	1	0.176745
		200	0.518868	0.518868	0.660377	0.566038	0.0817005
T2	avg (0)	0	1.69231	0.538462	0.769231	1	0.610558
	0.0303333	0.1	1.65934	0.868132	1.13187	1.21978	0.402864
		0.5	1.1978	2.35165	1.62637	1.72527	0.583246
		1	1.59341	0.769231	1.03297	1.13187	0.420895
		5	0.868132	1.36264	1.46154	1.23077	0.317923
		10	1.36264	0.769231	0.604396	0.912088	0.398797
		20	0.868132	0.769231	0.802198	0.813187	0.050358
		100	0.769231	0.307692	0.736264	0.604396	0.257481
		200	0.901099	0.505495	1.13187	0.846154	0.316781

## Sheet: T1 SW620P
																Plate Layout (Concentration of Oxali in uM)
		1	2	3	4	5	6	7	8	9	10	11	12				1	2	3	4	5	6	7	8	9	10	11	12
	A	0.102	0.098	0.115	0.116	0.124	0.118	0.116	0.099	0.098	0.091	0.08	0.091	590		A	0	0	0	0.1	0.1	0.1	0.5	0.5	0.5	1	1	1
	B	0.07	0.068	0.066	0.068	0.066	0.054	0.055	0.06	0.062	0.059	0.063	0.056	590		B	5	5	5	10	10	10	20	20	20	100	100	100
	C	0.058	0.055	0.058	0.048	0.049	0.047	0.046	0.047	0.047	0.048	0.047	0.041	590		C	200	200	200
	D	0.116	0.11	0.119	0.161	0.101	0.675	0.104	0.093	0.103	0.113	0.092	0.093	590		D	0	0	0	0.1	0.1	0.1	0.5	0.5	0.5	1	1	1
	E	0.1	0.085	0.1	0.096	0.094	0.067	0.065	0.068	0.063	0.071	0.06	0.066	590		E	5	5	5	10	10	10	20	20	20	100	100	100
	F	0.053	0.056	0.063	0.047	0.049	0.044	0.048	0.048	0.048	0.046	0.042	0.047	590		F	200	200	200
	G	0.05	0.055	0.055	0.051	0.046	0.043	0.044	0.049	0.049	0.047	0.044	0.046	590		G
	H	0.044	0.046	0.051	0.042	0.045	0.043	0.043	0.048	0.047	0.049	0.043	0.047	590		H	Bkgrnd	Bkgrnd	Bkgrnd
avg (empty)		adjusted
0.0533333		0.0486667	0.0446667	0.0616667	0.0626667	0.0706667	0.0646667	0.0626667	0.0456667	0.0446667	0.0376667	0.0266667	0.0376667
		0.0166667	0.0146667	0.0126667	0.0146667	0.0126667	0.000666667	0.00166667	0.00666667	0.00866667	0.00566667	0.00966667	0.00266667
		0.00466667	0.00166667	0.00466667	-0.00533333	-0.00433333	-0.00633333	-0.00733333	-0.00633333	-0.00633333	-0.00533333	-0.00633333	-0.0123333
		0.0626667	0.0566667	0.0656667	0.107667	0.0476667	0.621667	0.0506667	0.0396667	0.0496667	0.0596667	0.0386667	0.0396667
		0.0466667	0.0316667	0.0466667	0.0426667	0.0406667	0.0136667	0.0116667	0.0146667	0.00966667	0.0176667	0.00666667	0.0126667
		-0.000333333	0.00266667	0.00966667	-0.00633333	-0.00433333	-0.00933333	-0.00533333	-0.00533333	-0.00533333	-0.00733333	-0.0113333	-0.00633333
		-0.00333333	0.00166667	0.00166667	-0.00233333	-0.00733333	-0.0103333	-0.00933333	-0.00433333	-0.00433333	-0.00633333	-0.00933333	-0.00733333
		-0.00933333	-0.00733333	-0.00233333	-0.0113333	-0.00833333	-0.0103333	-0.0103333	-0.00533333	-0.00633333	-0.00433333	-0.0103333	-0.00633333
						mean	sd
T1	avg (0)	0	0.941935	0.864516	1.19355	1	0.17203
	0.0516667	0.1	1.2129	1.36774	1.25161	1.27742	0.0805806
		0.5	1.2129	0.883871	0.864516	0.987097	0.195793
		1	0.729032	0.516129	0.729032	0.658065	0.12292
		5	0.322581	0.283871	0.245161	0.283871	0.0387097
		10	0.283871	0.245161	0.0129032	0.180645	0.146552
		20	0.0322581	0.129032	0.167742	0.109677	0.0697849
		100	0.109677	0.187097	0.0516129	0.116129	0.067972
		200	0.0903226	0.0322581	0.0903226	0.0709677	0.0335236
T2	avg (0)	0	1.01622	0.918919	1.06486	1	0.074312
	0.0616667	0.1	1.74595	0.772973	10.0811	4.2	5.11635
		0.5	0.821622	0.643243	0.805405	0.756757	0.0986394
		1	0.967568	0.627027	0.643243	0.745946	0.192101
		5	0.756757	0.513514	0.756757	0.675676	0.140437
		10	0.691892	0.659459	0.221622	0.524324	0.262649
		20	0.189189	0.237838	0.156757	0.194595	0.0408099
		100	0.286486	0.108108	0.205405	0.2	0.089312
		200	-0.00540541	0.0432432	0.156757	0.0648649	0.0832152

## Sheet: T2 SW620P
																Plate Layout (Concentration of Oxali in uM)
		1	2	3	4	5	6	7	8	9	10	11	12				1	2	3	4	5	6	7	8	9	10	11	12
	A	0.123	0.12	0.122	0.107	0.114	0.122	0.09	0.081	0.091	0.085	0.081	0.08	590		A	0	0	0	0.1	0.1	0.1	0.5	0.5	0.5	1	1	1
	B	0.071	0.067	0.082	0.086	0.072	0.079	0.061	0.057	0.063	0.062	0.062	0.058	590		B	5	5	5	10	10	10	20	20	20	100	100	100
	C	0.066	0.059	0.065	0.048	0.049	0.048	0.046	0.048	0.048	0.048	0.048	0.042	590		C	200	200	200
	D	0.122	0.12	0.122	0.104	0.127	0.118	0.092	0.089	0.095	0.094	0.084	0.087	590		D	0	0	0	0.1	0.1	0.1	0.5	0.5	0.5	1	1	1
	E	0.097	0.075	0.082	0.071	0.077	0.079	0.064	0.061	0.061	0.064	0.057	0.064	590		E	5	5	5	10	10	10	20	20	20	100	100	100
	F	0.058	0.073	0.067	0.048	0.047	0.044	0.048	0.049	0.048	0.047	0.043	0.046	590		F	200	200	200
	G	0.052	0.061	0.058	0.047	0.047	0.043	0.044	0.049	0.048	0.048	0.044	0.045	590		G
	H	0.045	0.047	0.046	0.042	0.043	0.045	0.044	0.049	0.048	0.054	0.045	0.047	590		H	Bkgrnd	Bkgrnd	Bkgrnd
avg (empty)		adjusted
0.057		0.066	0.063	0.065	0.05	0.057	0.065	0.033	0.024	0.034	0.028	0.024	0.023
		0.014	0.01	0.025	0.029	0.015	0.022	0.004	0	0.006	0.005	0.005	0.001
		0.009	0.002	0.008	-0.009	-0.008	-0.009	-0.011	-0.009	-0.009	-0.009	-0.009	-0.015
		0.065	0.063	0.065	0.047	0.07	0.061	0.035	0.032	0.038	0.037	0.027	0.03
		0.04	0.018	0.025	0.014	0.02	0.022	0.007	0.004	0.004	0.007	0	0.007
		0.001	0.016	0.01	-0.009	-0.01	-0.013	-0.009	-0.008	-0.009	-0.01	-0.014	-0.011
		-0.005	0.004	0.001	-0.01	-0.01	-0.014	-0.013	-0.008	-0.009	-0.009	-0.013	-0.012
		-0.012	-0.01	-0.011	-0.015	-0.014	-0.012	-0.013	-0.008	-0.009	-0.003	-0.012	-0.01
						mean	sd
T1	avg (0)	0	1.02062	0.974227	1.00515	1	0.0236215
	0.0646667	0.1	0.773196	0.881443	1.00515	0.886598	0.116065
		0.5	0.510309	0.371134	0.525773	0.469072	0.0851686
		1	0.43299	0.371134	0.35567	0.386598	0.0409137
		5	0.216495	0.154639	0.386598	0.252577	0.120115
		10	0.448454	0.231959	0.340206	0.340206	0.108247
		20	0.0618557	0	0.0927835	0.0515464	0.047243
		100	0.0773196	0.0773196	0.0154639	0.056701	0.0357124
		200	0.139175	0.0309278	0.123711	0.0979381	0.0585454
T2	avg (0)	0	1.01036	0.979275	1.01036	1	0.0179487
	0.0643333	0.1	0.73057	1.08808	0.948187	0.92228	0.180159
		0.5	0.544041	0.497409	0.590674	0.544041	0.0466321
		1	0.57513	0.419689	0.466321	0.487047	0.0797658
		5	0.621762	0.279793	0.388601	0.430052	0.174712
		10	0.217617	0.310881	0.341969	0.290155	0.064715
		20	0.108808	0.0621762	0.0621762	0.0777202	0.0269231
		100	0.108808	0	0.108808	0.0725389	0.0628205
		200	0.015544	0.248705	0.15544	0.139896	0.117355

[truncated: 6 more sheets: T1 SW620OXR, T2 SW620OXR, T1 HCT116P, T2 HCT116P, T1 HCT116OXR, T2 HCT116OXR]
