# Supplementary material for: Oxaliplatin resistance in colorectal cancer enhances TRAIL sensitivity via death receptor 4 upregulation and lipid raft localization
Source: eLife. 2021 Aug 3;10:e67750. doi: 10.7554/eLife.67750 (PMC8331188; doi:10.7554/eLife.67750)
Supplement: Figure 1—figure supplement 1—source data 2. [file elife-67750-fig1-figsupp1-data2.xlsx]

## Sheet: HT29
	Raw Counts				Corrected Counts
T1	Sample	Total Cells	Live Cells	Dead Cells	Total Cells	Live Cells	Dead Cells	Percent Live	average live	sd live			Table Analyzed	HT29
	P1	311000	111000	199000	15550	5550	9950	0.356913	5761.67	735.939
	P2	188000	99700	88000	9400	4985	4400	0.530319					Column B	OxR
	P3	240000	135000	105000	12000	6750	5250	0.5625					vs.	vs.
	OXR1	346000	158000	188000	17300	7900	9400	0.456647	8983.33	1325.6			Column A	Parental
	OXR2	387000	164000	223000	19350	8200	11150	0.423773
	OXR3	405000	217000	188000	20250	10850	9400	0.535802					Unpaired t test
T2	Sample	Total Cells	Live Cells	Dead Cells	Total Cells	Live Cells	Dead Cells	Percent Live	average live				P value	0.0064
	P1	194000	93800	99700	9700	4690	4985	0.483505	3518.33	2147.22			P value summary	**
	P2	252000	76200	176000	12600	3810	8800	0.302381					Significantly different (P < 0.05)?	Yes
	P3	147000	41100	106000	7350	2055	5300	0.279592					One- or two-tailed P value?	Two-tailed
	OXR1	229000	111000	117000	11450	5550	5850	0.484716	7233.33	1608.48			t, df	t=3.438, df=10
	OXR2	323000	135000	188000	16150	6750	9400	0.417957
	OXR3	323000	188000	135000	16150	9400	6750	0.582043					How big is the difference?
													Mean of column A	4642
													Mean of column B	8117
													Difference between means (B - A) ± SEM	3475 ± 1011
													95% confidence interval	1223 to 5727
													R squared (eta squared)	0.5417
													F test to compare variances
													F, DFn, Dfd	1.404, 5, 5
													P value	0.7186
													P value summary	ns
													Significantly different (P < 0.05)?	No
													Data analyzed
													Sample size, column A	6
													Sample size, column B	6

## Sheet: SW480
	Raw Counts				Corrected Counts
T1	Sample	Total Cells	Live Cells	Dead Cells	Total Cells	Live Cells	Dead Cells	Percent Live	average live	sd live			Table Analyzed	SW480
	P1	152000	117000	35200	11400	8775	2640	0.769737	9375	561.249
	P2	158000	135000	23500	11850	10125	1762.5	0.85443					Column B	OxR
	P3	176000	123000	52800	13200	9225	3960	0.698864					vs.	vs.
	OXR1	282000	164000	117000	21150	12300	8775	0.58156	11150	813.173			Column A	Parental
	OXR2	147000	141000	5860	11025	10575	439.5	0.959184
	OXR3	158000	141000	17600	11850	10575	1320	0.892405					Unpaired t test
T2	Sample	Total Cells	Live Cells	Dead Cells	Total Cells	Live Cells	Dead Cells	Percent Live	average live				P value	0.3582
	P1	141000	106000	35200	7050	5300	1760	0.751773	5096.67	19148.8			P value summary	ns
	P2	938000	93800	0	46900	4690	0	0.1					Significantly different (P < 0.05)?	No
	P3	111000	106000	5860	5550	5300	293	0.954955					One- or two-tailed P value?	Two-tailed
	OXR1	287000	123000	164000	14350	6150	8200	0.428571	6245	1069.68			t, df	t=0.9632, df=10
	OXR2	217000	152000	645000	10850	7600	32250	0.700461
	OXR3	194000	99700	93800	9700	4985	4690	0.513918					How big is the difference?
													Mean of column A	7233
													Mean of column B	8707
													Difference between means (B - A) ± SEM	1473 ± 1530
													95% confidence interval	-1935 to 4882
													R squared (eta squared)	0.08489
													F test to compare variances
													F, DFn, Dfd	1.460, 5, 5
													P value	0.6883
													P value summary	ns
													Significantly different (P < 0.05)?	No
													Data analyzed
													Sample size, column A	6
													Sample size, column B	6

## Sheet: HCT116
	Raw Counts				Corrected Counts
T1	Sample	Total Cells	Live Cells	Dead Cells	Total Cells	Live Cells	Dead Cells	Percent Live	average live	sd live			Table Analyzed	HCT116
	P1	88000	76200	11700	44000	38100	5850	0.865909	79200	29438.9
	P2	211000	188000	23500	105500	94000	11750	0.890995					Column B	OxR
	P3	235000	211000	23500	117500	105500	11750	0.897872					vs.	vs.
	OXR1	270000	258000	11700	135000	129000	5850	0.955556	122167	7641.26			Column A	Parental
	OXR2	305000	252000	52800	152500	126000	26400	0.82623
	OXR3	235000	223000	11700	117500	111500	5850	0.948936					Unpaired t test
T2	Sample	Total Cells	Live Cells	Dead Cells	Total Cells	Live Cells	Dead Cells	Percent Live	average live				P value	0.0576
	P1	311000	293000	17600	155500	146500	8800	0.942122	104500	17976.8			P value summary	ns
	P2	264000	158000	106000	132000	79000	53000	0.598485					Significantly different (P < 0.05)?	No
	P3	223000	176000	46900	111500	88000	23450	0.789238					One- or two-tailed P value?	Two-tailed
	OXR1	235000	235000	0	117500	117500	0	1	132000	22660.5			t, df	t=2.144, df=10
	OXR2	258000	229000	29300	129000	114500	14650	0.887597
	OXR3	428000	328000	99700	214000	164000	49850	0.766355					How big is the difference?
													Mean of column A	92017
													Mean of column B	127333
													Difference between means (B - A) ± SEM	35317 ± 16471
													95% confidence interval	-1382 to 72016
													R squared (eta squared)	0.315
													F test to compare variances
													F, DFn, Dfd	3.464, 5, 5
													P value	0.199
													P value summary	ns
													Significantly different (P < 0.05)?	No
													Data analyzed
													Sample size, column A	6
													Sample size, column B	6

## Sheet: SW620
		Raw Counts			Corrected Counts
T1	Sample	Total Cells	Live Cells	Dead Cells	Total Cells	Live Cells	Dead Cells	Percent Live	average live	sd live			Table Analyzed	SW620
	P1	164000	129000	35200	4100	3225	880	0.786585	3125	254.951
	P2	352000	135000	217000	8800	3375	5425	0.383523					Column B	OxR
	P3	135000	111000	23500	3375	2775	587.5	0.822222					vs.	vs.
	OXR1	340000	287000	52800	8500	7175	1320	0.844118	6350	585.591			Column A	Parental
	OXR2	276000	240000	35200	6900	6000	880	0.869565
	OXR3	246000	235000	11700	6150	5875	292.5	0.955285					Unpaired t test
T2	Sample	Total Cells	Live Cells	Dead Cells	Total Cells	Live Cells	Dead Cells	Percent Live	average				P value	0.0002
	P1	217000	188000	29300	5425	4700	732.5	0.866359	4016.67	1215.41			P value summary	***
	P2	111000	106000	5860	2775	2650	146.5	0.954955					Significantly different (P < 0.05)?	Yes
	P3	211000	188000	23500	5275	4700	587.5	0.890995					One- or two-tailed P value?	Two-tailed
	OXR1	416000	369000	46900	10400	9225	1172.5	0.887019	8550	490.323			t, df	t=5.851, df=10
	OXR2	381000	334000	46900	9525	8350	1172.5	0.87664
	OXR3	364000	323000	41100	9100	8075	1027.5	0.887363					How big is the difference?
													Mean of column A	3573
													Mean of column B	7453
													Difference between means (B - A) ± SEM	3880 ± 663.1
													95% confidence interval	2402 to 5358
													R squared (eta squared)	0.7739
													F test to compare variances
													F, DFn, Dfd	2.159, 5, 5
													P value	0.4182
													P value summary	ns
													Significantly different (P < 0.05)?	No
													Data analyzed
													Sample size, column A	6
													Sample size, column B	6
