# Supplementary material for: Oxaliplatin resistance in colorectal cancer enhances TRAIL sensitivity via death receptor 4 upregulation and lipid raft localization
Source: eLife. 2021 Aug 3;10:e67750. doi: 10.7554/eLife.67750 (PMC8331188; doi:10.7554/eLife.67750)
Supplement: Figure 1—figure supplement 2—source data 1. [file elife-67750-fig1-figsupp2-data1.xlsx]

## Sheet: Sheet1
Figure 1-figure supplement 2
SW480										Avg	Std		SW480 OxR									Avg	Dev	% TRAIL Sensitization	SDNUm	TRAIL Sensitization SD
0	106	101	93	100	99	101	98	103	99	100	3.3665		102	100	98	103	99	99	100	100	100	100.111	1.44871	-0.111111	3.66498	3.66498
0.1	91	87	91	101	98	98	89	96	98	94.3333	4.6188		82	89	97	91	96	98	99	98	99	94.3	5.49747	0.0353357	7.18022	7.61154
1	99	98	98	96	98	96	92	91	92	95.5556	2.91018		95	97	97	95	93	94	93	97	96	95.2222	1.5476	0.348837	3.29609	3.44941
10	86	86	87	86	87	83	63	67	67	79.1111	9.63148		88	87	86	86	83	83	87	91	90	86.7778	2.57241	-9.69101	9.96909	12.6565
50	79	76	79	80	80	82	57	55	54	71.3333	11.431		76	76	77	74	75	74	82	83	85	78	3.94405	-9.34579	12.0922	17.0178
200	70	65	65	69	71	71	35	40	38	58.2222	14.733		67	67	73	63	64	64	77	73	74	69.1111	4.88636	-18.7023	15.5222	27.077
1000	63	62	63	66	68	67	27	31	29	52.8889	17.0192		65	66	64	56	58	58	57	63	59	60.6667	3.59011	-14.7059	17.3938	33.2261
HT29										Avg	Std		Ht29 OxR									Avg	Dev	% TRAIL Sensitization	SDNUm	TRAIL Sensitization SD
0	104	101	96	98	101	102	101	100	99	100.222	2.19989		102	102	96	103	98	99	99	99	102	100	2.21108	0.221729	3.11904	3.11213
0.1	79	72	84	102	102	106	91	90	90	90.6667	10.6562		77	96	101	95	96	96	97	99	95	94.6667	6.51494	-4.41176	12.49	13.7855
1	86	98	98	100	101	102	95	91	106	97.4444	5.69817		98	98	95	91	94	92	91	92	92	93.6667	2.62467	3.87685	6.2736	6.44212
10	84	84	82	94	99	94	92	91	88	89.7778	5.34951		93	90	87	85	86	87	70	68	67	81.4444	9.55814	9.28218	10.9533	12.213
50	82	79	82	80	83	81	78	77	79	80.1111	1.91163		76	77	77	75	80	77	57	49	53	69	11.5374	13.8696	11.6947	14.6018
200	71	71	67	62	65	70	70	57	70	67	4.57044		68	70	69	73	72	72	40	35	39	59.7778	15.519	10.7794	16.178	24.1575
1000	58	67	54	62	60	61	69	71	75	64.1111	6.40216		68	69	70	73	77	72	32	34	34	58.7778	18.1645	8.31889	19.2598	30.0527
HCT116										Avg	Std		HCT116 OXR									Avg	Dev	% TRAIL Sensitization	SDNUm	TRAIL Sensitization SD
0	98.25	102.78	98.98	100.66	99.17	100.17	102.04	99.34	98.62	100.001	1.47144		100.7	99.7	99.6	102	97.6	100.4	99.4	101	99.6	100	1.16333	0.0011111	1.87576	1.87574
0.1	91.08	95.76	97.51	94.32	94.57	99.42	89.8	90.51	90.37	93.7044	3.26528		95.6	99.3	81.7	85.5	86.2	82.7	98.2	99.2	100.8	92.1333	7.47053	1.67667	8.15297	8.70093
1	88.45	92.54	96.78	89.48	84.51	88.11	82.12	77.99	80.98	86.7733	5.60553		83.9	74.6	45.9	80.3	65.8	69	87	73.7	82	73.5778	11.7917	15.2069	13.0563	15.0784
10	53.51	52.49	51.61	44.37	43	45.98	29.74	25.47	17.08	40.3611	12.3725		23.5	27.7	28.8	23	42	33.2	33.8	38.2	31.4	31.2889	5.97131	22.4776	13.7381	34.7284
50	39.18	34.94	44.15	20.51	17.27	20.38	17.36	16.51	17.22	25.28	10.3179		12.8	11.7	10.7	24.6	15.1	18.7	11.3	10.3	11.2	14.0444	4.49793	44.4444	11.2557	48.0774
200	22.66	23.1	27.34	16.78	18.64	16.9	15.51	17.22	15.94	19.3433	3.84246		8.6	8	8.5	7.2	8.3	9.3	4.8	5.8	6.4	7.43333	1.40554	61.5716	4.09146	24.4334
1000	20.03	16.96	20.03	19.64	18.52	18.64	16.51	16.79	30.46	19.7311	4.00913		8.7	8.2	6.7	7.8	15	18.6	5.4	6	6.8	9.24444	4.2411	53.1479	5.8361	31.4879
SW620										Avg	Std		SW620 OxR									Avg	Dev	% TRAIL Sensitization	SDNUm	TRAIL Sensitization SD
0	99.9	102.2	97.9	100.6	98.7	100.7	99.2	102.3	98.5	100	1.48997		100.1	99	100.9	99.4695	100.947	99.5832	98.8432	98.8432	101.596	99.9202	0.962466	0.0797822	1.77379	1.77379
0.1	97.1	102.2	101.8	98	99.6	100.2	100.9	107.7	104.1	101.289	3.03038		101.1	102.7	103.1	95.036	95.036	93.4445	99.2022	99.2022	100.519	98.8155	3.32134	2.44192	4.49605	4.43944
1	99.9	101.1	99.4	95.8	95.4	97.7	103.6	102.8	99.3	99.4444	2.67046		96.9	92.7	94.2	79.9166	84.2365	82.3039	94.655	94.655	94.7746	90.4824	6.06175	9.01212	6.62391	6.66531
10	79.3	82.2	81.2	80.3	80	84	92	93	91.9	84.8778	5.40921		69.1	71	72.8	55.3619	56.4987	57.1808	56.2425	56.2425	56.4819	61.212	6.96629	27.8822	8.81979	10.542
50	72	73.3	72.1	74.1	77.2	78.8	86.3	84.5	84.8	78.1222	5.44299		64.6	61	59.3	49.6779	47.7454	46.6086	44.1564	44.1564	41.1647	50.9344	7.99889	34.8017	9.67514	12.6198
200	68	72.1	68.3	63.6	69.9	73.6	82.5	83.6	81.7	73.7	6.83228		56.3	54.1	54.4	37.5142	40.9246	42.1751	33.0275	33.0275	36.0192	43.0542	8.89912	41.5818	11.2194	15.7035
1000	66	67.3	69.9	73.3	71.2	74.6	80.3	81	79.9	73.7222	5.34577		49.2	49.6	47	39.5604	41.493	35.9227	34.5832	34.5832	33.9848	40.6586	6.10837	44.8489	8.11723	11.4808
