# Supplementary material for: Oxaliplatin resistance in colorectal cancer enhances TRAIL sensitivity via death receptor 4 upregulation and lipid raft localization
Source: eLife. 2021 Aug 3;10:e67750. doi: 10.7554/eLife.67750 (PMC8331188; doi:10.7554/eLife.67750)
Supplement: Figure 1—figure supplement 3—source data 1. [file elife-67750-fig1-figsupp3-data1.xlsx]

## Sheet: Sheet1
Figure 1-figure supplement 3
JC-1 red (-) cell populations (SW620 cell lines)																						Number of comparisons per family	4
TRAIL Concentration (ng/mL)	Parental									OXR												Alpha	0.05
	t1			t2			t3			t1			t2			t3
0	13	16.2	16.9	22.7	24.6	24.1	26.2	27	30	15.6	10.1	17.8	21.4	18	25	29.1	35.1	33.9				Šídák's multiple comparisons test	Mean Diff.	95.00% CI of diff.	Below threshold?	Summary	Adjusted P Value
1	16.8	17.9	15.9	29.3	21.2	20.2	29.8	30.5	33.1	18.9	14.4	21	24.6	27.6	27.2	31.5	40.3	39.3
10	31.4	26.9	33.2	27.8	29.8	32.2	40.7	39	41.3	37.6	37.7	35.6	41.2	38.7	40.7	44.3	41.8	46.3				Parental - OXR
200	45.1	45.4	47.2	40	43.5	37.6	42.8	44.8	45.1	72.2	73.6	77	61.8	62.5	59.2	65.1	65.7	66.8				0	-0.5889	-8.150 to 6.972	No	ns	0.9994
																						1	-3.344	-10.91 to 4.217	No	ns	0.702
																						10	-6.844	-14.41 to 0.7165	No	ns	0.0909
																						200	-23.6	-31.16 to -16.04	Yes	****	<0.0001
