# Supplementary material for: Oxaliplatin resistance in colorectal cancer enhances TRAIL sensitivity via death receptor 4 upregulation and lipid raft localization
Source: eLife. 2021 Aug 3;10:e67750. doi: 10.7554/eLife.67750 (PMC8331188; doi:10.7554/eLife.67750)
Supplement: Figure 1—source data 1. [file elife-67750-fig1-data1.xlsx]

## Sheet: SW620 OXR t1
Dose (ng/ml)				Avg
0	89.3	88.3	90	89.2
0.1	90.2	91.6	92	91.2667
1	86.4	82.7	84	84.3667
10	61.6	63.3	64.9	63.2667
50	57.6	54.4	52.9	54.9667
200	50.2	48.3	48.5	49
1000	43.9	44.2	41.9	43.3333
Normalized
Dose (ng/ml)
0	1.00112	0.98991	1.00897
0.1	1.01121	1.02691	1.03139
1	0.96861	0.92713	0.941704
10	0.690583	0.709641	0.727578
50	0.64574	0.609865	0.593049
200	0.56278	0.54148	0.543722
1000	0.492152	0.495516	0.469731

## Sheet: SW620 OXR t2
Dose (ng/ml)
0	87.5	88.8	87.6	87.9667
0.1	83.6	83.6	82.2	83.1333
1	70.3	74.1	72.4	72.2667
10	48.7	49.7	50.3	49.5667
50	43.7	42	41	42.2333
200	33	36	37.1	35.3667
1000	34.8	36.5	31.6	34.3
Normalized
Dose (ng/ml)
0	0.994695	1.00947	0.995832
0.1	0.95036	0.95036	0.934445
1	0.799166	0.842365	0.823039
10	0.553619	0.564987	0.571808
50	0.496779	0.477454	0.466086
200	0.375142	0.409246	0.421751
1000	0.395604	0.41493	0.359227

## Sheet: SW620 OXR t3
Dose (ng/ml)
0	82.6	84.9	83.2	83.5667
0.1	82.9	84	83.6	83.5
1	79.1	79.2	76.1	78.1333
10	47	47.2	49.6	47.9333
50	36.9	34.4	33.3	34.8667
200	27.6	30.1	31.3	29.6667
1000	28.9	28.4	27.7	28.3333
Normalized
Dose (ng/ml)
0	0.988432	1.01596	0.995612
0.1	0.992022	1.00519	1.0004
1	0.94655	0.947746	0.91065
10	0.562425	0.564819	0.593538
50	0.441564	0.411647	0.398484
200	0.330275	0.360191	0.374551
1000	0.345832	0.339848	0.331472

## Sheet: SW620 t1
Dose (ng/ml)
0	89.8	91.8	88	89.8667
0.1	87.3	91.8	91.5	90.2
1	89.8	90.9	89.3	90
10	71.3	73.9	73	72.7333
50	64.7	65.9	64.8	65.1333
200	61.1	64.8	61.4	62.4333
1000	59.3	60.5	62.8	60.8667
Normalized
Dose (ng/ml)
0	0.999258	1.02151	0.979228
0.1	0.971439	1.02151	1.01818
1	0.999258	1.0115	0.993694
10	0.793398	0.822329	0.812315
50	0.719955	0.733309	0.721068
200	0.679896	0.721068	0.683234
1000	0.659866	0.67322	0.698813

## Sheet: SW620 t2
	T1	T2	T3
Dose (ng/ml)
0	88.7	87	88.8	88.1667
0.1	86.4	87.8	88.3	87.5
1	84.5	84.1	86.1	84.9
10	70.8	70.5	74.1	71.8
50	65.3	68.1	69.5	67.6333
200	56.1	61.6	64.9	60.8667
1000	64.6	62.8	65.8	64.4
Normalized
Dose (ng/ml)
0	1.00605	0.986767	1.00718
0.1	0.979962	0.995841	1.00151
1	0.958412	0.953875	0.97656
10	0.803025	0.799622	0.840454
50	0.740643	0.772401	0.78828
200	0.636295	0.698677	0.736106
1000	0.732703	0.712287	0.746314

## Sheet: SW620 t3
	T1	T2	T3
Dose (ng/ml)
0	81.1	83.6	80.5	81.7333
0.1	82.5	88	85.1	85.2
1	84.7	84	81.2	83.3
10	75.2	76	75.1	75.4333
50	70.5	69.1	69.3	69.6333
200	67.4	68.3	66.8	67.5
1000	65.6	66.2	65.3	65.7
Normalized
Dose (ng/ml)
0	0.992251	1.02284	0.98491
0.1	1.00938	1.07667	1.04119
1	1.0363	1.02773	0.993475
10	0.920065	0.929853	0.918842
50	0.862561	0.845432	0.847879
200	0.824633	0.835644	0.817292
1000	0.80261	0.809951	0.79894

## Sheet: SW480 t1
	T1	T2	T3
Dose (ng/ml)
0	80.7	77.2	70.7	76.2
0.1	69	66.3	69	68.1
1	75.3	75	74.3	74.8667
10	65.7	65.8	66.5	66
50	60.3	57.8	60.3	59.4667
200	53.5	49.4	49.4	50.7667
1000	47.8	47.4	48	47.7333
Normalized
Dose (ng/ml)
0	1.05906	1.01312	0.927822
0.1	0.905512	0.870079	0.905512
1	0.988189	0.984252	0.975066
10	0.862205	0.863517	0.872703
50	0.791339	0.75853	0.791339
200	0.7021	0.648294	0.648294
1000	0.627297	0.622047	0.629921

## Sheet: SW480 t2
	T1	T2	T3
Dose (ng/ml)
0	84.4	83.4	85.6	84.4667
0.1	85.1	83.1	83	83.7333
1	80.9	82.6	80.9	81.4667
10	72.7	73.1	70.5	72.1
50	67.2	67.2	69.3	67.9
200	58.3	59.8	60.1	59.4
1000	55.5	57.2	56.6	56.4333
Normalized
Dose (ng/ml)
0	0.999211	0.987372	1.01342
0.1	1.0075	0.98382	0.982636
1	0.957774	0.977901	0.957774
10	0.860695	0.86543	0.834649
50	0.79558	0.79558	0.820442
200	0.690213	0.707972	0.711523
1000	0.657064	0.67719	0.670087

## Sheet: SW480 t3
	T1	T2	T3
Dose (ng/ml)
0	78.9	83.4	79.7	80.6667
0.1	71.6	77.5	78.9	76
1	74.2	73.4	74.3	73.9667
10	51.1	53.9	53.8	52.9333
50	45.7	44.7	43.2	44.5333
200	28.3	32	30.4	30.2333
1000	22.1	25.4	23.3	23.6
Normalized
Dose (ng/ml)
0	0.978099	1.03388	0.988017
0.1	0.887603	0.960744	0.978099
1	0.919835	0.909917	0.921074
10	0.633471	0.668182	0.666942
50	0.566529	0.554132	0.535537
200	0.350826	0.396694	0.37686
1000	0.273967	0.314876	0.288843

## Sheet: SW480 OXR t1
	T1	T2	T3
Dose (ng/ml)
0	85.1	83.9	82.4	83.8
0.1	68.5	75	81.3	74.9333
1	79.7	81.3	81.7	80.9
10	73.7	73.2	71.8	72.9
50	63.6	63.9	64.4	63.9667
200	56.2	56	61.2	57.8
1000	54.1	55.4	53.3	54.2667
Normalized
Dose (ng/ml)
0	1.01551	1.00119	0.983294
0.1	0.817422	0.894988	0.970167
1	0.951074	0.970167	0.97494
10	0.879475	0.873508	0.856802
50	0.75895	0.76253	0.768496
200	0.670644	0.668258	0.73031
1000	0.645585	0.661098	0.636038

[truncated: 15 more sheets: SW480 OXR t2, SW480 OXR t3, HT29 t1, HT29 t2, HT29 t3, HT29 oxr t1, HT29 oxr t2, HT29 oxr t3, HCT116 t1, HCT116 t2, HCT116 t3, HCT116 OXR t1, HCT116 OXR t2, HCT116 OXR t3, JC-1 Assay (SW620)]
