# Supplementary material for: Oxaliplatin resistance in colorectal cancer enhances TRAIL sensitivity via death receptor 4 upregulation and lipid raft localization
Source: eLife. 2021 Aug 3;10:e67750. doi: 10.7554/eLife.67750 (PMC8331188; doi:10.7554/eLife.67750)
Supplement: Figure 2—figure supplement 1—source data 1. [file elife-67750-fig2-figsupp1-data1.xlsx]

## Sheet: TRAIL Sensitization
Figure 2-figure supplement 1 (related to panel C)
SW620 Par
[TRAIL]										Avg	Std			SW620 OxR									Avg	Dev	% TRAIL Sensitization	SDNUm	TRAIL Sensitization SD			Table Analyzed
0	99.9	102.2	97.9	100.6	98.7	100.7	99.2	102.3	98.6	100.011	1.47907		w/o zb4	97.2243	100.375	102.401	101.202	97.596	101.202	99.1356	99.2534	101.611	100	1.70545	0.0111099	2.25748	2.25723
1000	66	67.3	69.9	73.3	71.2	74.6	80.3	81	79.9	73.7222	5.34577		w/o zb4	49.7374	49.6249	54.4636	44.9011	44.9011	50.8337	40.9037	42.6719	42.554	46.7324	4.3284	36.6102	6.8784	9.70047			Column B	SW620 OxR + ZB4
1000	66	67.3	69.9	73.3	71.2	74.6	80.3	81	79.9	73.7222	5.34577		w/ zb4	48.4996	46.4741	50.7502	48.8561	42.691	48.1582	40.668	43.8507	40.668	45.624	3.54354	38.1137	6.41358	9.12809			vs.	vs.
																														Column A	SW620 OxR
																														Unpaired t test
																														P value	0.7399
																														P value summary	ns
																														Significantly different (P < 0.05)?	No
																														One- or two-tailed P value?	Two-tailed
																														t, df	t=0.3378, df=16
																														How big is the difference?
																														Mean of column A	36.61
																														Mean of column B	38.11
																														Difference between means (B - A) ± SEM	1.500 ± 4.440
																														95% confidence interval	-7.912 to 10.91
																														R squared (eta squared)	0.007083
																														F test to compare variances
																														F, DFn, Dfd	1.129, 8, 8
																														P value	0.8676
																														P value summary	ns
																														Significantly different (P < 0.05)?	No
																														Data analyzed
																														Sample size, column A	9
																														Sample size, column B	9

## Sheet: %Apoptosis
Figure 2-figure supplement 1 (related to panel B)
Apoptosis
OxR	t1			t2			t3				Number of families	1
Untreated	11.59	9.31	7.84	9.07	12.54	9.38	11.15	11.15	10.88		Number of comparisons per family	6
500 ng/ml ZB4 only	9.82	8.95	12.84	7.87	9.1	10.37	11.02	11.2	14.82		Alpha	0.05
1000ng/ml Trail only	53.55	53.22	49.67	54.87	55.3	52.16	58.27	58.02	57.83
ZB4+Trail	54.7	55.96	52.75	52.62	56.91	54	57.58	56.92	58.33		Tukey's multiple comparisons test	Mean Diff.	95.00% CI of diff.	Below threshold?	Summary	Adjusted P Value
											Untreated vs. ZB4	-0.3422	-3.187 to 2.502	No	ns	0.9878	A-B
											Untreated vs. TRAIL	-44.44	-47.29 to -41.60	Yes	****	<0.0001	A-C
											Untreated vs. TRAIL+ZB4	-45.21	-48.05 to -42.36	Yes	****	<0.0001	A-D
											ZB4 vs. TRAIL	-44.1	-46.94 to -41.26	Yes	****	<0.0001	B-C
											ZB4 vs. TRAIL+ZB4	-44.86	-47.71 to -42.02	Yes	****	<0.0001	B-D
											TRAIL vs. TRAIL+ZB4	-0.7644	-3.609 to 2.080	No	ns	0.8851	C-D
											Test details	Mean 1	Mean 2	Mean Diff.	SE of diff.	n1	n2
											Untreated vs. ZB4	10.32	10.67	-0.3422	1.05	9	9
											Untreated vs. TRAIL	10.32	54.77	-44.44	1.05	9	9
											Untreated vs. TRAIL+ZB4	10.32	55.53	-45.21	1.05	9	9
											ZB4 vs. TRAIL	10.67	54.77	-44.1	1.05	9	9
											ZB4 vs. TRAIL+ZB4	10.67	55.53	-44.86	1.05	9	9
											TRAIL vs. TRAIL+ZB4	54.77	55.53	-0.7644	1.05	9	9
