# Supplementary material for: Oxaliplatin resistance in colorectal cancer enhances TRAIL sensitivity via death receptor 4 upregulation and lipid raft localization
Source: eLife. 2021 Aug 3;10:e67750. doi: 10.7554/eLife.67750 (PMC8331188; doi:10.7554/eLife.67750)
Supplement: Figure 2—source data 1. [file elife-67750-fig2-data1.xlsx]

## Sheet: Definitions
Comments:
A: This gene's average threshold cycle is relatively high (> 30) in either the control or the test sample, and is reasonably low in the other sample (< 30).
These data mean that the gene's expression is relatively low in one sample and reasonably detected in the other sample suggesting that the actual fold-change value is at least as large as the calculated and reported fold-change result.
This fold-change result may also have greater variations if p value > 0.05; therefore, it is important to have a sufficient number of biological replicates to validate the result for this gene.
B: This gene's average threshold cycle is relatively high (> 30), meaning that its relative expression level is low, in both control and test samples, and the p-value for the fold-change is either unavailable or relatively high (p > 0.05).
This fold-change result may also have greater variations; therefore, it is important to have a sufficient number of biological replicates to validate the result for this gene.
C: This gene's average threshold cycle is either not determined or greater than the defined cut-off (deault 35), in both samples meaning that its expression was undetected, making this fold-change result erroneous and un-interpretable.
Fold Change & Fold Regulation:
Fold-Change (2^(- Delta Delta CT)) is the normalized gene expression (2^(- Delta CT)) in the Test Sample divided the normalized gene expression (2^(- Delta CT)) in the Control Sample.
Fold-Regulation represents fold-change results in a biologically meaningful way. Fold-change values greater than one indicate a positive- or an up-regulation, and the fold-regulation is equal to the fold-change.
Fold-change values less than one indicate a negative or down-regulation, and the fold-regulation is the negative inverse of the fold-change.
Fold-change and fold-regulation values greater than 2 are indicated in red; fold-change values less than 0.5 and fold-regulation values less than -2 are indicated in blue.
p-value:
The p values are calculated based on a Student's t-test of the replicate 2^(- Delta CT) values for each gene in the control group and treatment groups, and p values less than 0.05 are indicated in red.

## Sheet: Gene Table
PCR Array Catalog #:	PAHS-012Z
Position	Unigene	Refseq	Symbol	Description	Gname	RT2 Catalog
A01	Hs.431048	NM_005157	ABL1	C-abl oncogene 1, non-receptor tyrosine kinase	ABL/JTK7/bcr/abl/c-ABL/c-ABL1/p150/v-abl	PPH00087E
A02	Hs.424932	NM_004208	AIFM1	Apoptosis-inducing factor, mitochondrion-associated, 1	AIF/CMT2D/CMTX4/COWCK/COXPD6/NADMR/NAMSD/PDCD8	PPH01037A
A03	Hs.525622	NM_005163	AKT1	V-akt murine thymoma viral oncogene homolog 1	AKT/CWS6/PKB/PKB-ALPHA/PRKBA/RAC/RAC-ALPHA	PPH00088B
A04	Hs.552567	NM_001160	APAF1	Apoptotic peptidase activating factor 1	APAF-1/CED4	PPH00752A
A05	Hs.370254	NM_004322	BAD	BCL2-associated agonist of cell death	BBC2/BCL2L8	PPH00075C
A06	Hs.377484	NM_004323	BAG1	BCL2-associated athanogene	BAG-1/HAP/RAP46	PPH00076F
A07	Hs.523309	NM_004281	BAG3	BCL2-associated athanogene 3	BAG-3/BIS/CAIR-1/MFM6	PPH01036C
A08	Hs.485139	NM_001188	BAK1	BCL2-antagonist/killer 1	BAK/BAK-LIKE/BCL2L7/CDN1	PPH00077F
A09	Hs.624291	NM_004324	BAX	BCL2-associated X protein	BCL2L4	PPH00078B
A10	Hs.193516	NM_003921	BCL10	B-cell CLL/lymphoma 10	CARMEN/CIPER/CLAP/IMD37/c-E10/mE10	PPH00890F
A11	Hs.150749	NM_000633	BCL2	B-cell CLL/lymphoma 2	Bcl-2/PPP1R50	PPH00079B
A12	Hs.227817	NM_004049	BCL2A1	BCL2-related protein A1	ACC-1/ACC-2/ACC1/ACC2/BCL2L5/BFL1/GRS/HBPA1	PPH00365F
B01	Hs.516966	NM_138578	BCL2L1	BCL2-like 1	BCL-XL/S/BCL2L/BCLX/BCLXL/BCLXS/Bcl-X/PPP1R52/bcl-xL/bcl-xS	PPH00082C
B02	Hs.283672	NM_020396	BCL2L10	BCL2-like 10 (apoptosis facilitator)	BCL-B/Boo/Diva/bcl2-L-10	PPH15924B
B03	Hs.469658	NM_006538	BCL2L11	BCL2-like 11 (apoptosis facilitator)	BAM/BIM/BOD	PPH00893F
B04	Hs.410026	NM_004050	BCL2L2	BCL2-like 2	BCL-W/BCL2-L-2/BCLW/PPP1R51	PPH00081E
B05	Hs.435556	NM_016561	BFAR	Bifunctional apoptosis regulator	BAR/RNF47	PPH00887C
B06	Hs.517145	NM_001196	BID	BH3 interacting domain death agonist	FP497	PPH00084C
B07	Hs.475055	NM_001197	BIK	BCL2-interacting killer (apoptosis-inducing)	BIP1/BP4/NBK	PPH00363C
B08	Hs.696238	NM_001166	BIRC2	Baculoviral IAP repeat containing 2	API1/HIAP2/Hiap-2/MIHB/RNF48/c-IAP1/cIAP1	PPH00340B
B09	Hs.127799	NM_001165	BIRC3	Baculoviral IAP repeat containing 3	AIP1/API2/CIAP2/HAIP1/HIAP1/MALT2/MIHC/RNF49/c-IAP2	PPH00326B
B10	Hs.744872	NM_001168	BIRC5	Baculoviral IAP repeat containing 5	API4/EPR-1	PPH00271E
B11	Hs.150107	NM_016252	BIRC6	Baculoviral IAP repeat containing 6	APOLLON/BRUCE	PPH00900F
B12	Hs.646490	NM_004330	BNIP2	BCL2/adenovirus E1B 19kDa interacting protein 2	BNIP-2/NIP2	PPH14371F
C01	Hs.144873	NM_004052	BNIP3	BCL2/adenovirus E1B 19kDa interacting protein 3	NIP3	PPH00301C
C02	Hs.131226	NM_004331	BNIP3L	BCL2/adenovirus E1B 19kDa interacting protein 3-like	BNIP3a/NIX	PPH12205C
C03	Hs.550061	NM_004333	BRAF	V-raf murine sarcoma viral oncogene homolog B1	B-RAF1/BRAF1/NS7/RAFB1	PPH00712A
C04	Hs.2490	NM_033292	CASP1	Caspase 1, apoptosis-related cysteine peptidase (interleukin 1, beta, convertase)	ICE/IL1BC/P45	PPH00105C
C05	Hs.5353	NM_001230	CASP10	Caspase 10, apoptosis-related cysteine peptidase	ALPS2/FLICE2/MCH4	PPH00106F
C06	Hs.466057	NM_012114	CASP14	Caspase 14, apoptosis-related cysteine peptidase	-	PPH00898B
C07	Hs.368982	NM_032982	CASP2	Caspase 2, apoptosis-related cysteine peptidase	CASP-2/ICH1/NEDD-2/NEDD2/PPP1R57	PPH00111A
C08	Hs.141125	NM_004346	CASP3	Caspase 3, apoptosis-related cysteine peptidase	CPP32/CPP32B/SCA-1	PPH00107C
C09	Hs.138378	NM_001225	CASP4	Caspase 4, apoptosis-related cysteine peptidase	ICE(rel)II/ICEREL-II/ICH-2/Mih1/TX/TX	PPH00366F
C10	Hs.213327	NM_004347	CASP5	Caspase 5, apoptosis-related cysteine peptidase	ICE(rel)III/ICEREL-III/ICH-3	PPH00108G
C11	Hs.654616	NM_032992	CASP6	Caspase 6, apoptosis-related cysteine peptidase	MCH2	PPH00109B
C12	Hs.9216	NM_001227	CASP7	Caspase 7, apoptosis-related cysteine peptidase	CASP-7/CMH-1/ICE-LAP3/LICE2/MCH3	PPH00110C
D01	Hs.599762	NM_001228	CASP8	Caspase 8, apoptosis-related cysteine peptidase	ALPS2B/CAP4/Casp-8/FLICE/MACH/MCH5	PPH00359F
D02	Hs.329502	NM_001229	CASP9	Caspase 9, apoptosis-related cysteine peptidase	APAF-3/APAF3/ICE-LAP6/MCH6/PPP1R56	PPH00353B
D03	Hs.355307	NM_001242	CD27	CD27 molecule	S152/S152. LPFS2/T14/TNFRSF7/Tp55	PPH00269F
D04	Hs.472860	NM_001250	CD40	CD40 molecule, TNF receptor superfamily member 5	Bp50/CDW40/TNFRSF5/p50	PPH00296D
D05	Hs.592244	NM_000074	CD40LG	CD40 ligand	CD154/CD40L/HIGM1/IGM/IMD3/T-BAM/TNFSF5/TRAP/gp39/hCD40L	PPH00259C
D06	Hs.501497	NM_001252	CD70	CD70 molecule	CD27L/CD27LG/TNFSF7	PPH00258F
D07	Hs.390736	NM_003879	CFLAR	CASP8 and FADD-like apoptosis regulator	CASH/CASP8AP1/CLARP/Casper/FLAME/FLAME-1/FLAME1/FLIP/I-FLICE/MRIT/c-FLIP/c-FLIPL/c-FLIPR/c-FLIPS	PPH00333B
D08	Hs.249129	NM_001279	CIDEA	Cell death-inducing DFFA-like effector a	CIDE-A	PPH00899C
D09	Hs.642693	NM_014430	CIDEB	Cell death-inducing DFFA-like effector b	-	PPH00913C
D10	Hs.38533	NM_003805	CRADD	CASP2 and RIPK1 domain containing adaptor with death domain	MRT34/RAIDD	PPH00334C
D11	Hs.437060	NM_018947	CYCS	Cytochrome c, somatic	CYC/HCS/THC4	PPH20675F
D12	Hs.380277	NM_004938	DAPK1	Death-associated protein kinase 1	DAPK	PPH00273F
E01	Hs.484782	NM_004401	DFFA	DNA fragmentation factor, 45kDa, alpha polypeptide	DFF-45/DFF1/ICAD	PPH00285C
E02	Hs.169611	NM_019887	DIABLO	Diablo, IAP-binding mitochondrial protein	DFNA64/SMAC	PPH05797A
E03	Hs.86131	NM_003824	FADD	Fas (TNFRSF6)-associated via death domain	GIG3/MORT1	PPH00367A
E04	Hs.667309	NM_000043	FAS	Fas (TNF receptor superfamily, member 6)	ALPS1A/APO-1/APT1/CD95/FAS1/FASTM/TNFRSF6	PPH00141B
E05	Hs.2007	NM_000639	FASLG	Fas ligand (TNF superfamily, member 6)	ALPS1B/APT1LG1/APTL/CD178/CD95-L/CD95L/FASL/TNFSF6	PPH00142C
E06	Hs.80409	NM_001924	GADD45A	Growth arrest and DNA-damage-inducible, alpha	DDIT1/GADD45	PPH00148B
E07	Hs.87247	NM_003806	HRK	Harakiri, BCL2 interacting protein (contains only BH3 domain)	DP5/HARAKIRI	PPH00369B
E08	Hs.643120	NM_000875	IGF1R	Insulin-like growth factor 1 receptor	CD221/IGFIR/IGFR/JTK13	PPH00350F
E09	Hs.193717	NM_000572	IL10	Interleukin 10	CSIF/GVHDS/IL-10/IL10A/TGIF	PPH00572C
E10	Hs.36	NM_000595	LTA	Lymphotoxin alpha (TNF superfamily, member 1)	LT/TNFB/TNFSF1	PPH00337F
E11	Hs.1116	NM_002342	LTBR	Lymphotoxin beta receptor (TNFR superfamily, member 3)	CD18/D12S370/LT-BETA-R/TNF-R-III/TNFCR/TNFR-RP/TNFR2-RP/TNFR3/TNFRSF3	PPH00816C
E12	Hs.632486	NM_021960	MCL1	Myeloid cell leukemia sequence 1 (BCL2-related)	BCL2L3/EAT/MCL1-ES/MCL1L/MCL1S/Mcl-1/TM/bcl2-L-3/mcl1/EAT	PPH00397E
F01	Hs.646951	NM_004536	NAIP	NLR family, apoptosis inhibitory protein	BIRC1/NLRB1/psiNAIP	PPH00909E
F02	Hs.618430	NM_003998	NFKB1	Nuclear factor of kappa light polypeptide gene enhancer in B-cells 1	EBP-1/KBF1/NF-kB1/NF-kappa-B/NF-kappaB/NFKB-p105/NFKB-p50/NFkappaB/p105/p50	PPH00204F
F03	Hs.738731	NM_006092	NOD1	Nucleotide-binding oligomerization domain containing 1	CARD4/CLR7.1/NLRC1	PPH00891C
F04	Hs.513667	NM_003946	NOL3	Nucleolar protein 3 (apoptosis repressor with CARD domain)	ARC/FCM/MYP/NOP/NOP30	PPH00902F
F05	Hs.499094	NM_013258	PYCARD	PYD and CARD domain containing	ASC/CARD5/TMS/TMS-1/TMS1	PPH00907A
F06	Hs.103755	NM_003821	RIPK2	Receptor-interacting serine-threonine kinase 2	CARD3/CARDIAK/CCK/GIG30/RICK/RIP2	PPH00881C
F07	Hs.241570	NM_000594	TNF	Tumor necrosis factor	DIF/TNF-alpha/TNFA/TNFSF2	PPH00341F
F08	Hs.591834	NM_003844	TNFRSF10A	Tumor necrosis factor receptor superfamily, member 10a	APO2/CD261/DR4/TRAILR-1/TRAILR1	PPH00842A
F09	Hs.661668	NM_003842	TNFRSF10B	Tumor necrosis factor receptor superfamily, member 10b	CD262/DR5/KILLER/KILLER/DR5/TRAIL-R2/TRAILR2/TRICK2/TRICK2A/TRICK2B/TRICKB/ZTNFR9	PPH00241C
F10	Hs.81791	NM_002546	TNFRSF11B	Tumor necrosis factor receptor superfamily, member 11b	OCIF/OPG/PDB5/TR1	PPH01049B
F11	Hs.713833	NM_001065	TNFRSF1A	Tumor necrosis factor receptor superfamily, member 1A	CD120a/FPF/MS5/TBP1/TNF-R/TNF-R-I/TNF-R55/TNFAR/TNFR1/TNFR1-d2/TNFR55/TNFR60/p55/p55-R/p60	PPH00346C
F12	Hs.256278	NM_001066	TNFRSF1B	Tumor necrosis factor receptor superfamily, member 1B	CD120b/TBPII/TNF-R-II/TNF-R75/TNFBR/TNFR1B/TNFR2/TNFR80/p75/p75TNFR	PPH00348A
G01	Hs.443577	NM_014452	TNFRSF21	Tumor necrosis factor receptor superfamily, member 21	BM-018/CD358/DR6	PPH00262A
G02	Hs.462529	NM_003790	TNFRSF25	Tumor necrosis factor receptor superfamily, member 25	APO-3/DDR3/DR3/LARD/TNFRSF12/TR3/TRAMP/WSL-1/WSL-LR	PPH00349B
G03	Hs.738942	NM_001561	TNFRSF9	Tumor necrosis factor receptor superfamily, member 9	4-1BB/CD137/CDw137/ILA	PPH00827E
G04	Hs.478275	NM_003810	TNFSF10	Tumor necrosis factor (ligand) superfamily, member 10	APO2L/Apo-2L/CD253/TL2/TRAIL	PPH00242F
G05	Hs.654445	NM_001244	TNFSF8	Tumor necrosis factor (ligand) superfamily, member 8	CD153/CD30L/CD30LG	PPH00268A
G06	Hs.437460	NM_000546	TP53	Tumor protein p53	BCC7/LFS1/P53/TRP53	PPH00213F
G07	Hs.523968	NM_005426	TP53BP2	Tumor protein p53 binding protein, 2	53BP2/ASPP2/BBP/P53BP2/PPP1R13A	PPH00394F
G08	Hs.192132	NM_005427	TP73	Tumor protein p73	P73	PPH00725A
G09	Hs.460996	NM_003789	TRADD	TNFRSF1A-associated via death domain	Hs.89862	PPH00392F
G10	Hs.522506	NM_021138	TRAF2	TNF receptor-associated factor 2	MGC:45012/TRAP/TRAP3	PPH00352B
G11	Hs.510528	NM_003300	TRAF3	TNF receptor-associated factor 3	CAP-1/CAP1/CD40bp/CRAF1/IIAE5/LAP1	PPH00338A
G12	Hs.356076	NM_001167	XIAP	X-linked inhibitor of apoptosis	API3/BIRC4/IAP-3/ILP1/MIHA/XLP2/hIAP-3/hIAP3	PPH00323A
H01	Hs.520640	NM_001101	ACTB	Actin, beta	BRWS1/PS1TP5BP1	PPH00073G
H02	Hs.534255	NM_004048	B2M	Beta-2-microglobulin	-	PPH01094E
H03	Hs.592355	NM_002046	GAPDH	Glyceraldehyde-3-phosphate dehydrogenase	G3PD/GAPD/HEL-S-162eP	PPH00150F
H04	Hs.412707	NM_000194	HPRT1	Hypoxanthine phosphoribosyltransferase 1	HGPRT/HPRT	PPH01018C
H05	Hs.546285	NM_001002	RPLP0	Ribosomal protein, large, P0	L10E/LP0/P0/PRLP0/RPP0	PPH21138F
H06	N/A	SA_00105	HGDC	Human Genomic DNA Contamination	HIGX1A
H07	N/A	SA_00104	RTC	Reverse Transcription Control	RTC	PPX63340A
H08	N/A	SA_00104	RTC	Reverse Transcription Control	RTC	PPX63340A
H09	N/A	SA_00104	RTC	Reverse Transcription Control	RTC	PPX63340A
H10	N/A	SA_00103	PPC	Positive PCR Control	PPC
H11	N/A	SA_00103	PPC	Positive PCR Control	PPC
H12	N/A	SA_00103	PPC	Positive PCR Control	PPC

## Sheet: Average Ct
Position	Symbol	AVG Ct		Standard Deviation
		Control Group	Group 1	Control Group	Group 1
A01	ABL1	28.54	28.03	0.968143	0.338280
A02	AIFM1	28.03	27.09	1.045769	0.686246
A03	AKT1	26.16	26.03	1.251892	0.531445
A04	APAF1	29.63	28.65	1.077915	0.380044
A05	BAD	28.09	28.17	0.933506	0.238956
A06	BAG1	30.56	29.53	0.988753	0.756241
A07	BAG3	26.52	25.99	1.154701	0.640651
A08	BAK1	29.03	28.61	1.247437	0.497427
A09	BAX	26.23	25.81	1.039054	0.266333
A10	BCL10	28.29	27.64	0.879223	0.383145
A11	BCL2	30.76	30.81	1.791098	0.415492
A12	BCL2A1	35.00	35.00	0.000000	0.000000
B01	BCL2L1	26.76	26.19	2.035321	0.828633
B02	BCL2L10	35.00	33.67	0.000000	1.215771
B03	BCL2L11	30.42	30.13	1.234666	0.380175
B04	BCL2L2	27.55	26.89	1.098317	0.512868
B05	BFAR	27.27	27.12	1.320202	0.446019
B06	BID	26.52	25.77	1.054324	0.447102
B07	BIK	28.27	27.51	1.376517	0.386566
B08	BIRC2	27.80	26.93	1.117870	0.528488
B09	BIRC3	31.70	30.27	0.740698	0.647019
B10	BIRC5	28.93	28.22	0.857496	0.745050
B11	BIRC6	28.07	27.07	0.996243	0.587055
B12	BNIP2	27.29	26.52	1.011154	0.338280
C01	BNIP3	25.95	25.61	0.639062	0.230290
C02	BNIP3L	28.77	27.74	0.809877	0.327414
C03	BRAF	31.66	30.84	1.039679	0.390384
C04	CASP1	35.00	34.93	0.000000	0.121244
C05	CASP10	32.85	34.53	0.415251	0.726659
C06	CASP14	35.00	34.61	0.000000	0.519647
C07	CASP2	27.03	26.67	1.161737	0.415812
C08	CASP3	28.38	27.68	1.186859	0.404475
C09	CASP4	29.59	27.96	1.001665	0.572043
C10	CASP5	35.00	35.00	0.000000	0.000000
C11	CASP6	28.83	28.11	0.828312	0.464363
C12	CASP7	28.09	27.95	1.164231	0.282194
D01	CASP8	28.38	27.86	1.235246	0.565184
D02	CASP9	29.48	28.32	0.869329	0.632166
D03	CD27	32.50	30.75	1.042161	1.160862
D04	CD40	28.82	28.41	0.948754	0.383145
D05	CD40LG	32.59	31.41	0.453468	0.625007
D06	CD70	34.94	33.28	0.098150	1.056614
D07	CFLAR	28.57	28.03	1.599542	0.681347
D08	CIDEA	34.51	33.53	0.100167	0.561070
D09	CIDEB	27.68	27.68	1.372917	0.785005
D10	CRADD	31.64	30.73	1.155610	0.653095
D11	CYCS	29.99	27.74	1.718924	0.766877
D12	DAPK1	34.57	34.98	0.372693	0.040415
E01	DFFA	26.49	26.10	1.260516	0.468224
E02	DIABLO	27.25	27.01	1.349086	0.450037
E03	FADD	27.88	27.59	1.430629	0.387599
E04	FAS	28.18	27.00	1.301550	0.438634
E05	FASLG	33.18	31.96	0.265141	0.751620
E06	GADD45A	29.49	28.52	1.160517	0.360139
E07	HRK	30.48	30.48	0.843267	0.542863
E08	IGF1R	30.76	30.37	1.176053	0.390512
E09	IL10	34.90	34.01	0.173205	0.611746
E10	LTA	32.33	31.09	0.470319	0.761665
E11	LTBR	26.53	26.31	1.428367	0.421466
E12	MCL1	26.12	25.31	1.265082	0.585064
F01	NAIP	29.92	29.08	1.140278	0.487750
F02	NFKB1	28.09	27.91	1.370219	0.523737
F03	NOD1	30.89	30.31	1.170057	0.497293
F04	NOL3	27.26	27.16	1.184919	0.398790
F05	PYCARD	32.50	31.70	0.557345	0.573760
F06	RIPK2	27.40	26.89	0.996059	0.535942
F07	TNF	35.00	35.00	0.000000	0.000000
F08	TNFRSF10A	28.43	27.79	1.645519	0.615549
F09	TNFRSF10B	27.23	26.72	1.254844	0.476060
F10	TNFRSF11B	35.00	35.00	0.000000	0.000000
F11	TNFRSF1A	27.31	27.09	1.109610	0.187172
F12	TNFRSF1B	34.03	32.55	0.498698	0.997112
G01	TNFRSF21	27.10	26.40	1.522268	0.663023
G02	TNFRSF25	30.76	30.79	1.460924	0.758046
G03	TNFRSF9	34.43	33.58	0.531131	0.991077
G04	TNFSF10	30.53	30.57	0.420991	1.159928
G05	TNFSF8	34.96	34.32	0.063509	0.643143
G06	TP53	26.49	25.98	1.026791	0.287286
G07	TP53BP2	27.58	27.03	1.377002	0.555188
G08	TP73	30.48	29.65	0.554617	0.525389
G09	TRADD	30.76	30.32	0.593492	0.400541
G10	TRAF2	27.99	28.28	1.556096	0.840377
G11	TRAF3	26.95	27.01	1.135312	0.560387
G12	XIAP	29.01	28.22	1.408971	0.462853
H01	ACTB	20.29	19.94	1.517674	0.658357
H02	B2M	24.48	23.24	1.095643	0.588756
H03	GAPDH	20.73	20.55	1.232234	0.433167
H04	HPRT1	26.75	26.36	1.137673	0.456107
H05	RPLP0	19.80	19.05	1.131607	0.540123

## Sheet: Average Delta(Ct)
Position	Symbol	AVG Delta(Ct) (Ct(GOI) - Ave Ct(HKG))		Standard Deviation
		Control Group	Group 1	Control Group	Group 1
A01	ABL1	0.29	0.16	0.350559	0.074145
A02	AIFM1	-0.22	-0.77	0.426944	0.395083
A03	AKT1	-2.09	-1.84	0.657426	0.623077
A04	APAF1	1.38	0.78	0.459089	0.310212
A05	BAD	-0.16	0.30	0.325401	0.430081
A06	BAG1	2.31	1.66	0.382512	0.448163
A07	BAG3	-1.73	-1.88	0.552087	0.339779
A08	BAK1	0.78	0.74	0.639398	0.188781
A09	BAX	-2.02	-2.05	0.425716	0.313945
A10	BCL10	0.04	-0.23	0.277715	0.188428
A11	BCL2	2.51	2.95	1.282988	0.109637
A12	BCL2A1	6.75	7.13	0.618836	0.308818
B01	BCL2L1	-1.49	-1.68	1.419030	0.843728
B02	BCL2L10	6.75	5.80	0.618836	0.969957
B03	BCL2L11	2.17	2.27	0.621573	0.305741
B04	BCL2L2	-0.70	-0.97	0.489460	0.205265
B05	BFAR	-0.98	-0.75	0.709538	0.461492
B06	BID	-1.73	-2.10	0.452228	0.159875
B07	BIK	0.02	-0.36	0.758982	0.194201
B08	BIRC2	-0.45	-0.94	0.499093	0.219678
B09	BIRC3	3.45	2.40	0.140086	0.365679
B10	BIRC5	0.68	0.35	0.247515	0.440727
B11	BIRC6	-0.18	-0.80	0.391406	0.278651
B12	BNIP2	-0.96	-1.35	0.394064	0.192559
C01	BNIP3	-2.30	-2.25	0.044782	0.080665
C02	BNIP3L	0.52	-0.13	0.194577	0.106891
C03	BRAF	3.41	2.97	0.423225	0.099387
C04	CASP1	6.75	7.06	0.618836	0.223910
C05	CASP10	4.60	6.66	0.286752	0.534416
C06	CASP14	6.75	6.74	0.618836	0.361029
C07	CASP2	-1.22	-1.20	0.547297	0.431521
C08	CASP3	0.13	-0.19	0.626744	0.223065
C09	CASP4	1.34	0.10	0.452910	0.263703
C10	CASP5	6.75	7.13	0.618836	0.308818
C11	CASP6	0.58	0.24	0.237210	0.183250
C12	CASP7	-0.16	0.08	0.545651	0.156517
D01	CASP8	0.13	-0.00	0.650260	0.561759
D02	CASP9	1.23	0.46	0.297653	0.392269
D03	CD27	4.25	2.88	1.457031	0.926402
D04	CD40	0.57	0.54	0.331660	0.126769
D05	CD40LG	4.34	3.55	0.193621	0.320177
D06	CD70	6.69	5.42	0.715938	0.884543
D07	CFLAR	0.32	0.17	0.995794	0.640159
D08	CIDEA	6.26	5.66	0.616975	0.263250
D09	CIDEB	-0.57	-0.19	0.790723	0.893002
D10	CRADD	3.39	2.86	0.605864	0.357722
D11	CYCS	1.74	-0.13	1.124661	0.489875
D12	DAPK1	6.32	7.11	0.252474	0.277532
E01	DFFA	-1.76	-1.77	0.642235	0.411730
E02	DIABLO	-1.00	-0.86	0.734097	0.452007
E03	FADD	-0.37	-0.28	0.825432	0.407022
E04	FAS	-0.07	-0.87	0.739322	0.133063
E05	FASLG	4.93	4.10	0.403411	0.475181
E06	GADD45A	1.24	0.65	0.575979	0.053940
E07	HRK	2.23	2.61	0.237270	0.256386
E08	IGF1R	2.51	2.50	0.569145	0.484294
E09	IL10	6.65	6.14	0.790368	0.314517
E10	LTA	4.08	3.22	0.674271	0.474695
E11	LTBR	-1.72	-1.56	0.812966	0.436485
E12	MCL1	-2.13	-2.56	0.659316	0.279795
F01	NAIP	1.67	1.21	0.524580	0.445343
F02	NFKB1	-0.16	0.04	0.752512	0.475448
F03	NOD1	2.64	2.44	0.552879	0.306591
F04	NOL3	-0.99	-0.71	0.566820	0.367754
F05	PYCARD	4.25	3.83	0.098172	0.296396
F06	RIPK2	-0.85	-0.98	0.384733	0.228434
F07	TNF	6.75	7.13	0.618836	0.308818
F08	TNFRSF10A	0.18	-0.08	1.044368	0.483412
F09	TNFRSF10B	-1.02	-1.15	0.657215	0.506483
F10	TNFRSF11B	6.75	7.13	0.618836	0.308818
F11	TNFRSF1A	-0.94	-0.77	0.490846	0.367713
F12	TNFRSF1B	5.78	4.69	0.808417	0.715360
G01	TNFRSF21	-1.15	-1.47	0.916657	0.425035
G02	TNFRSF25	2.51	2.93	0.898382	0.831670
G03	TNFRSF9	6.18	5.71	0.553497	0.740555
G04	TNFSF10	2.28	2.70	0.239272	0.870850
G05	TNFSF8	6.71	6.46	0.599032	0.334450
G06	TP53	-1.76	-1.89	0.475316	0.355578
G07	TP53BP2	-0.67	-0.84	0.773813	0.436975
G08	TP73	2.23	1.79	0.095727	0.240905
G09	TRADD	2.51	2.45	0.055460	0.093213
G10	TRAF2	-0.26	0.42	0.943372	0.939791
G11	TRAF3	-1.30	-0.86	0.521116	0.616833
G12	XIAP	0.76	0.35	0.799469	0.233688
H01	ACTB	-7.96	-7.92	0.922261	0.564864
H02	B2M	-3.77	-4.63	0.549004	0.279951
H03	GAPDH	-7.52	-7.32	0.613704	0.436674
H04	HPRT1	-1.50	-1.50	0.519567	0.210715
H05	RPLP0	-8.45	-8.81	0.545521	0.234738

## Sheet: 2^(-Avg.(Delta(Ct))
Position	Symbol	2^(-Avg.(Delta(Ct))
		Control Group	Group 1
A01	ABL1	0.818584	0.894550
A02	AIFM1	1.168401	1.708306
A03	AKT1	4.270885	3.578199
A04	APAF1	0.384539	0.582057
A05	BAD	1.115637	0.809947
A06	BAG1	0.201363	0.315541
A07	BAG3	3.327722	3.678795
A08	BAK1	0.582852	0.598421
A09	BAX	4.049850	4.148434
A10	BCL10	0.975717	1.169507
A11	BCL2	0.175296	0.129639
A12	BCL2A1	0.009298	0.007119
B01	BCL2L1	2.804742	3.202577
B02	BCL2L10	0.009298	0.017897
B03	BCL2L11	0.222396	0.207699
B04	BCL2L2	1.625858	1.962329
B05	BFAR	1.969553	1.680899
B06	BID	3.320042	4.274928
B07	BIK	0.987055	1.282744
B08	BIRC2	1.364023	1.913084
B09	BIRC3	0.091370	0.189364
B10	BIRC5	0.624685	0.782358
B11	BIRC6	1.133828	1.740176
B12	BNIP2	1.951434	2.547767
C01	BNIP3	4.928681	4.765299
C02	BNIP3L	0.697953	1.091188
C03	BRAF	0.094374	0.127264
C04	CASP1	0.009298	0.007473
C05	CASP10	0.041174	0.009883
C06	CASP14	0.009298	0.009350
C07	CASP2	2.336801	2.290877
C08	CASP3	0.916709	1.137526
C09	CASP4	0.396264	0.934694
C10	CASP5	0.009298	0.007119
C11	CASP6	0.669521	0.846296
C12	CASP7	1.120805	0.945555
D01	CASP8	0.912482	1.001781
D02	CASP9	0.427660	0.728281
D03	CD27	0.052600	0.135456
D04	CD40	0.675738	0.685819
D05	CD40LG	0.049533	0.085530
D06	CD70	0.009671	0.023399
D07	CFLAR	0.799887	0.890425
D08	CIDEA	0.013089	0.019721
D09	CIDEB	1.485761	1.140158
D10	CRADD	0.095250	0.137665
D11	CYCS	0.299619	1.091188
D12	DAPK1	0.012527	0.007235
E01	DFFA	3.389804	3.408728
E02	DIABLO	2.006297	1.814074
E03	FADD	1.293430	1.213550
E04	FAS	1.048167	1.822476
E05	FASLG	0.032831	0.058418
E06	GADD45A	0.423725	0.635472
E07	HRK	0.213336	0.163334
E08	IGF1R	0.175702	0.176275
E09	IL10	0.009966	0.014172
E10	LTA	0.059178	0.107264
E11	LTBR	3.304736	2.946972
E12	MCL1	4.390956	5.880342
F01	NAIP	0.315243	0.431042
F02	NFKB1	1.118218	0.969895
F03	NOD1	0.160933	0.183761
F04	NOL3	1.992438	1.634935
F05	PYCARD	0.052721	0.070117
F06	RIPK2	1.808176	1.971418
F07	TNF	0.009298	0.007119
F08	TNFRSF10A	0.881400	1.054018
F09	TNFRSF10B	2.034304	2.217960
F10	TNFRSF11B	0.009298	0.007119
F11	TNFRSF1A	1.924568	1.708306
F12	TNFRSF1B	0.018214	0.038810
G01	TNFRSF21	2.220988	2.762358
G02	TNFRSF25	0.175702	0.131448
G03	TNFRSF9	0.013804	0.019094
G04	TNFSF10	0.206546	0.153811
G05	TNFSF8	0.009538	0.011379
G06	TP53	3.389804	3.704383
G07	TP53BP2	1.588724	1.789099
G08	TP73	0.213336	0.289687
G09	TRADD	0.176108	0.182913
G10	TRAF2	1.201249	0.748756
G11	TRAF3	2.470041	1.814074
G12	XIAP	0.590988	0.784167
H01	ACTB	249.783607	242.622032
H02	B2M	13.622016	24.747887
H03	GAPDH	183.699215	159.701430
H04	HPRT1	2.830784	2.833464
H05	RPLP0	350.807307	449.621357

## Sheet: Fold Change
Position	Symbol	Fold Change (comparing to control group)
		Group 1
		Fold Change	Comments
A01	ABL1	1.09
A02	AIFM1	1.46
A03	AKT1	0.84
A04	APAF1	1.51
A05	BAD	0.73
A06	BAG1	1.57	A
A07	BAG3	1.11
A08	BAK1	1.03
A09	BAX	1.02
A10	BCL10	1.20
A11	BCL2	0.74	B
A12	BCL2A1	0.77	C
B01	BCL2L1	1.14
B02	BCL2L10	1.92	B
B03	BCL2L11	0.93	B
B04	BCL2L2	1.21
B05	BFAR	0.85
B06	BID	1.29
B07	BIK	1.30
B08	BIRC2	1.40
B09	BIRC3	2.07
B10	BIRC5	1.25
B11	BIRC6	1.53
B12	BNIP2	1.31
C01	BNIP3	0.97
C02	BNIP3L	1.56
C03	BRAF	1.35	B
C04	CASP1	0.80	B
C05	CASP10	0.24
C06	CASP14	1.01	B
C07	CASP2	0.98
C08	CASP3	1.24
C09	CASP4	2.36
C10	CASP5	0.77	C
C11	CASP6	1.26
C12	CASP7	0.84
D01	CASP8	1.10
D02	CASP9	1.70
D03	CD27	2.58	B
D04	CD40	1.01
D05	CD40LG	1.73
D06	CD70	2.42	B
D07	CFLAR	1.11
D08	CIDEA	1.51	B
D09	CIDEB	0.77
D10	CRADD	1.45	B
D11	CYCS	3.64
D12	DAPK1	0.58
E01	DFFA	1.01
E02	DIABLO	0.90
E03	FADD	0.94
E04	FAS	1.74
E05	FASLG	1.78	B
E06	GADD45A	1.50
E07	HRK	0.77	B
E08	IGF1R	1.00	B
E09	IL10	1.42	B
E10	LTA	1.81	B
E11	LTBR	0.89
E12	MCL1	1.34
F01	NAIP	1.37
F02	NFKB1	0.87
F03	NOD1	1.14	B
F04	NOL3	0.82
F05	PYCARD	1.33	B
F06	RIPK2	1.09
F07	TNF	0.77	C
F08	TNFRSF10A	1.20
F09	TNFRSF10B	1.09
F10	TNFRSF11B	0.77	C
F11	TNFRSF1A	0.89
F12	TNFRSF1B	2.13	B
G01	TNFRSF21	1.24
G02	TNFRSF25	0.75	B
G03	TNFRSF9	1.38	B
G04	TNFSF10	0.74	B
G05	TNFSF8	1.19	B
G06	TP53	1.09
G07	TP53BP2	1.13
G08	TP73	1.36	A
G09	TRADD	1.04	B
G10	TRAF2	0.62
G11	TRAF3	0.73
G12	XIAP	1.33
H01	ACTB	0.97
H02	B2M	1.82
H03	GAPDH	0.87
H04	HPRT1	1.00
H05	RPLP0	1.28

## Sheet: p-value
Position	Symbol	p-value (comparing to control group)
		Group 1
A01	ABL1	0.610866
A02	AIFM1	0.186441
A03	AKT1	0.625773
A04	APAF1	0.123506
A05	BAD	0.187109
A06	BAG1	0.130302
A07	BAG3	0.771912
A08	BAK1	0.912715
A09	BAX	0.953499
A10	BCL10	0.259451
A11	BCL2	0.462527
A12	BCL2A1	0.389450
B01	BCL2L1	0.978701
B02	BCL2L10	0.295506
B03	BCL2L11	0.699258
B04	BCL2L2	0.461888
B05	BFAR	0.577276
B06	BID	0.269532
B07	BIK	0.486968
B08	BIRC2	0.165979
B09	BIRC3	0.028642
B10	BIRC5	0.323894
B11	BIRC6	0.079222
B12	BNIP2	0.190054
C01	BNIP3	0.423255
C02	BNIP3L	0.004934
C03	BRAF	0.133681
C04	CASP1	0.431545
C05	CASP10	0.004110
C06	CASP14	0.903840
C07	CASP2	0.898957
C08	CASP3	0.579537
C09	CASP4	0.012707
C10	CASP5	0.389450
C11	CASP6	0.129494
C12	CASP7	0.399696
D01	CASP8	0.836511
D02	CASP9	0.079255
D03	CD27	0.271908
D04	CD40	0.997964
D05	CD40LG	0.035667
D06	CD70	0.176779
D07	CFLAR	0.953608
D08	CIDEA	0.238938
D09	CIDEB	0.618050
D10	CRADD	0.306097
D11	CYCS	0.043860
D12	DAPK1	0.026434
E01	DFFA	0.928162
E02	DIABLO	0.674479
E03	FADD	0.714531
E04	FAS	0.137509
E05	FASLG	0.116707
E06	GADD45A	0.148542
E07	HRK	0.125440
E08	IGF1R	0.969906
E09	IL10	0.478014
E10	LTA	0.146920
E11	LTBR	0.629285
E12	MCL1	0.404256
F01	NAIP	0.324522
F02	NFKB1	0.607789
F03	NOD1	0.673629
F04	NOL3	0.441873
F05	PYCARD	0.091548
F06	RIPK2	0.698279
F07	TNF	0.389450
F08	TNFRSF10A	0.903881
F09	TNFRSF10B	0.863628
F10	TNFRSF11B	0.389450
F11	TNFRSF1A	0.586072
F12	TNFRSF1B	0.190545
G01	TNFRSF21	0.753879
G02	TNFRSF25	0.568834
G03	TNFRSF9	0.425358
G04	TNFSF10	0.502168
G05	TNFSF8	0.650280
G06	TP53	0.783006
G07	TP53BP2	0.871414
G08	TP73	0.060914
G09	TRADD	0.419706
G10	TRAF2	0.391064
G11	TRAF3	0.392839
G12	XIAP	0.526758
H01	ACTB	0.818915
H02	B2M	0.068683
H03	GAPDH	0.592025
H04	HPRT1	0.884050
H05	RPLP0	0.406502

## Sheet: Fold Regulation
Position	Symbol	Up-Down Regulation (comparing to control group)
		Group 1
		Fold Regulation	Comments
A01	ABL1	1.09
A02	AIFM1	1.46
A03	AKT1	-1.19
A04	APAF1	1.51
A05	BAD	-1.38
A06	BAG1	1.57	A
A07	BAG3	1.11
A08	BAK1	1.03
A09	BAX	1.02
A10	BCL10	1.20
A11	BCL2	-1.35	B
A12	BCL2A1	-1.31	C
B01	BCL2L1	1.14
B02	BCL2L10	1.92	B
B03	BCL2L11	-1.07	B
B04	BCL2L2	1.21
B05	BFAR	-1.17
B06	BID	1.29
B07	BIK	1.30
B08	BIRC2	1.40
B09	BIRC3	2.07
B10	BIRC5	1.25
B11	BIRC6	1.53
B12	BNIP2	1.31
C01	BNIP3	-1.03
C02	BNIP3L	1.56
C03	BRAF	1.35	B
C04	CASP1	-1.24	B
C05	CASP10	-4.17
C06	CASP14	1.01	B
C07	CASP2	-1.02
C08	CASP3	1.24
C09	CASP4	2.36
C10	CASP5	-1.31	C
C11	CASP6	1.26
C12	CASP7	-1.19
D01	CASP8	1.10
D02	CASP9	1.70
D03	CD27	2.58	B
D04	CD40	1.01
D05	CD40LG	1.73
D06	CD70	2.42	B
D07	CFLAR	1.11
D08	CIDEA	1.51	B
D09	CIDEB	-1.30
D10	CRADD	1.45	B
D11	CYCS	3.64
D12	DAPK1	-1.73
E01	DFFA	1.01
E02	DIABLO	-1.11
E03	FADD	-1.07
E04	FAS	1.74
E05	FASLG	1.78	B
E06	GADD45A	1.50
E07	HRK	-1.31	B
E08	IGF1R	1.00	B
E09	IL10	1.42	B
E10	LTA	1.81	B
E11	LTBR	-1.12
E12	MCL1	1.34
F01	NAIP	1.37
F02	NFKB1	-1.15
F03	NOD1	1.14	B
F04	NOL3	-1.22
F05	PYCARD	1.33	B
F06	RIPK2	1.09
F07	TNF	-1.31	C
F08	TNFRSF10A	1.20
F09	TNFRSF10B	1.09
F10	TNFRSF11B	-1.31	C
F11	TNFRSF1A	-1.13
F12	TNFRSF1B	2.13	B
G01	TNFRSF21	1.24
G02	TNFRSF25	-1.34	B
G03	TNFRSF9	1.38	B
G04	TNFSF10	-1.34	B
G05	TNFSF8	1.19	B
G06	TP53	1.09
G07	TP53BP2	1.13
G08	TP73	1.36	A
G09	TRADD	1.04	B
G10	TRAF2	-1.60
G11	TRAF3	-1.36
G12	XIAP	1.33
H01	ACTB	-1.03
H02	B2M	1.82
H03	GAPDH	-1.15
H04	HPRT1	1.00
H05	RPLP0	1.28
