# Supplementary material for: Oxaliplatin resistance in colorectal cancer enhances TRAIL sensitivity via death receptor 4 upregulation and lipid raft localization
Source: eLife. 2021 Aug 3;10:e67750. doi: 10.7554/eLife.67750 (PMC8331188; doi:10.7554/eLife.67750)
Supplement: Figure 2—source data 2. [file elife-67750-fig2-data2.xlsx]

## Sheet: Gene Table
PCR Array Catalog #:		PAHS-012Z
Position	Unigene	Refseq	Symbol	Description	Gname	RT2 Catalog
A01	Hs.431048	NM_005157	ABL1	C-abl oncogene 1, non-receptor tyrosine kinase	ABL/JTK7/bcr/abl/c-ABL/c-ABL1/p150/v-abl	PPH00087E
A02	Hs.424932	NM_004208	AIFM1	Apoptosis-inducing factor, mitochondrion-associated, 1	AIF/CMT2D/CMTX4/COWCK/COXPD6/NADMR/NAMSD/PDCD8	PPH01037A
A03	Hs.525622	NM_005163	AKT1	V-akt murine thymoma viral oncogene homolog 1	AKT/CWS6/PKB/PKB-ALPHA/PRKBA/RAC/RAC-ALPHA	PPH00088B
A04	Hs.552567	NM_001160	APAF1	Apoptotic peptidase activating factor 1	APAF-1/CED4	PPH00752A
A05	Hs.370254	NM_004322	BAD	BCL2-associated agonist of cell death	BBC2/BCL2L8	PPH00075C
A06	Hs.377484	NM_004323	BAG1	BCL2-associated athanogene	BAG-1/HAP/RAP46	PPH00076F
A07	Hs.523309	NM_004281	BAG3	BCL2-associated athanogene 3	BAG-3/BIS/CAIR-1/MFM6	PPH01036C
A08	Hs.485139	NM_001188	BAK1	BCL2-antagonist/killer 1	BAK/BAK-LIKE/BCL2L7/CDN1	PPH00077F
A09	Hs.624291	NM_004324	BAX	BCL2-associated X protein	BCL2L4	PPH00078B
A10	Hs.193516	NM_003921	BCL10	B-cell CLL/lymphoma 10	CARMEN/CIPER/CLAP/IMD37/c-E10/mE10	PPH00890F
A11	Hs.150749	NM_000633	BCL2	B-cell CLL/lymphoma 2	Bcl-2/PPP1R50	PPH00079B
A12	Hs.227817	NM_004049	BCL2A1	BCL2-related protein A1	ACC-1/ACC-2/ACC1/ACC2/BCL2L5/BFL1/GRS/HBPA1	PPH00365F
B01	Hs.516966	NM_138578	BCL2L1	BCL2-like 1	BCL-XL/S/BCL2L/BCLX/BCLXL/BCLXS/Bcl-X/PPP1R52/bcl-xL/bcl-xS	PPH00082C
B02	Hs.283672	NM_020396	BCL2L10	BCL2-like 10 (apoptosis facilitator)	BCL-B/Boo/Diva/bcl2-L-10	PPH15924B
B03	Hs.469658	NM_006538	BCL2L11	BCL2-like 11 (apoptosis facilitator)	BAM/BIM/BOD	PPH00893F
B04	Hs.410026	NM_004050	BCL2L2	BCL2-like 2	BCL-W/BCL2-L-2/BCLW/PPP1R51	PPH00081E
B05	Hs.435556	NM_016561	BFAR	Bifunctional apoptosis regulator	BAR/RNF47	PPH00887C
B06	Hs.517145	NM_001196	BID	BH3 interacting domain death agonist	FP497	PPH00084C
B07	Hs.475055	NM_001197	BIK	BCL2-interacting killer (apoptosis-inducing)	BIP1/BP4/NBK	PPH00363C
B08	Hs.696238	NM_001166	BIRC2	Baculoviral IAP repeat containing 2	API1/HIAP2/Hiap-2/MIHB/RNF48/c-IAP1/cIAP1	PPH00340B
B09	Hs.127799	NM_001165	BIRC3	Baculoviral IAP repeat containing 3	AIP1/API2/CIAP2/HAIP1/HIAP1/MALT2/MIHC/RNF49/c-IAP2	PPH00326B
B10	Hs.744872	NM_001168	BIRC5	Baculoviral IAP repeat containing 5	API4/EPR-1	PPH00271E
B11	Hs.150107	NM_016252	BIRC6	Baculoviral IAP repeat containing 6	APOLLON/BRUCE	PPH00900F
B12	Hs.646490	NM_004330	BNIP2	BCL2/adenovirus E1B 19kDa interacting protein 2	BNIP-2/NIP2	PPH14371F
C01	Hs.144873	NM_004052	BNIP3	BCL2/adenovirus E1B 19kDa interacting protein 3	NIP3	PPH00301C
C02	Hs.131226	NM_004331	BNIP3L	BCL2/adenovirus E1B 19kDa interacting protein 3-like	BNIP3a/NIX	PPH12205C
C03	Hs.550061	NM_004333	BRAF	V-raf murine sarcoma viral oncogene homolog B1	B-RAF1/BRAF1/NS7/RAFB1	PPH00712A
C04	Hs.2490	NM_033292	CASP1	Caspase 1, apoptosis-related cysteine peptidase (interleukin 1, beta, convertase)	ICE/IL1BC/P45	PPH00105C
C05	Hs.5353	NM_001230	CASP10	Caspase 10, apoptosis-related cysteine peptidase	ALPS2/FLICE2/MCH4	PPH00106F
C06	Hs.466057	NM_012114	CASP14	Caspase 14, apoptosis-related cysteine peptidase	-	PPH00898B
C07	Hs.368982	NM_032982	CASP2	Caspase 2, apoptosis-related cysteine peptidase	CASP-2/ICH1/NEDD-2/NEDD2/PPP1R57	PPH00111A
C08	Hs.141125	NM_004346	CASP3	Caspase 3, apoptosis-related cysteine peptidase	CPP32/CPP32B/SCA-1	PPH00107C
C09	Hs.138378	NM_001225	CASP4	Caspase 4, apoptosis-related cysteine peptidase	ICE(rel)II/ICEREL-II/ICH-2/Mih1/TX/TX	PPH00366F
C10	Hs.213327	NM_004347	CASP5	Caspase 5, apoptosis-related cysteine peptidase	ICE(rel)III/ICEREL-III/ICH-3	PPH00108G
C11	Hs.654616	NM_032992	CASP6	Caspase 6, apoptosis-related cysteine peptidase	MCH2	PPH00109B
C12	Hs.9216	NM_001227	CASP7	Caspase 7, apoptosis-related cysteine peptidase	CASP-7/CMH-1/ICE-LAP3/LICE2/MCH3	PPH00110C
D01	Hs.599762	NM_001228	CASP8	Caspase 8, apoptosis-related cysteine peptidase	ALPS2B/CAP4/Casp-8/FLICE/MACH/MCH5	PPH00359F
D02	Hs.329502	NM_001229	CASP9	Caspase 9, apoptosis-related cysteine peptidase	APAF-3/APAF3/ICE-LAP6/MCH6/PPP1R56	PPH00353B
D03	Hs.355307	NM_001242	CD27	CD27 molecule	S152/S152. LPFS2/T14/TNFRSF7/Tp55	PPH00269F
D04	Hs.472860	NM_001250	CD40	CD40 molecule, TNF receptor superfamily member 5	Bp50/CDW40/TNFRSF5/p50	PPH00296D
D05	Hs.592244	NM_000074	CD40LG	CD40 ligand	CD154/CD40L/HIGM1/IGM/IMD3/T-BAM/TNFSF5/TRAP/gp39/hCD40L	PPH00259C
D06	Hs.501497	NM_001252	CD70	CD70 molecule	CD27L/CD27LG/TNFSF7	PPH00258F
D07	Hs.390736	NM_003879	CFLAR	CASP8 and FADD-like apoptosis regulator	CASH/CASP8AP1/CLARP/Casper/FLAME/FLAME-1/FLAME1/FLIP/I-FLICE/MRIT/c-FLIP/c-FLIPL/c-FLIPR/c-FLIPS	PPH00333B
D08	Hs.249129	NM_001279	CIDEA	Cell death-inducing DFFA-like effector a	CIDE-A	PPH00899C
D09	Hs.642693	NM_014430	CIDEB	Cell death-inducing DFFA-like effector b	-	PPH00913C
D10	Hs.38533	NM_003805	CRADD	CASP2 and RIPK1 domain containing adaptor with death domain	MRT34/RAIDD	PPH00334C
D11	Hs.437060	NM_018947	CYCS	Cytochrome c, somatic	CYC/HCS/THC4	PPH20675F
D12	Hs.380277	NM_004938	DAPK1	Death-associated protein kinase 1	DAPK	PPH00273F
E01	Hs.484782	NM_004401	DFFA	DNA fragmentation factor, 45kDa, alpha polypeptide	DFF-45/DFF1/ICAD	PPH00285C
E02	Hs.169611	NM_019887	DIABLO	Diablo, IAP-binding mitochondrial protein	DFNA64/SMAC	PPH05797A
E03	Hs.86131	NM_003824	FADD	Fas (TNFRSF6)-associated via death domain	GIG3/MORT1	PPH00367A
E04	Hs.667309	NM_000043	FAS	Fas (TNF receptor superfamily, member 6)	ALPS1A/APO-1/APT1/CD95/FAS1/FASTM/TNFRSF6	PPH00141B
E05	Hs.2007	NM_000639	FASLG	Fas ligand (TNF superfamily, member 6)	ALPS1B/APT1LG1/APTL/CD178/CD95-L/CD95L/FASL/TNFSF6	PPH00142C
E06	Hs.80409	NM_001924	GADD45A	Growth arrest and DNA-damage-inducible, alpha	DDIT1/GADD45	PPH00148B
E07	Hs.87247	NM_003806	HRK	Harakiri, BCL2 interacting protein (contains only BH3 domain)	DP5/HARAKIRI	PPH00369B
E08	Hs.643120	NM_000875	IGF1R	Insulin-like growth factor 1 receptor	CD221/IGFIR/IGFR/JTK13	PPH00350F
E09	Hs.193717	NM_000572	IL10	Interleukin 10	CSIF/GVHDS/IL-10/IL10A/TGIF	PPH00572C
E10	Hs.36	NM_000595	LTA	Lymphotoxin alpha (TNF superfamily, member 1)	LT/TNFB/TNFSF1	PPH00337F
E11	Hs.1116	NM_002342	LTBR	Lymphotoxin beta receptor (TNFR superfamily, member 3)	CD18/D12S370/LT-BETA-R/TNF-R-III/TNFCR/TNFR-RP/TNFR2-RP/TNFR3/TNFRSF3	PPH00816C
E12	Hs.632486	NM_021960	MCL1	Myeloid cell leukemia sequence 1 (BCL2-related)	BCL2L3/EAT/MCL1-ES/MCL1L/MCL1S/Mcl-1/TM/bcl2-L-3/mcl1/EAT	PPH00397E
F01	Hs.646951	NM_004536	NAIP	NLR family, apoptosis inhibitory protein	BIRC1/NLRB1/psiNAIP	PPH00909E
F02	Hs.618430	NM_003998	NFKB1	Nuclear factor of kappa light polypeptide gene enhancer in B-cells 1	EBP-1/KBF1/NF-kB1/NF-kappa-B/NF-kappaB/NFKB-p105/NFKB-p50/NFkappaB/p105/p50	PPH00204F
F03	Hs.738731	NM_006092	NOD1	Nucleotide-binding oligomerization domain containing 1	CARD4/CLR7.1/NLRC1	PPH00891C
F04	Hs.513667	NM_003946	NOL3	Nucleolar protein 3 (apoptosis repressor with CARD domain)	ARC/FCM/MYP/NOP/NOP30	PPH00902F
F05	Hs.499094	NM_013258	PYCARD	PYD and CARD domain containing	ASC/CARD5/TMS/TMS-1/TMS1	PPH00907A
F06	Hs.103755	NM_003821	RIPK2	Receptor-interacting serine-threonine kinase 2	CARD3/CARDIAK/CCK/GIG30/RICK/RIP2	PPH00881C
F07	Hs.241570	NM_000594	TNF	Tumor necrosis factor	DIF/TNF-alpha/TNFA/TNFSF2	PPH00341F
F08	Hs.591834	NM_003844	TNFRSF10A	Tumor necrosis factor receptor superfamily, member 10a	APO2/CD261/DR4/TRAILR-1/TRAILR1	PPH00842A
F09	Hs.661668	NM_003842	TNFRSF10B	Tumor necrosis factor receptor superfamily, member 10b	CD262/DR5/KILLER/KILLER/DR5/TRAIL-R2/TRAILR2/TRICK2/TRICK2A/TRICK2B/TRICKB/ZTNFR9	PPH00241C
F10	Hs.81791	NM_002546	TNFRSF11B	Tumor necrosis factor receptor superfamily, member 11b	OCIF/OPG/PDB5/TR1	PPH01049B
F11	Hs.713833	NM_001065	TNFRSF1A	Tumor necrosis factor receptor superfamily, member 1A	CD120a/FPF/MS5/TBP1/TNF-R/TNF-R-I/TNF-R55/TNFAR/TNFR1/TNFR1-d2/TNFR55/TNFR60/p55/p55-R/p60	PPH00346C
F12	Hs.256278	NM_001066	TNFRSF1B	Tumor necrosis factor receptor superfamily, member 1B	CD120b/TBPII/TNF-R-II/TNF-R75/TNFBR/TNFR1B/TNFR2/TNFR80/p75/p75TNFR	PPH00348A
G01	Hs.443577	NM_014452	TNFRSF21	Tumor necrosis factor receptor superfamily, member 21	BM-018/CD358/DR6	PPH00262A
G02	Hs.462529	NM_003790	TNFRSF25	Tumor necrosis factor receptor superfamily, member 25	APO-3/DDR3/DR3/LARD/TNFRSF12/TR3/TRAMP/WSL-1/WSL-LR	PPH00349B
G03	Hs.738942	NM_001561	TNFRSF9	Tumor necrosis factor receptor superfamily, member 9	4-1BB/CD137/CDw137/ILA	PPH00827E
G04	Hs.478275	NM_003810	TNFSF10	Tumor necrosis factor (ligand) superfamily, member 10	APO2L/Apo-2L/CD253/TL2/TRAIL	PPH00242F
G05	Hs.654445	NM_001244	TNFSF8	Tumor necrosis factor (ligand) superfamily, member 8	CD153/CD30L/CD30LG	PPH00268A
G06	Hs.437460	NM_000546	TP53	Tumor protein p53	BCC7/LFS1/P53/TRP53	PPH00213F
G07	Hs.523968	NM_005426	TP53BP2	Tumor protein p53 binding protein, 2	53BP2/ASPP2/BBP/P53BP2/PPP1R13A	PPH00394F
G08	Hs.192132	NM_005427	TP73	Tumor protein p73	P73	PPH00725A
G09	Hs.460996	NM_003789	TRADD	TNFRSF1A-associated via death domain	Hs.89862	PPH00392F
G10	Hs.522506	NM_021138	TRAF2	TNF receptor-associated factor 2	MGC:45012/TRAP/TRAP3	PPH00352B
G11	Hs.510528	NM_003300	TRAF3	TNF receptor-associated factor 3	CAP-1/CAP1/CD40bp/CRAF1/IIAE5/LAP1	PPH00338A
G12	Hs.356076	NM_001167	XIAP	X-linked inhibitor of apoptosis	API3/BIRC4/IAP-3/ILP1/MIHA/XLP2/hIAP-3/hIAP3	PPH00323A
H01	Hs.520640	NM_001101	ACTB	Actin, beta	BRWS1/PS1TP5BP1	PPH00073G
H02	Hs.534255	NM_004048	B2M	Beta-2-microglobulin	-	PPH01094E
H03	Hs.592355	NM_002046	GAPDH	Glyceraldehyde-3-phosphate dehydrogenase	G3PD/GAPD/HEL-S-162eP	PPH00150F
H04	Hs.412707	NM_000194	HPRT1	Hypoxanthine phosphoribosyltransferase 1	HGPRT/HPRT	PPH01018C
H05	Hs.546285	NM_001002	RPLP0	Ribosomal protein, large, P0	L10E/LP0/P0/PRLP0/RPP0	PPH21138F
H06	N/A	SA_00105	HGDC	Human Genomic DNA Contamination	HIGX1A
H07	N/A	SA_00104	RTC	Reverse Transcription Control	RTC	PPX63340A
H08	N/A	SA_00104	RTC	Reverse Transcription Control	RTC	PPX63340A
H09	N/A	SA_00104	RTC	Reverse Transcription Control	RTC	PPX63340A
H10	N/A	SA_00103	PPC	Positive PCR Control	PPC
H11	N/A	SA_00103	PPC	Positive PCR Control	PPC
H12	N/A	SA_00103	PPC	Positive PCR Control	PPC

## Sheet: Average Ct
Position	Symbol	AVG Ct		Standard Deviation
		Control Group	Group 1	Control Group	Group 1
A01	ABL1	27.59	27.54	0.521664	1.01746
A02	AIFM1	26.04	26.08	0.395264	0.345881
A03	AKT1	25.58	25.45	0.790717	0.963033
A04	APAF1	28.45	28.08	0.650333	0.821239
A05	BAD	28.18	28.39	0.704367	0.795047
A06	BAG1	29.82	29.93	0.406325	0.275923
A07	BAG3	27.4	27.15	0.582838	0.488092
A08	BAK1	28.84	28.8	0.289194	0.25632
A09	BAX	25.5	25.45	0.646942	0.645781
A10	BCL10	28.14	27.75	0.56748	0.688065
A11	BCL2	31.25	31.12	0.329242	0.530031
A12	BCL2A1	35	35	0	0
B01	BCL2L1	25.55	25.89	0.788226	0.892132
B02	BCL2L10	33.84	33.46	0.291947	0.519359
B03	BCL2L11	28.66	28.01	0.794628	0.995205
B04	BCL2L2	27.36	27.47	0.525769	0.646297
B05	BFAR	27.06	26.82	0.560833	0.725465
B06	BID	25.47	25.18	0.401539	0.130128
B07	BIK	26.27	26.19	0.571168	0.185831
B08	BIRC2	27.17	27.06	0.459384	0.577264
B09	BIRC3	29.81	29.77	0.648151	0.529371
B10	BIRC5	28.32	28.28	0.372424	0.118462
B11	BIRC6	26.86	26.66	0.661891	0.727736
B12	BNIP2	27.01	26.77	0.699071	0.80077
C01	BNIP3	28.15	28.46	0.456399	0.678847
C02	BNIP3L	28.37	27.79	0.507445	0.617333
C03	BRAF	30.4	30.21	0.332916	0.891422
C04	CASP1	35	35	0	0
C05	CASP10	32.96	34.94	0.603683	0.09815
C06	CASP14	34.64	34.54	0.36	0.681493
C07	CASP2	25.48	25.5	0.863153	0.920018
C08	CASP3	26.68	26.62	0.661539	0.800521
C09	CASP4	26.82	26.97	0.564476	0.370045
C10	CASP5	35	35	0	0
C11	CASP6	28.66	28.65	0.515396	0.380395
C12	CASP7	29.13	28.99	0.68821	0.745945
D01	CASP8	28.85	28.72	0.759364	0.889288
D02	CASP9	28.05	27.7	0.346987	0.383145
D03	CD27	31.77	31.2	0.214554	0.763348
D04	CD40	33.68	32.87	0.805005	0.954096
D05	CD40LG	32.39	32.45	0.470319	0.990825
D06	CD70	34.93	34.67	0.070238	0.57735
D07	CFLAR	28.42	28.19	0.850431	0.832606
D08	CIDEA	34.52	34.29	0.323574	0.653784
D09	CIDEB	27.06	27.26	0.842991	1.17205
D10	CRADD	31.3	31.39	0.418688	0.771168
D11	CYCS	28.77	28.31	0.295127	0.60531
D12	DAPK1	35	35	0	0
E01	DFFA	26.48	26.25	0.832126	0.785621
E02	DIABLO	26.46	26.46	0.730023	0.810021
E03	FADD	26.77	26.82	0.87489	0.750489
E04	FAS	30.5	27.03	0.614898	0.84006
E05	FASLG	30.44	29.66	0.712671	1.3042
E06	GADD45A	27.39	26.71	0.819776	0.981699
E07	HRK	33.66	34.1	0.170392	0.843347
E08	IGF1R	27.41	27.34	0.77681	1.21595
E09	IL10	30.81	28.6	0.806164	1.30334
E10	LTA	32.6	32.47	0.772161	0.816884
E11	LTBR	26.03	25.64	0.894446	1.03036
E12	MCL1	25.31	24.99	0.193132	0.214554
F01	NAIP	27.63	26.85	0.647328	0.995707
F02	NFKB1	28.19	28.11	0.859438	1.06265
F03	NOD1	29.59	29.09	0.866622	0.98541
F04	NOL3	26.61	26	0.787803	0.751155
F05	PYCARD	29.33	32.55	0.402161	0.661211
F06	RIPK2	27.3	27.27	0.323471	0.532666
F07	TNF	35	35	0	0
F08	TNFRSF10A	28.22	27.65	0.966557	1.44946
F09	TNFRSF10B	27.16	26.87	0.952383	1.21146
F10	TNFRSF11B	32.56	28.21	0.286182	1.19528
F11	TNFRSF1A	26.97	26.52	0.966282	1.28943
F12	TNFRSF1B	27.25	26.59	0.950158	1.4938
G01	TNFRSF21	27.27	26.69	0.964434	0.990774
G02	TNFRSF25	30.52	29.59	1.14333	1.44133
G03	TNFRSF9	34.98	34.72	0.028868	0.380044
G04	TNFSF10	28.48	28.41	0.375011	0.6634
G05	TNFSF8	34.59	34.63	0.285832	0.640859
G06	TP53	24.73	25.22	1.10256	1.18145
G07	TP53BP2	27.43	26.97	0.691761	1.08337
G08	TP73	31.27	30.48	0.458839	0.621477
G09	TRADD	30.05	29.91	0.806494	0.99955
G10	TRAF2	27.49	27.64	1.01673	1.52041
G11	TRAF3	26.91	27.03	0.693421	1.12055
G12	XIAP	27.02	26.7	0.980221	1.32102
H01	ACTB	19.43	19.51	0.783135	0.944951
H02	B2M	23.29	22.75	0.505404	0.716263
H03	GAPDH	20.77	20.54	0.895005	1.01791
H04	HPRT1	24.66	24.55	0.550485	0.591974
H05	RPLP0	19.27	19.42	0.366652	0.395264
H06	HGDC	34.74	34.89	0.450333	0.184752
H07	RTC	23.29	23.14	0.337095	0.187172
H08	RTC	23.34	23.28	0.324191	0.247857
H09	RTC	23.3	23.23	0.363731	0.166533
H10	PPC	21.4	21.42	0.075498	0.133167
H11	PPC	21.41	21.46	0.023094	0.144684
H12	PPC	21.6	21.58	0.163707	0.113578

## Sheet: Average Delta(Ct)
Position	Symbol	AVG Delta(Ct) (Ct(GOI) - Ave Ct(HKG))		Standard Deviation
		Control Group	Group 1	Control Group	Group 1
A01	ABL1	6.10267	6.19133	0.469852	0.44989
A02	AIFM1	4.55933	4.73133	0.214199	0.400801
A03	AKT1	4.09267	4.10133	0.322399	0.426053
A04	APAF1	6.96933	6.73133	0.536136	0.517495
A05	BAD	6.69933	7.038	0.435203	0.409619
A06	BAG1	8.336	8.58133	0.824699	0.583199
A07	BAG3	5.916	5.79467	0.51442	0.446812
A08	BAK1	7.35933	7.448	0.441227	0.49722
A09	BAX	4.01933	4.10133	0.350829	0.407384
A10	BCL10	6.65933	6.39467	0.696707	0.586584
A11	BCL2	9.766	9.76467	0.357363	0.250602
A12	BCL2A1	13.516	13.648	0.609022	0.715589
B01	BCL2L1	4.066	4.538	0.394649	0.37951
B02	BCL2L10	12.3527	12.1113	0.867699	0.270631
B03	BCL2L11	7.17933	6.66133	0.384007	0.357605
B04	BCL2L2	5.87933	6.118	0.329001	0.210114
B05	BFAR	5.57933	5.468	0.281214	0.366644
B06	BID	3.98267	3.83133	0.224235	0.607784
B07	BIK	4.78267	4.84133	0.099203	0.537254
B08	BIRC2	5.68267	5.70467	0.390617	0.259695
B09	BIRC3	8.326	8.41467	0.137579	0.219092
B10	BIRC5	6.836	6.92467	0.712312	0.662602
B11	BIRC6	5.376	5.308	0.854744	0.75524
B12	BNIP2	5.526	5.41467	0.804604	0.692431
C01	BNIP3	6.666	7.10467	0.424297	0.037434
C02	BNIP3L	6.886	6.438	0.142506	0.124772
C03	BRAF	8.91267	8.86133	0.34328	0.383512
C04	CASP1	13.516	13.648	0.609022	0.715589
C05	CASP10	11.4793	13.5913	0.175047	0.669523
C06	CASP14	13.156	13.1913	0.527284	0.624181
C07	CASP2	3.99933	4.15133	0.454842	0.490328
C08	CASP3	5.19267	5.26467	0.360723	0.445535
C09	CASP4	5.33933	5.62133	0.135356	0.345834
C10	CASP5	13.516	13.648	0.609022	0.715589
C11	CASP6	7.17267	7.298	0.349172	0.424509
C12	CASP7	7.64267	7.63467	0.602629	0.433222
D01	CASP8	7.36933	7.37133	0.376007	0.341469
D02	CASP9	6.566	6.348	0.368928	0.334945
D03	CD27	10.2893	9.848	0.809556	0.261052
D04	CD40	12.1993	11.518	0.196167	1.02601
D05	CD40LG	10.906	11.1013	0.725498	0.52532
D06	CD70	13.4493	13.3147	0.651123	0.642963
D07	CFLAR	6.93933	6.83467	0.269075	0.31129
D08	CIDEA	13.036	12.9413	0.726008	0.23495
D09	CIDEB	5.57267	5.908	0.436579	0.714288
D10	CRADD	9.816	10.038	0.281048	0.055749
D11	CYCS	7.286	6.958	0.692321	0.516748
D12	DAPK1	13.516	13.648	0.609022	0.715589
E01	DFFA	4.99933	4.898	0.291618	0.270607
E02	DIABLO	4.97933	5.11133	0.121001	0.155696
E03	FADD	5.28933	5.46467	0.275175	0.090007
E04	FAS	9.016	5.678	0.16908	0.126996
E05	FASLG	8.956	8.30467	0.3104	0.630715
E06	GADD45A	5.90933	5.35467	0.258227	0.269001
E07	HRK	12.1727	12.7447	0.471594	0.340648
E08	IGF1R	5.92267	5.98467	0.296583	0.616215
E09	IL10	9.326	7.248	0.392184	0.721601
E10	LTA	11.1193	11.118	0.305354	0.923032
E11	LTBR	4.54933	4.28467	0.363705	0.409806
E12	MCL1	3.826	3.64133	0.69677	0.503231
F01	NAIP	6.14933	5.49467	0.587198	0.563632
F02	NFKB1	6.70267	6.76133	0.274884	0.409343
F03	NOD1	8.10933	7.74133	0.286394	0.276553
F04	NOL3	5.12933	4.65133	0.186337	0.060343
F05	PYCARD	7.84933	11.198	0.628205	0.462934
F06	RIPK2	5.81267	5.91467	0.314518	0.193394
F07	TNF	13.516	13.648	0.609022	0.715589
F08	TNFRSF10A	6.73933	6.29467	0.361028	0.735446
F09	TNFRSF10B	5.67267	5.52133	0.357996	0.531207
F10	TNFRSF11B	11.076	6.858	0.688511	0.479779
F11	TNFRSF1A	5.486	5.17133	0.378085	0.592774
F12	TNFRSF1B	5.766	5.23467	0.360871	0.866823
G01	TNFRSF21	5.78267	5.33467	0.364309	0.280074
G02	TNFRSF25	9.036	8.23467	0.584421	0.811173
G03	TNFRSF9	13.4993	13.3713	0.584073	0.550001
G04	TNFSF10	6.99933	7.058	0.23414	0.133372
G05	TNFSF8	13.106	13.278	0.665994	0.665769
G06	TP53	3.24267	3.86467	0.497515	0.515171
G07	TP53BP2	5.94933	5.618	0.24536	0.443878
G08	TP73	9.78933	9.13133	0.718193	0.252114
G09	TRADD	8.56933	8.558	0.200852	0.28825
G10	TRAF2	6.00267	6.28467	0.488714	0.898856
G11	TRAF3	5.42933	5.68133	0.176752	0.484233
G12	XIAP	5.53267	5.348	0.381105	0.638583
H01	ACTB	-2.054	-1.84533	0.203539	0.285659
H02	B2M	1.80933	1.39467	0.107058	0.111541
H03	GAPDH	-0.717333	-0.815333	0.286009	0.311001
H04	HPRT1	3.17267	3.19467	0.065432	0.128146
H05	RPLP0	-2.21067	-1.92867	0.337226	0.425724
H06	HGDC	13.256	13.5413	1.02293	0.638719
H07	RTC	1.80933	1.79133	0.938787	0.619097
H08	RTC	1.856	1.92467	0.930757	0.550165
H09	RTC	1.816	1.87467	0.970684	0.615761
H10	PPC	-0.084	0.064667	0.534011	0.583268
H11	PPC	-0.077333	0.111333	0.589034	0.57107
H12	PPC	0.116	0.228	0.450764	0.603712

## Sheet: 2^(-Avg.(Delta(Ct))
Position	Symbol	2^(-Avg.(Delta(Ct))
		Control Group	Group 1
A01	ABL1	0.014552	0.013684
A02	AIFM1	0.042413	0.037647
A03	AKT1	0.058612	0.058261
A04	APAF1	0.00798	0.009412
A05	BAD	0.009623	0.007609
A06	BAG1	0.003095	0.002611
A07	BAG3	0.016562	0.018015
A08	BAK1	0.00609	0.005727
A09	BAX	0.061668	0.058261
A10	BCL10	0.009893	0.011885
A11	BCL2	0.001149	0.00115
A12	BCL2A1	8.5e-05	7.8e-05
B01	BCL2L1	0.059705	0.043045
B02	BCL2L10	0.000191	0.000226
B03	BCL2L11	0.006899	0.00988
B04	BCL2L2	0.016988	0.014398
B05	BFAR	0.020915	0.022593
B06	BID	0.063255	0.070251
B07	BIK	0.036331	0.034883
B08	BIRC2	0.019469	0.019175
B09	BIRC3	0.003116	0.00293
B10	BIRC5	0.008753	0.008231
B11	BIRC6	0.02408	0.025243
B12	BNIP2	0.021702	0.023444
C01	BNIP3	0.009848	0.007266
C02	BNIP3L	0.008455	0.011534
C03	BRAF	0.002075	0.00215
C04	CASP1	8.5e-05	7.8e-05
C05	CASP10	0.00035	8.1e-05
C06	CASP14	0.00011	0.000107
C07	CASP2	0.062529	0.056276
C08	CASP3	0.027343	0.026012
C09	CASP4	0.0247	0.020315
C10	CASP5	8.5e-05	7.8e-05
C11	CASP6	0.006931	0.006355
C12	CASP7	0.005004	0.005032
D01	CASP8	0.006048	0.00604
D02	CASP9	0.010554	0.012276
D03	CD27	0.000799	0.001085
D04	CD40	0.000213	0.000341
D05	CD40LG	0.000521	0.000455
D06	CD70	8.9e-05	9.8e-05
D07	CFLAR	0.008148	0.008761
D08	CIDEA	0.000119	0.000127
D09	CIDEB	0.021012	0.016654
D10	CRADD	0.001109	0.000951
D11	CYCS	0.006408	0.008043
D12	DAPK1	8.5e-05	7.8e-05
E01	DFFA	0.031264	0.033539
E02	DIABLO	0.031701	0.028929
E03	FADD	0.025571	0.022645
E04	FAS	0.001932	0.019532
E05	FASLG	0.002014	0.003163
E06	GADD45A	0.016638	0.024439
E07	HRK	0.000217	0.000146
E08	IGF1R	0.016485	0.015792
E09	IL10	0.001558	0.006579
E10	LTA	0.00045	0.00045
E11	LTBR	0.042708	0.051308
E12	MCL1	0.070511	0.08014
F01	NAIP	0.014089	0.022179
F02	NFKB1	0.009601	0.009218
F03	NOD1	0.003621	0.004673
F04	NOL3	0.02857	0.039793
F05	PYCARD	0.004336	0.000426
F06	RIPK2	0.017792	0.016577
F07	TNF	8.5e-05	7.8e-05
F08	TNFRSF10A	0.00936	0.012738
F09	TNFRSF10B	0.019605	0.021773
F10	TNFRSF11B	0.000463	0.008621
F11	TNFRSF1A	0.022313	0.027751
F12	TNFRSF1B	0.018376	0.026559
G01	TNFRSF21	0.018165	0.02478
G02	TNFRSF25	0.001905	0.00332
G03	TNFRSF9	8.6e-05	9.4e-05
G04	TNFSF10	0.007816	0.007505
G05	TNFSF8	0.000113	0.000101
G06	TP53	0.105648	0.068647
G07	TP53BP2	0.016183	0.020362
G08	TP73	0.00113	0.001783
G09	TRADD	0.002633	0.002653
G10	TRAF2	0.015596	0.012827
G11	TRAF3	0.023206	0.019487
G12	XIAP	0.021602	0.024552
H01	ACTB	4.15256	3.59336
H02	B2M	0.285323	0.380333
H03	GAPDH	1.64414	1.75971
H04	HPRT1	0.1109	0.109222
H05	RPLP0	4.62889	3.80703
H06	HGDC	0.000102	8.4e-05
H07	RTC	0.285323	0.288905
H08	RTC	0.276241	0.263401
H09	RTC	0.284007	0.27269
H10	PPC	1.05995	0.956166
H11	PPC	1.05507	0.925732
H12	PPC	0.922742	0.853818

## Sheet: Fold Change
Position	Symbol	Fold Change (comparing to control group)
		Group 1
		Fold Change	95% CI	Comments
A01	ABL1	0.9404	( 0.46, 1.42 )
A02	AIFM1	0.8876	( 0.57, 1.20 )
A03	AKT1	0.994	( 0.58, 1.41 )
A04	APAF1	1.1794	( 0.49, 1.87 )
A05	BAD	0.7908	( 0.42, 1.16 )
A06	BAG1	0.8436	( 0.18, 1.51 )
A07	BAG3	1.0877	( 0.51, 1.67 )
A08	BAK1	0.9404	( 0.45, 1.43 )
A09	BAX	0.9447	( 0.55, 1.34 )
A10	BCL10	1.2014	( 0.34, 2.06 )
A11	BCL2	1.0009	( 0.66, 1.34 )	B
A12	BCL2A1	0.9126	( 0.24, 1.59 )	C
B01	BCL2L1	0.721	( 0.41, 1.03 )
B02	BCL2L10	1.1821	( 0.34, 2.02 )	B
B03	BCL2L11	1.432	( 0.84, 2.02 )
B04	BCL2L2	0.8475	( 0.59, 1.11 )
B05	BFAR	1.0802	( 0.69, 1.47 )
B06	BID	1.1106	( 0.55, 1.67 )
B07	BIK	0.9602	( 0.55, 1.37 )
B08	BIRC2	0.9849	( 0.62, 1.35 )
B09	BIRC3	0.9404	( 0.75, 1.13 )
B10	BIRC5	0.9404	( 0.22, 1.66 )
B11	BIRC6	1.0483	( 0.11, 1.99 )
B12	BNIP2	1.0802	( 0.18, 1.98 )
C01	BNIP3	0.7378	( 0.49, 0.98 )
C02	BNIP3L	1.3641	( 1.16, 1.57 )
C03	BRAF	1.0362	( 0.62, 1.45 )	B
C04	CASP1	0.9126	( 0.24, 1.59 )	C
C05	CASP10	0.2313	( 0.11, 0.36 )
C06	CASP14	0.9758	( 0.35, 1.60 )	B
C07	CASP2	0.9	( 0.43, 1.37 )
C08	CASP3	0.9513	( 0.52, 1.38 )
C09	CASP4	0.8225	( 0.58, 1.06 )
C10	CASP5	0.9126	( 0.24, 1.59 )	C
C11	CASP6	0.9168	( 0.52, 1.31 )
C12	CASP7	1.0056	( 0.42, 1.59 )
D01	CASP8	0.9986	( 0.60, 1.40 )
D02	CASP9	1.1631	( 0.71, 1.62 )
D03	CD27	1.3579	( 0.45, 2.26 )	B
D04	CD40	1.6036	( 0.29, 2.92 )	B
D05	CD40LG	0.8734	( 0.26, 1.49 )	B
D06	CD70	1.0978	( 0.31, 1.89 )	B
D07	CFLAR	1.0752	( 0.73, 1.42 )
D08	CIDEA	1.0678	( 0.43, 1.71 )	B
D09	CIDEB	0.7926	( 0.27, 1.31 )
D10	CRADD	0.8574	( 0.66, 1.05 )	B
D11	CYCS	1.2553	( 0.40, 2.11 )
D12	DAPK1	0.9126	( 0.24, 1.59 )	C
E01	DFFA	1.0728	( 0.74, 1.41 )
E02	DIABLO	0.9126	( 0.77, 1.05 )
E03	FADD	0.8856	( 0.68, 1.09 )
E04	FAS	10.112	( 8.43, 11.79 )	A
E05	FASLG	1.5706	( 0.70, 2.44 )	A
E06	GADD45A	1.4688	( 1.04, 1.90 )
E07	HRK	0.6727	( 0.37, 0.98 )	B
E08	IGF1R	0.9579	( 0.44, 1.47 )
E09	IL10	4.2222	( 1.50, 6.94 )	A
E10	LTA	1.0009	( 0.24, 1.76 )	B
E11	LTBR	1.2014	( 0.69, 1.72 )
E12	MCL1	1.1366	( 0.37, 1.90 )
F01	NAIP	1.5743	( 0.57, 2.58 )
F02	NFKB1	0.9602	( 0.59, 1.33 )
F03	NOD1	1.2906	( 0.89, 1.69 )
F04	NOL3	1.3928	( 1.18, 1.61 )
F05	PYCARD	0.0982	( 0.04, 0.16 )	A
F06	RIPK2	0.9317	( 0.66, 1.20 )
F07	TNF	0.9126	( 0.24, 1.59 )	C
F08	TNFRSF10A	1.361	( 0.49, 2.24 )
F09	TNFRSF10B	1.1106	( 0.55, 1.67 )
F10	TNFRSF11B	18.6099	( 6.36, 30.86 )	A
F11	TNFRSF1A	1.2437	( 0.56, 1.93 )
F12	TNFRSF1B	1.4453	( 0.38, 2.51 )
G01	TNFRSF21	1.3641	( 0.87, 1.86 )
G02	TNFRSF25	1.7427	( 0.38, 3.11 )	A
G03	TNFRSF9	1.0928	( 0.41, 1.78 )	B
G04	TNFSF10	0.9602	( 0.76, 1.16 )
G05	TNFSF8	0.8876	( 0.23, 1.54 )	B
G06	TP53	0.6498	( 0.28, 1.01 )
G07	TP53BP2	1.2582	( 0.76, 1.76 )
G08	TP73	1.5779	( 0.64, 2.52 )	B
G09	TRADD	1.0079	( 0.73, 1.29 )	A
G10	TRAF2	0.8225	( 0.16, 1.48 )
G11	TRAF3	0.8397	( 0.50, 1.18 )
G12	XIAP	1.1366	( 0.47, 1.80 )
H01	ACTB	0.8653	( 0.63, 1.10 )
H02	B2M	1.333	( 1.17, 1.49 )
H03	GAPDH	1.0703	( 0.72, 1.42 )
H04	HPRT1	0.9849	( 0.87, 1.10 )
H05	RPLP0	0.8225	( 0.47, 1.17 )
H06	HGDC	0.8206	( 0.04, 1.60 )	B
H07	RTC	1.0126	( 0.12, 1.91 )
H08	RTC	0.9535	( 0.14, 1.76 )
H09	RTC	0.9602	( 0.09, 1.83 )
H10	PPC	0.9021	( 0.34, 1.46 )
H11	PPC	0.8774	( 0.31, 1.44 )
H12	PPC	0.9253	( 0.38, 1.47 )
Comments:
A: This gene's average threshold cycle is relatively high (> 30) in either the control or the test sample, and is reasonably low in the other sample (< 30).
These data mean that the gene's expression is relatively low in one sample and reasonably detected in the other sample suggesting that the actual fold-change value is at least as large as the calculated and reported fold-change result.
This fold-change result may also have greater variations if p value > 0.05; therefore, it is important to have a sufficient number of biological replicates to validate the result for this gene.
B: This gene's average threshold cycle is relatively high (> 30), meaning that its relative expression level is low, in both control and test samples, and the p-value for the fold-change is either unavailable or relatively high (p > 0.05).
This fold-change result may also have greater variations; therefore, it is important to have a sufficient number of biological replicates to validate the result for this gene.
C: This gene's average threshold cycle is either not determined or greater than the defined cut-off (deault 35), in both samples meaning that its expression was undetected, making this fold-change result erroneous and un-interpretable.
Fold Change & Fold Regulation:
Fold-Change (2^(- Delta Delta CT)) is the normalized gene expression (2^(- Delta CT)) in the Test Sample divided the normalized gene expression (2^(- Delta CT)) in the Control Sample.
Fold-Regulation represents fold-change results in a biologically meaningful way. Fold-change values greater than one indicate a positive- or an up-regulation, and the fold-regulation is equal to the fold-change.
Fold-change values less than one indicate a negative or down-regulation, and the fold-regulation is the negative inverse of the fold-change.
Fold-change and fold-regulation values greater than 2 are indicated in red; fold-change values less than 0.5 and fold-regulation values less than -2 are indicated in blue.
p-value:
The p values are calculated based on a Student's t-test of the replicate 2^(- Delta CT) values for each gene in the control group and treatment groups, and p values less than 0.05 are indicated in red.

## Sheet: p-value
Position	Symbol	p-value (comparing to control group)
		Group 1
A01	ABL1	0.826425
A02	AIFM1	0.614547
A03	AKT1	0.974699
A04	APAF1	0.617219
A05	BAD	0.395013
A06	BAG1	0.594419
A07	BAG3	0.796454
A08	BAK1	0.858758
A09	BAX	0.81536
A10	BCL10	0.644757
A11	BCL2	0.961023
A12	BCL2A1	0.880794
B01	BCL2L1	0.236326
B02	BCL2L10	0.886788
B03	BCL2L11	0.183935
B04	BCL2L2	0.33488
B05	BFAR	0.664137
B06	BID	0.619881
B07	BIK	0.978986
B08	BIRC2	0.881772
B09	BIRC3	0.610629
B10	BIRC5	0.879169
B11	BIRC6	0.962231
B12	BNIP2	0.90877
C01	BNIP3	0.183036
C02	BNIP3L	0.014185
C03	BRAF	0.848418
C04	CASP1	0.880794
C05	CASP10	0.001802
C06	CASP14	0.964005
C07	CASP2	0.735189
C08	CASP3	0.868637
C09	CASP4	0.288935
C10	CASP5	0.880794
C11	CASP6	0.740058
C12	CASP7	0.937044
D01	CASP8	0.980475
D02	CASP9	0.523263
D03	CD27	0.492033
D04	CD40	0.218754
D05	CD40LG	0.674567
D06	CD70	0.814589
D07	CFLAR	0.664454
D08	CIDEA	0.963726
D09	CIDEB	0.634528
D10	CRADD	0.22928
D11	CYCS	0.614156
D12	DAPK1	0.880794
E01	DFFA	0.68348
E02	DIABLO	0.321121
E03	FADD	0.354743
E04	FAS	5.6e-05
E05	FASLG	0.199099
E06	GADD45A	0.063337
E07	HRK	0.191213
E08	IGF1R	0.983359
E09	IL10	0.066756
E10	LTA	0.765633
E11	LTBR	0.447939
E12	MCL1	0.815898
F01	NAIP	0.265434
F02	NFKB1	0.904478
F03	NOD1	0.17
F04	NOL3	0.010023
F05	PYCARD	0.028971
F06	RIPK2	0.610837
F07	TNF	0.880794
F08	TNFRSF10A	0.308299
F09	TNFRSF10B	0.633939
F10	TNFRSF11B	0.005292
F11	TNFRSF1A	0.413506
F12	TNFRSF1B	0.356507
G01	TNFRSF21	0.150124
G02	TNFRSF25	0.256771
G03	TNFRSF9	0.806621
G04	TNFSF10	0.687772
G05	TNFSF8	0.744485
G06	TP53	0.20519
G07	TP53BP2	0.328115
G08	TP73	0.247293
G09	TRADD	0.922734
G10	TRAF2	0.811677
G11	TRAF3	0.523122
G12	XIAP	0.594752
H01	ACTB	0.373508
H02	B2M	0.010113
H03	GAPDH	0.692761
H04	HPRT1	0.830121
H05	RPLP0	0.448011
H06	HGDC	0.607324
H07	RTC	0.904012
H08	RTC	0.776149
H09	RTC	0.804282
H10	PPC	0.795448
H11	PPC	0.719878
H12	PPC	0.886297
p-value:
The p values are calculated based on a Student's t-test of the replicate 2^(- Delta CT) values for each gene in the control group and treatment groups, and p values less than 0.05 are indicated in red.

## Sheet: Fold Regulation
Position	Symbol	Up-Down Regulation (comparing to control group)
		Group 1
		Fold Regulation	Comments
A01	ABL1	-1.0634
A02	AIFM1	-1.1266
A03	AKT1	-1.006
A04	APAF1	1.1794
A05	BAD	-1.2646
A06	BAG1	-1.1854
A07	BAG3	1.0877
A08	BAK1	-1.0634
A09	BAX	-1.0585
A10	BCL10	1.2014
A11	BCL2	1.0009	B
A12	BCL2A1	-1.0958	C
B01	BCL2L1	-1.387
B02	BCL2L10	1.1821	B
B03	BCL2L11	1.432
B04	BCL2L2	-1.1799
B05	BFAR	1.0802
B06	BID	1.1106
B07	BIK	-1.0415
B08	BIRC2	-1.0154
B09	BIRC3	-1.0634
B10	BIRC5	-1.0634
B11	BIRC6	1.0483
B12	BNIP2	1.0802
C01	BNIP3	-1.3554
C02	BNIP3L	1.3641
C03	BRAF	1.0362	B
C04	CASP1	-1.0958	C
C05	CASP10	-4.3229
C06	CASP14	-1.0248	B
C07	CASP2	-1.1111
C08	CASP3	-1.0512
C09	CASP4	-1.2159
C10	CASP5	-1.0958	C
C11	CASP6	-1.0908
C12	CASP7	1.0056
D01	CASP8	-1.0014
D02	CASP9	1.1631
D03	CD27	1.3579	B
D04	CD40	1.6036	B
D05	CD40LG	-1.145	B
D06	CD70	1.0978	B
D07	CFLAR	1.0752
D08	CIDEA	1.0678	B
D09	CIDEB	-1.2617
D10	CRADD	-1.1663	B
D11	CYCS	1.2553
D12	DAPK1	-1.0958	C
E01	DFFA	1.0728
E02	DIABLO	-1.0958
E03	FADD	-1.1292
E04	FAS	10.112	A
E05	FASLG	1.5706	A
E06	GADD45A	1.4688
E07	HRK	-1.4866	B
E08	IGF1R	-1.0439
E09	IL10	4.2222	A
E10	LTA	1.0009	B
E11	LTBR	1.2014
E12	MCL1	1.1366
F01	NAIP	1.5743
F02	NFKB1	-1.0415
F03	NOD1	1.2906
F04	NOL3	1.3928
F05	PYCARD	-10.1871	A
F06	RIPK2	-1.0733
F07	TNF	-1.0958	C
F08	TNFRSF10A	1.361
F09	TNFRSF10B	1.1106
F10	TNFRSF11B	18.6099	A
F11	TNFRSF1A	1.2437
F12	TNFRSF1B	1.4453
G01	TNFRSF21	1.3641
G02	TNFRSF25	1.7427	A
G03	TNFRSF9	1.0928	B
G04	TNFSF10	-1.0415
G05	TNFSF8	-1.1266	B
G06	TP53	-1.539
G07	TP53BP2	1.2582
G08	TP73	1.5779	B
G09	TRADD	1.0079	A
G10	TRAF2	-1.2159
G11	TRAF3	-1.1909
G12	XIAP	1.1366
H01	ACTB	-1.1556
H02	B2M	1.333
H03	GAPDH	1.0703
H04	HPRT1	-1.0154
H05	RPLP0	-1.2159
H06	HGDC	-1.2187	B
H07	RTC	1.0126
H08	RTC	-1.0487
H09	RTC	-1.0415
H10	PPC	-1.1085
H11	PPC	-1.1397
H12	PPC	-1.0807
Comments:
A: This gene's average threshold cycle is relatively high (> 30) in either the control or the test sample, and is reasonably low in the other sample (< 30).
These data mean that the gene's expression is relatively low in one sample and reasonably detected in the other sample suggesting that the actual fold-change value is at least as large as the calculated and reported fold-change result.
This fold-change result may also have greater variations if p value > 0.05; therefore, it is important to have a sufficient number of biological replicates to validate the result for this gene.
B: This gene's average threshold cycle is relatively high (> 30), meaning that its relative expression level is low, in both control and test samples, and the p-value for the fold-change is either unavailable or relatively high (p > 0.05).
This fold-change result may also have greater variations; therefore, it is important to have a sufficient number of biological replicates to validate the result for this gene.
C: This gene's average threshold cycle is either not determined or greater than the defined cut-off (deault 35), in both samples meaning that its expression was undetected, making this fold-change result erroneous and un-interpretable.
Fold Change & Fold Regulation:
Fold-Change (2^(- Delta Delta CT)) is the normalized gene expression (2^(- Delta CT)) in the Test Sample divided the normalized gene expression (2^(- Delta CT)) in the Control Sample.
Fold-Regulation represents fold-change results in a biologically meaningful way. Fold-change values greater than one indicate a positive- or an up-regulation, and the fold-regulation is equal to the fold-change.
Fold-change values less than one indicate a negative or down-regulation, and the fold-regulation is the negative inverse of the fold-change.
Fold-change and fold-regulation values greater than 2 are indicated in red; fold-change values less than 0.5 and fold-regulation values less than -2 are indicated in blue.
p-value:
The p values are calculated based on a Student's t-test of the replicate 2^(- Delta CT) values for each gene in the control group and treatment groups, and p values less than 0.05 are indicated in red.
