# Supplementary material for: Oxaliplatin resistance in colorectal cancer enhances TRAIL sensitivity via death receptor 4 upregulation and lipid raft localization
Source: eLife. 2021 Aug 3;10:e67750. doi: 10.7554/eLife.67750 (PMC8331188; doi:10.7554/eLife.67750)
Supplement: Figure 2—source data 4. [file elife-67750-fig2-data4.xlsx]

## Sheet: Sheet1
Figure 2 (related to panel C)
CRISPR KO Caspase10
	Casp10	GAPDH -	GAPDH -	CASP10/GAPDH	Percent KO
	Flux	Flux	Norm	Norm
Cas9	0.201	1.07	1	0.201
CRISPRKO	0.0084	0.673	0.628972	0.0133551	93.3557
