# Supplementary material for: Oxaliplatin resistance in colorectal cancer enhances TRAIL sensitivity via death receptor 4 upregulation and lipid raft localization
Source: eLife. 2021 Aug 3;10:e67750. doi: 10.7554/eLife.67750 (PMC8331188; doi:10.7554/eLife.67750)
Supplement: Figure 2—source data 5. [file elife-67750-fig2-data5.xlsx]

## Sheet: Cell viability
Figure 2 (related to panel D)
SW620 Par (Cell Viability)	t1								t2								t3
CAS9 control
0	91.5	92.2	92.5	92.0667				0	82.6	82.4	82.2	82.4				0	83.3	82.6	86.6	84.1667
0.1	92.6	92	90.9	91.8333				0.1	82	83.4	87.1	84.1667				0.1	84.5	84.2	80.9	83.2
1	88.8	87.5	88.7	88.3333				1	78.3	78.6	76.6	77.8333				1	74.8	72.7	71.8	73.1
10	76.8	77.6	76.7	77.0333				10	60.9	60.9	61.6	61.1333				10	54.6	56.8	58	56.4667
50	71.6	69.1	69.2	69.9667				50	57.2	57.6	56	56.9333				50	55.5	55.7	55.5	55.5667
200	66.9	66.1	66.1	66.3667				200	52.1	55.5	54.2	53.9333				200	51.6	52.6	54.1	52.7667
1000	63.4	66	67	65.4667				1000	54.7	52.7	55.1	54.1667				1000	51.5	48	52.5	50.6667
Normalized				Avg	Std							Avg	Std							Avg	Std
0	0.993845	1.00145	1.00471	1	0.00455098			0	1.00243	1	0.997573	1	0.00198179			0	0.989703	0.981386	1.02891	1	0.0207231
0.1	1.00579	0.999276	0.987328	0.997466	0.00764617			0.1	0.995146	1.01214	1.05704	1.02144	0.0261103			0.1	1.00396	1.0004	0.961188	0.988515	0.0193776
1	0.964518	0.950398	0.963432	0.95945	0.00641566			1	0.950243	0.953883	0.929612	0.944579	0.0106876			1	0.888713	0.863762	0.853069	0.868515	0.0149344
10	0.834178	0.842867	0.833092	0.836713	0.00437475			10	0.739078	0.739078	0.747573	0.741909	0.00400465			10	0.648713	0.674851	0.689109	0.670891	0.0167277
50	0.777697	0.750543	0.751629	0.759957	0.0125525			50	0.694175	0.699029	0.679612	0.690939	0.00825084			50	0.659406	0.661782	0.659406	0.660198	0.00112017
200	0.726647	0.717958	0.717958	0.720854	0.0040962			200	0.632282	0.673544	0.657767	0.654531	0.0169999			200	0.613069	0.62495	0.642772	0.626931	0.0122068
1000	0.688631	0.716872	0.727734	0.711079	0.0164805			1000	0.663835	0.639563	0.668689	0.657362	0.0127411			1000	0.611881	0.570297	0.623762	0.60198	0.0229224
CASP 10 KO
0	89.8	87.9	86.8	88.1667				0	86.1	83	81.9	83.6667				0	85.1	80.9	81.9	82.6333
0.1	88.6	90	87.7	88.7667				0.1	83.7	82.4	80.5	82.2				0.1	81.9	80.6	80.7	81.0667
1	86.1	85.6	85.2	85.6333				1	74.6	78.6	76	76.4				1	70.5	70.2	72.5	71.0667
10	72	71.3	71.8	71.7				10	59.5	55.7	56.5	57.2333				10	55.2	58.6	58.7	57.5
50	65	61.4	62.2	62.8667				50	49.8	47.3	52.7	49.9333				50	51.4	49.1	52.7	51.0667
200	61.3	58	58.3	59.2				200	49.8	51.5	48.9	50.0667				200	45.9	42.5	49.7	46.0333
1000	62.7	60.3	60.4	61.1333				1000	51.2	47	48.1	48.7667				1000	44.5	44.5	47.2	45.4
Normalized				Avg	Std							Avg	Std							Avg	Std
0	1.01853	0.996975	0.984499	1	0.0140549			0	1.02908	0.992032	0.978884	1	0.0212541			0	1.02985	0.979024	0.991125	1	0.0216781
0.1	1.00491	1.02079	0.994707	1.00681	0.0107335			0.1	1.0004	0.984861	0.962151	0.98247	0.0157055			0.1	0.991125	0.975393	0.976603	0.981041	0.00714806
1	0.97656	0.970888	0.966352	0.971267	0.00417594			1	0.891633	0.939442	0.908367	0.913147	0.0198085			1	0.853167	0.849536	0.87737	0.860024	0.0123545
10	0.816635	0.808696	0.814367	0.813233	0.00333904			10	0.711155	0.665737	0.675299	0.684064	0.0195503			10	0.668011	0.709157	0.710367	0.695845	0.0196877
50	0.73724	0.696408	0.705482	0.713043	0.017506			50	0.595219	0.565339	0.62988	0.596813	0.0263732			50	0.622025	0.594191	0.637757	0.617991	0.018013
200	0.695274	0.657845	0.661248	0.671456	0.0168994			200	0.595219	0.615538	0.584462	0.598406	0.0128852			200	0.555466	0.51432	0.601452	0.557079	0.0355897
1000	0.711153	0.683932	0.685066	0.693384	0.0125734			1000	0.611952	0.561753	0.5749	0.582869	0.0212541			1000	0.538524	0.538524	0.571198	0.549415	0.0154029

## Sheet: TRAIL Sensitization
Figure 2 (related to panel E)
		SW620										Avg	Dev		CAS9 control									Avg	Dev	% TRAIL Sensitization	SDNUm	TRAIL Sensitization SD
		0	99.9	102.2	97.9	100.6	98.7	100.7	99.2	102.3	98.6	100.011	1.47907		99.3845	100.145	100.471	100.243	100	99.7573	98.9703	98.1386	102.891	100	1.23029	0.0111099	1.92387	1.92366
		0.1	97.1	102.2	101.8	98	99.6	100.2	100.9	107.7	104.1	101.289	3.03038		100.579	99.9276	98.7328	99.5146	101.214	105.704	100.396	100.04	96.1188	100.247	2.37722	1.02828	3.85155	3.80266
		1	99.9	101.1	99.4	95.8	95.4	97.7	103.6	102.8	99.3	99.4444	2.67046		96.4518	95.0398	96.3432	95.0243	95.3883	92.9612	88.8713	86.3762	85.3069	92.4181	4.13808	7.06557	4.92494	4.95609
		10	79.3	82.2	81.2	80.3	80	84	92	93	91.9	84.8778	5.40921		83.4178	84.2867	83.3092	73.9078	73.9078	74.7573	64.8713	67.4851	68.9109	74.9838	6.86966	11.6568	8.74367	10.3282
		50	72	73.3	72.1	74.1	77.2	78.8	86.3	84.5	84.8	78.1222	5.44299		77.7697	75.0543	75.1629	69.4175	69.9029	67.9612	65.9406	66.1782	65.9406	70.3698	4.26105	9.92349	6.91251	8.87529
		200	68	72.1	68.3	63.6	69.9	73.6	82.5	83.6	81.7	73.7	6.83228		72.6647	71.7958	71.7958	63.2282	67.3544	65.7767	61.3069	62.495	64.2772	66.7439	4.12938	9.43845	7.98322	10.8673
		1000	66	67.3	69.9	73.3	71.2	74.6	80.3	81	79.9	73.7222	5.34577		68.8631	71.6872	72.7734	66.3835	63.9563	66.8689	61.1881	57.0297	62.3762	65.6807	4.79969	10.9078	7.18431	9.77715
		SW620													CASP10 KO
		0	99.9	102.2	97.9	100.6	98.7	100.7	99.2	102.3	98.6	100.011	1.47907		101.853	99.6975	98.4499	102.908	99.2032	97.8884	102.985	97.9024	99.1125	100	1.93151	0.0111099	2.43277	2.4325
		0.1	97.1	102.2	101.8	98	99.6	100.2	100.9	107.7	104.1	101.289	3.03038		100.491	102.079	99.4707	100.04	98.4861	96.2151	99.1125	97.5393	97.6603	99.0105	1.66565	2.24936	3.45798	3.41464
		1	99.9	101.1	99.4	95.8	95.4	97.7	103.6	102.8	99.3	99.4444	2.67046		97.656	97.0888	96.6352	89.1633	93.9442	90.8367	85.3167	84.9536	87.737	91.4813	4.74483	8.00766	5.4447	5.47934
		10	79.3	82.2	81.2	80.3	80	84	92	93	91.9	84.8778	5.40921		81.6635	80.8696	81.4367	71.1155	66.5737	67.5299	66.8011	70.9157	71.0367	73.1047	6.05035	13.8706	8.1158	9.60253
		50	72	73.3	72.1	74.1	77.2	78.8	86.3	84.5	84.8	78.1222	5.44299		73.724	69.6408	70.5482	59.5219	56.5339	62.988	62.2025	59.4191	63.7757	64.2616	5.47443	17.7423	7.71982	9.95874
		200	68	72.1	68.3	63.6	69.9	73.6	82.5	83.6	81.7	73.7	6.83228		69.5274	65.7845	66.1248	59.5219	61.5538	58.4462	55.5466	51.432	60.1452	60.898	5.29997	17.3704	8.64695	11.8426
		1000	66	67.3	69.9	73.3	71.2	74.6	80.3	81	79.9	73.7222	5.34577		71.1153	68.3932	68.5066	61.1952	56.1753	57.49	53.8524	53.8524	57.1198	60.8556	6.37713	17.4529	8.32136	11.3582
Table Analyzed	Max CASP10 sens
Column B	CASP10 KO
vs.	vs.
Column A	CAS9 Control
Unpaired t test with Welch's correction
P value	0.0978
P value summary	ns
Significantly different (P < 0.05)?	No
One- or two-tailed P value?	Two-tailed
Welch-corrected t, df	t=1.760, df=15.80
How big is the difference?
Mean of column A	9.92
Mean of column B	17.74
Difference between means (B - A) ± SEM	7.820 ± 4.444
95% confidence interval	-1.611 to 17.25
R squared (eta squared)	0.1639
F test to compare variances
F, DFn, Dfd	1.257, 8, 8
P value	0.7542
P value summary	ns
Significantly different (P < 0.05)?	No
Data analyzed
Sample size, column A	9
Sample size, column B	9
