# Supplementary material for: Oxaliplatin resistance in colorectal cancer enhances TRAIL sensitivity via death receptor 4 upregulation and lipid raft localization
Source: eLife. 2021 Aug 3;10:e67750. doi: 10.7554/eLife.67750 (PMC8331188; doi:10.7554/eLife.67750)
Supplement: Figure 3—figure supplement 1—source data 1. [file elife-67750-fig3-figsupp1-data1.xlsx]

## Sheet: Statistics
Figure 3-figure supplement 1
	Discovery?	P value	Mean of Parental	Mean of OxR	Difference	SE of difference	t ratio	df	q value
HCT116	No	0.053002	368.7	335	33.76	17.31	1.951	148	0.196712
SW620	No	0.940447	246.6	247.6	-1.008	13.47	0.07484	147	0.949851
SW480	No	0.097382	1022	1119	-97.38	58.37	1.668	146	0.196712
HT29	No	0.781913	251.1	254.1	-3.027	10.91	0.2773	148	0.949851

## Sheet: HCT116
HCT116 Par			HCT116 OxR
	Cell area			Cell area
1	408.412		1	206.195
2	294.303		2	179.795
3	336.855		3	221.478
4	434.03		4	212.43
5	219.012		5	205.83
6	307.19		6	286.678
7	324.593		7	259.028
8	253.557		8	217.675
9	398.877		9	422.758
10	238.065		10	330.047
11	196.156		11	435.888
12	169.704		12	337.845
13	156.452		13	252.081
14	156.886		14	469.825
15	227.783		15	469.165
16	261.894		16	381.404
17	311.029		17	214.045
18	217.849		18	326.295
19	241.122		19	291.038
20	211.492		20	473.716
21	370.445		21	379.772
22	374.422		22	462.34
23	280.096		23	427.36
24	334.51		24	370.358
25	407.318		25	475.21
26	442.21		26	319.747
27	380.727		27	362.855
28	418.642		28	287.582
29	383.714		29	251.925
30	607.138		30	252.654
31	255.919		31	305.228
32	463.069		32	551.838
33	400.127		33	511.961
34	436.253		34	457.025
35	455.549		35	267.678
36	413.414		36	198.57
37	303.456		37	270.561
38	458.484		38	301.737
39	251.664		39	437.781
40	253.905		40	378.886
41	402.524		41	353.355
42	282.319		42	247.114
43	263.197		43	304.568
44	260.453		44	381.248
45	489.052		45	238.742
46	524.674		46	359.555
47	299.375		47	287.755
48	337.116		48	237.839
49	583.587		49	337.324
50	296.422		50	252.272
51	614.276		51	406.918
52	485.648		52	276.952
53	464.893		53	276.414
54	590.36		54	522.208
55	601.233		55	340.693
56	437.938		56	265.854
57	306.443		57	261.807
58	519.22		58	436.67
59	441.481		59	335.726
60	328.31		60	390.279
61	480.872		61	278.411
62	226.203		62	250.64
63	515.33		63	349.065
64	327.737		64	282.857
65	331.645		65	346.512
66	418.503		66	347.085
67	239.802		67	471.805
68	403.635		68	481.584
69	204.753		69	314.016
70	299.739		70	367.597
71	569.849		71	372.998
72	604.046		72	305.905
73	489.851		73	291.437
74	523.389		74	394.83
75	438.389		75	288.45
Mean	368.781			334.944
Std	120.102			88.0155
N	75			75
3xSTD	360.305			264.047
plusMean	729.086			598.99
minmean	8.47584			70.897

## Sheet: SW620
SW620 P			SW620 OxR
	Cell area			Cell area
1	228.588		1	580.999
2	168.939		2	222.468
3	236.817		3	175.696
4	97.519		4	451.016
5	122.323		5	312.053
6	236.432		6	196.111
7	320.581		7	197.149
8	208.435		8	163.145
9	263.596		9	150.526
10	295.97		10	167.207
11	223.966		11	157.105
12	217.673		12	189.6
13	152.128		13	183.969
14	156.313		14	222.672
15	331.662		15	149.253
16	278.863		16	319.091
17	245.933		17	146.211
18	258.664		18	154.299
19	386.979		19	156.663
20	382.811		20	193.66
21	342.951		21	298.722
22	414.873		22	151.534
23	309.257		23	271.539
24	462.375		24	147.341
25	351.392		25	157.084
26	254.652		26	452.892
27	282.84		27	297.013
28	120.344		28	342.534
29	182.678		29	435.228
30	171.424		30	305.228
31	170.034		31	294.564
32	177.902		32	278.759
33	158.328		33	400.804
34	240.514		34	366.381
35	184.571		35	302.9
36	210.884		36	221.565
37	416.853		37	309.274
38	178.979		38	316.1
39	218.752		39	203.815
40	251.751		40	174.15
41	319.991		41	250.935
42	301.876		42	383.037
43	252.724		43	215.608
44	288.867		44	196.59
45	320.494		45	316.5
46	224.066		46	201.974
47	307.677		47	226.654
48	335.657		48	226.307
49	266.757		49	317.698
50	188.253		50	253.019
51	221.148		51	187.819
52	259.289		52	227.054
53	271.412		53	179.587
54	174.289		54	236.45
55	203.016		55	219.377
56	229.051		56	251.369
57	209.39		57	212.291
58	215.382		58	196.104
59	216.216		59	192.022
60	204.51		60	191.293
61	226.88		61	364.158
62	137.59		62	219.377
63	187.003		63	131.129
64	275.997		64	148.775
65	256.18		65	151.016
66	170.503		66
67	232.212		67	220.193
68	371.869		68	357.106
69	233.48		69	166.057
70	173.299		70	224.118
71	237.752		71	346.859
72	300.556		72	204.492
73	306.756		73	242.876
74	148.81		74	302.796
75	306.131		75	343.455
Mean	246.542			247.573
Std	74.149			88.5524
N	75			74
3xSTD	222.447			265.657
plusMean	468.989			513.23
minmean	24.0947			-18.0839

## Sheet: SW480
SW480 P			SW480 OxR
	Cell area			Cell area
1	1132.32		1	727.03
2	986.458		2	1199.96
3	977.166		3	736.426
4	1081.55		4	749.939
5	1039.47		5	971.261
6	595.953		6	1762.73
7	723.956		7	1191.66
8	676.645		8	1012.15
9	619.261		9	1521.36
10	595.901		10	1237.69
11	1158.71		11	920.598
12	832.785		12	1886.28
13	1083.72		13	1354.59
14	596.213		14	666.329
15	742.696		15	1071.32
16	699.067		16	960.91
17	906.061		17	1405.5
18	993.596		18	1340.51
19	759.057		19	1027.74
20	1027.34		20	689.584
21	798.778		21	1409.34
22	905.227		22
23	1181.94		23	870.908
24	988.039		24	753.708
25	796.815		25	699.085
26	1897.52		26	437.295
27	1491.71		27	1425.53
28	1013.57		28	1199.86
29	1384.48		29	1503
30	1169		30	1025.5
31	886.869		31	1418.53
32	1302.58		32	1419.39
33	956.133		33	550.535
34	672.72		34	1220.7
35	833.306		35	1575.62
36	1309.24		36	1380.58
37	843.744		37	1519.09
38	1108.66		38
39	1143.9		39	1889.24
40	667.041		40	2284.52
41	1177.77		41	1820.41
42	1352.54		42	488.34
43	1243.66		43	681.421
44	1348.29		44	1244.24
45	1576.4		45	821.964
46	895.918		46	1117.61
47	893.017		47	792.143
48	1351.78		48	930.915
49	1428.65		49	941.266
50	1788.52		50	969.194
51	1258.93		51	1338.81
52	1609.49		52	1498.73
53	1470.19		53	1206.79
54	852.428		54	1071.44
55	1218.51		55	920.859
56	1012.39		56	1505.02
57	1560.21		57	1689.19
58	1296.08		58	1240.38
59	1030.28		59	1915.72
60	836.241		60	548.955
61	1400.27		61	1247.22
62	765.535		62	834.661
63	1439.3		63	678.955
64	637.029		64	1120.23
65	940.276		65	730.087
66	914.988		66	684.93
67	1256.97		67	745.128
68	1220.51		68	929.525
69	463.573		69	857.448
70	830.058		70	1384.85
71	697.73		1	926.017
72	483.095		2	1253.46
73	447.316		3	838.864
74	768.94		4	1068.12
75	567.869		5	622.335
Mean	1021.52			1118.92
Std	318.519			384.468
N	75			73
3xSTD	955.558			1153.4
plusMean	1977.08			2272.32
minmean	65.9612			-34.4838

## Sheet: HT29
HT29 P			HT29 OxR
	Cell area			Cell area
1	392.676		1	195.86
2	316.152		2	158.988
3	369.16		3	220.523
4	266.097		4	381.717
5	226.984		5	233.428
6	155.08		6	219.829
7	213.993		7	207.549
8	254.408		8	212.847
9	281.885		9	251.004
10	296.926		10	275.962
11	276.987		11	241.452
12	239.889		12	207.758
13	201.297		13	182.643
14	279.419		14	255.451
15	166.439		15	313.547
16	258.212		16	272.228
17	233.48		17	232.351
18	193.603		18	281.069
19	197.372		19	237.37
20	211.596		20	248.139
21	343.003		21	273.843
22	212.968		22	321.727
23	216.06		23	275.893
24	237.197		24	305.801
25	266.792		25	233.237
26	322.856		26	436.843
27	183.633		27	254.895
28	104.139		28	262.172
29	169.513		29	246.958
30	144.868		30	378.695
31	163.434		31	372.633
32	109.437		32	364.054
33	169.287		33	179.43
34	150.547		34	182.643
35	114.994		35	309.379
36	187.211		36	281.642
37	341.458		37	255.138
38	260.088		38	380.466
39	202.321		39	320.72
40	255.121		40	338.244
41	235.026		41	260.748
42	240.114		42	320.616
43	288.624		43	305.766
44	182.522		44	258.421
45	244.978		45	288.415
46	337.932		46	222.642
47	169.912		47	174.029
48	255.763		48	223.372
49	315.423		49	200.915
50	306.096		50	193.828
51	252.168		51	310.577
52	343.82		52	259.393
53	369.976		53	203.19
54	287.616		54	428.732
55	341.353		55	301.25
56	324.593		56	231.743
57	189.035		57	217.449
58	239.177		58	182.852
59	240.688		59	152.979
60	224.188		60	212.933
61	313.443		61	232.82
62	424.981		62	258.594
63	317.646		63	249.632
64	243.241		64	283.639
65	222.712		65	207.688
66	303.682		66	192.665
67	247.01		67	183.929
68	388.994		68	353.198
69	237.509		69	167.533
70	266.445		70	177.433
71	277.751		71	260.175
72	235.79		72	206.629
73	260.453		73	159.162
74	277.109		74	133.665
75	240.444		75	234.209
Mean	251.104			254.066
Std	67.7627			64.9546
N	75			75
3xSTD	203.288			194.864
plusMean	454.392			448.93
minmean	47.8158			59.2022
