# Supplementary material for: Oxaliplatin resistance in colorectal cancer enhances TRAIL sensitivity via death receptor 4 upregulation and lipid raft localization
Source: eLife. 2021 Aug 3;10:e67750. doi: 10.7554/eLife.67750 (PMC8331188; doi:10.7554/eLife.67750)
Supplement: Figure 3—figure supplement 2—source data 1. [file elife-67750-fig3-figsupp2-data1.xlsx]

## Sheet: SW480
Figure 3-figure supplement 2
SW480
	Data						CLEANED
	DR4		DR4 Coloc				DR4		DR4 Coloc			Table Analyzed	SW480 Dr4		Table Analyzed	SW480 Dr4 coloc
	Parental	OxR	Parental	OxR			Parental	OxR	Parental	OxR
t1	2.623	53.094	0	53.146		t1	2.623	53.094	0	53.146		Column B	OxR		Column B	OxR
	16.031	61.935	6.86	20.46			16.031	61.935	6.86	20.46		vs.	vs.		vs.	vs.
	0.834	75.864	0.139	67.302			0.834	75.864	0.139			Column A	Parental		Column A	Parental
	12.818	103.844	3.63	109.923			12.818	103.844	3.63
	1.841	25.67	0	4.307			1.841	25.67	0	4.307		Unpaired t test with Welch's correction			Unpaired t test with Welch's correction
2	162.184	3.508	96.532	0.591		2		3.508		0.591		P value	0.8212		P value	0.5986
	78.469	0.816	68.292	0.139			78.469	0.816		0.139		P value summary	ns		P value summary	ns
	85.642	2.449	39.808	0.834			85.642	2.449	39.808	0.834		Significantly different (P < 0.05)?	No		Significantly different (P < 0.05)?	No
		1.476		0.208				1.476		0.208		One- or two-tailed P value?	Two-tailed		One- or two-tailed P value?	Two-tailed
		1.251		0.521				1.251		0.521		Welch-corrected t, df	t=0.2264, df=135.7		Welch-corrected t, df	t=0.5277, df=135.3
3	11.567	34.702	5.488	10.525		3	11.567	34.702	5.488	10.525
	2.31	29.04	0.799	7.573			2.31	29.04	0.799	7.573		How big is the difference?			How big is the difference?
	10.577	7.746	6.096	2.709			10.577	7.746	6.096	2.709		Mean of column A	16.99		Mean of column A	3.957
	18.74	10.126	11.532	1.893			18.74	10.126	11.532	1.893		Mean of column B	16.05		Mean of column B	3.283
	15.579	67.284	10.404	2.049			15.579	67.284	10.404	2.049		Difference between means (B - A) ± SEM	-0.9390 ± 4.148		Difference between means (B - A) ± SEM	-0.6744 ± 1.278
4	13.999	10.855	6.426	0.278		4	13.999	10.855	6.426	0.278		95% confidence interval	-9.142 to 7.264		95% confidence interval	-3.202 to 1.853
	3.908	6.826	0.504	0.799			3.908	6.826	0.504	0.799		R squared (eta squared)	0.0003774		R squared (eta squared)	0.002054
	6.739	6.687	0.591	0.052			6.739	6.687	0.591	0.052
	4.88	11.116	0.313	1.025			4.88	11.116	0.313	1.025		F test to compare variances			F test to compare variances
	9.709	3.404	1.528	0.052			9.709	3.404	1.528	0.052		F, DFn, Dfd	1.326, 70, 67		F, DFn, Dfd	1.028, 66, 70
5	1.285	35.466	0.469	5.731		5	1.285	35.466	0.469	5.731		P value	0.247		P value	0.9079
	1.077	7.746	0.035	0.625			1.077	7.746	0.035	0.625		P value summary	ns		P value summary	ns
	0.921	17.299	0.452	1.355			0.921	17.299	0.452	1.355		Significantly different (P < 0.05)?	No		Significantly different (P < 0.05)?	No
	0.174	17.577	0	1.059			0.174	17.577	0	1.059
	1.424	4.811	0.035	0.087			1.424	4.811	0.035	0.087		Data analyzed			Data analyzed
t2	0.122	57.106	0	5.471		t2	0.122	57.106	0	5.471		Sample size, column A	71		Sample size, column A	71
	4.759	86.459	0.261	1.928			4.759	86.459	0.261	1.928		Sample size, column B	68		Sample size, column B	67
	0.782	30.221	0.017	3.265			0.782	30.221	0.017	3.265
	0.191	47.676	0	0.208			0.191	47.676	0	0.208
	0.278	60.181	0	2.536			0.278	60.181	0	2.536
2	61.587	2.657	1.997	0.139		2	61.587	2.657	1.997	0.139
	5.923	2.762	0.278	0.087			5.923	2.762	0.278	0.087
	5.124	3.335	0.243	1.841			5.124	3.335	0.243	1.841
	3.508	3.734	0.087	0.903			3.508	3.734	0.087	0.903
	8.701	6.496	0.417	0.087			8.701	6.496	0.417	0.087
3	76.646	12.262	14.884	5.106		3	76.646	12.262	14.884	5.106
	78.122	11.949	10.699	3.665			78.122	11.949	10.699	3.665
	45.557	4.134	2.327	1.355			45.557	4.134	2.327	1.355
	47.658		3.699				47.658		3.699
	11.116		0.729				11.116		0.729
4	0.538	307.155	0.052	85.364		4	0.538		0.052
	3.456	209.442	0.625	27.598			3.456		0.625	27.598
	15.805		1.442				15.805		1.442
	11.446		1.841				11.446		1.841
	0.834		0.052				0.834		0.052
5	71.296	10.577	11.706	0.782		5	71.296	10.577	11.706	0.782
	53.841	3.213	41.423	0.208			53.841	3.213	41.423	0.208
	29.144	5.94	4.325	0.608			29.144	5.94	4.325	0.608
	132.988	4.933	13.408	0.035			132.988	4.933	13.408	0.035
	198.796	2.709	12.123	0.156				2.709	12.123	0.156
t3	10.334	9.605	2.466	1.059		t3	10.334	9.605	2.466	1.059
	9.518	5.957	1.824	1.372			9.518	5.957	1.824	1.372
	10.404	3.89	1.216	1.129			10.404	3.89	1.216	1.129
	5.558	7.434	0.087	1.007			5.558	7.434	0.087	1.007
	4.985	5.193	0.417	1.146			4.985	5.193	0.417	1.146
2	63.463	3.491	5.436	1.164		2	63.463	3.491	5.436	1.164
	4.55	7.19	1.719	4.377			4.55	7.19	1.719	4.377
	11.446	4.429	1.216	0.99			11.446	4.429	1.216	0.99
	5.054	2.466	2.223	0.782			5.054	2.466	2.223	0.782
	5.645	1.893	2.345	0.973			5.645	1.893	2.345	0.973
3	11.793	2.24	0.052	0.538		3	11.793	2.24	0.052	0.538
	5.367	7.208	2.9	3.369			5.367	7.208	2.9	3.369
	5.94	4.186	0.625	0.625			5.94	4.186	0.625	0.625
	2.379	6.513	0.399	3.317			2.379	6.513	0.399	3.317
	6.079	7.069	0.608	3.213			6.079	7.069	0.608	3.213
4	24.958	7.52	10.629	5.106		4	24.958	7.52	10.629	5.106
	7.816	4.481	4.029	2.397			7.816	4.481	4.029	2.397
	4.116	16.569	2.588	3.682			4.116	16.569	2.588	3.682
	14.259	7.781	14.607	2.536			14.259	7.781	14.607	2.536
	7.59	3.56	3.89	1.945			7.59	3.56	3.89	1.945
5	2.032	9.049	0.122	4.603		5	2.032	9.049	0.122	4.603
	1.528	0.608	0.122	0.069			1.528	0.608	0.122	0.069
	1.65	0.104	0.452	0.035			1.65	0.104	0.452	0.035
	3.925	0.469	1.581	0.208			3.925	0.469	1.581	0.208
	5.28	5.575	1.65	2.293			5.28	5.575	1.65	2.293
Avg	21.4687	22.9716	6.10645	6.89314			16.9893	16.0502	3.957	3.28255
Std	37.1058	46.8015	14.9235	18.9216			25.9575	22.5367	7.39816	7.49774
N	73	70	73	70			71	68	71	67
SEM	4.34291	5.59385	1.74666	2.26157			3.08059	2.73298	0.878	0.915995
STDx3	111.318	140.404	44.7705	56.7649			77.8724	67.6102	22.1945	22.4932
Plus mean	132.786	163.376	50.8769	63.658			94.8617	83.6604	26.1515	25.7758
Fold Change		1.07		1.12883				0.944728		0.829556
Fold Change STD		2.85875		4.14875				1.9604		2.44863
Fold Change SEM		0.341686		0.49587				0.237733		0.299148

## Sheet: HT29
Figure 3-figure supplement 2
HT29
	Data						CLEANED
	DR4		DR4 Coloc				DR4		DR4 Coloc			Table Analyzed	HT29 Dr4		Table Analyzed	HT29 Dr4 coloc
	Parental	OxR	Parental	OxR			Parental	OxR	Parental	OxR
t1	13.391	24.472	0.556	0.035		t1	13.391	24.472	0.556	0.035		Column B	OxR		Column B	OxR
	8.649	31.992	0.538	0			8.649	31.992	0.538	0		vs.	vs.		vs.	vs.
	11.845	68.448	0.434	1.112			11.845		0.434	1.112		Column A	Parental		Column A	Parental
	16.76	23.395	0.365	0			16.76	23.395	0.365	0
	13.46	34.18	0.382	0			13.46	34.18	0.382	0		Unpaired t test with Welch's correction			Unpaired t test with Welch's correction
2	4.933	6.426	1.824	2.848		2	4.933	6.426	1.824			P value	0.18		P value	0.0659
	5.071	38.158	0.035	1.997			5.071	38.158	0.035	1.997		P value summary	ns		P value summary	ns
	8.615	45.643	0.243	0.591			8.615	45.643	0.243	0.591		Significantly different (P < 0.05)?	No		Significantly different (P < 0.05)?	No
	6.6	35.917	0.139	1.181			6.6	35.917	0.139	1.181		One- or two-tailed P value?	Two-tailed		One- or two-tailed P value?	Two-tailed
	6.635	16.343	0.261	0.591			6.635	16.343	0.261	0.591		Welch-corrected t, df	t=1.350, df=100.4		Welch-corrected t, df	t=1.856, df=118.5
3	10.629	22.162	1.094	0.174		3	10.629	22.162	1.094	0.174
	11.758	39.513	0.261	0.208			11.758	39.513	0.261	0.208		How big is the difference?			How big is the difference?
	13.443	35.153	0.747	0.017			13.443	35.153	0.747	0.017		Mean of column A	8.362		Mean of column A	0.3949
	23.881	25.861	1.876	0.382			23.881	25.861	1.876	0.382		Mean of column B	10.81		Mean of column B	0.2208
	7.486	25.08	0.208	0.521			7.486	25.08	0.208	0.521		Difference between means (B - A) ± SEM	2.451 ± 1.816		Difference between means (B - A) ± SEM	-0.1741 ± 0.09382
4	8.111	22.249	0.417	0.33		4	8.111	22.249	0.417	0.33		95% confidence interval	-1.151 to 6.053		95% confidence interval	-0.3599 to 0.01166
	9.5	20.911	0	0.226			9.5	20.911	0	0.226		R squared (eta squared)	0.01784		R squared (eta squared)	0.02826
	11.255	23.985	0.521	0.486			11.255	23.985	0.521	0.486
	13.443	46.477	0.243	0.556			13.443	46.477	0.243	0.556		F test to compare variances			F test to compare variances
	3.977	48.457	0.052	1.337			3.977	48.457	0.052	1.337		F, DFn, Dfd	5.084, 73, 74		F, DFn, Dfd	2.589, 71, 72
5	10.803	12.175	1.893	0.677		5	10.803	12.175	1.893	0.677		P value	<0.0001		P value	<0.0001
	12.557	43.281	1.025	1.372			12.557	43.281	1.025	1.372		P value summary	****		P value summary	****
	16.187	19.053	0.33	0			16.187	19.053	0.33	0		Significantly different (P < 0.05)?	Yes		Significantly different (P < 0.05)?	Yes
	10.734	26.886	0.66	0.834			10.734	26.886	0.66	0.834
	6.808	24.628	0.052	0.782			6.808	24.628	0.052	0.782		Data analyzed			Data analyzed
t2	0.782	1.129	0.052	0.278		t2	0.782	1.129	0.052	0.278		Sample size, column A	75		Sample size, column A	72
	8.389	0.382	0	0.052			8.389	0.382	0	0.052		Sample size, column B	74		Sample size, column B	73
	1.963	0.139	0.365	0.035			1.963	0.139	0.365	0.035
	13.582	0.365	5.888	0			13.582	0.365		0
	12.019	0.816	0.017	0.052			12.019	0.816	0.017	0.052
2	0.139	0.33	0.017	0		2	0.139	0.33	0.017	0
	0.365	1.285	0	0			0.365	1.285	0	0
	0.903	0.434	0	0			0.903	0.434	0	0
	0.278	0.973	0	0			0.278	0.973	0	0
	0.035	1.32	0	0			0.035	1.32	0	0
3	0.886	1.181	0	0		3	0.886	1.181	0	0
	0	0.122	0	0			0	0.122	0	0
	0.104	0.556	0	0			0.104	0.556	0	0
	0.191	0.643	0	0			0.191	0.643	0	0
	0.035	0.452	0	0			0.035	0.452	0	0
4	10.456	0.625	0	0		4	10.456	0.625	0	0
	20.998	0.591	8.094	0			20.998	0.591		0
	19.035	0.226	0.452	0			19.035	0.226	0.452	0
	1.581	0.191	0.035	0			1.581	0.191	0.035	0
	4.064	0.226	0.625	0			4.064	0.226	0.625	0
5	14.954	1.181				5	14.954	1.181
	0.087	3.977	0	0			0.087	3.977	0	0
	15.353	0.66	0	0			15.353	0.66	0	0
	20.929	0.66	0.017	0			20.929	0.66	0.017	0
	24.402	0.643	0	0			24.402	0.643	0	0
t3	1.337	1.719	0	0		t3	1.337	1.719	0	0
	6.999	1.667	2.067	0			6.999	1.667	2.067	0
	23.482	2.31	0.417	0.017			23.482	2.31	0.417	0.017
	10.525	0.99	3.821	0			10.525	0.99	3.821	0
	5.349	0.938	0.139	0			5.349	0.938	0.139	0
2	6.565	19.904	0.174	1.059		2	6.565	19.904	0.174	1.059
	4.134	1.772	0.208	0			4.134	1.772	0.208	0
	5.992	11.289	0	0			5.992	11.289	0	0
	7.746	4.637	0.035	0			7.746	4.637	0.035	0
	6.583	6.704	0.174	0			6.583	6.704	0.174	0
3	6.756	2.032	0.035	0		3	6.756	2.032	0.035	0
	2.171	5.193	0	0			2.171	5.193	0	0
	1.511	0.469	0	0			1.511	0.469	0	0
	11.793	1.181	0.035	0.017			11.793	1.181	0.035	0.017
	5.471	1.806	0.035	0			5.471	1.806	0.035	0
4	15.058	5.367	2.31	1.077		4	15.058	5.367	2.31	1.077
	8.059	4.985	1.459	0.035			8.059	4.985	1.459	0.035
	6.513	1.129	0.017	0			6.513	1.129	0.017	0
	4.012	5.158	0.278	2.24			4.012	5.158	0.278
	6.322	0.938	0.017	0			6.322	0.938	0.017	0
5	15.197	0.903	0.261	0		5	15.197	0.903	0.261	0
	4.481	2.206	0.764	0			4.481	2.206	0.764	0
	2.588	0.66	0.017	0			2.588	0.66	0.017	0
	4.55	3.647	0.174	0.069			4.55	3.647	0.174	0.069
	15.874	1.042	0.261	0.017			15.874	1.042	0.261	0.017
Avg	8.36172	11.5813	0.573189	0.286554			8.36172	10.8128	0.394917	0.223847
Std	6.2963	15.5737	1.27175	0.562036			6.2963	14.196	0.672746	0.420241
N	75	75	74	74			75	74	72	72
SEM	0.727035	1.7983	0.147838	0.0653354			0.727035	1.65026	0.0792838	0.0495259
STDx3	18.8889	46.7211	3.81526	1.68611			18.8889	42.5881	2.01824	1.26072
Plus mean	27.2506	58.3025	4.38845	1.97266			27.2506	53.4009	2.41315	1.48457
Fold Change		1.38504		0.499929				1.29314		0.566821
Fold Change STD		2.13462		1.48048				1.95715		1.43691
Fold Change SEM		0.246485		0.172102				0.227515		0.169342
