# Supplementary material for: Oxaliplatin resistance in colorectal cancer enhances TRAIL sensitivity via death receptor 4 upregulation and lipid raft localization
Source: eLife. 2021 Aug 3;10:e67750. doi: 10.7554/eLife.67750 (PMC8331188; doi:10.7554/eLife.67750)
Supplement: Figure 3—figure supplement 3—source data 1. [file elife-67750-fig3-figsupp3-data1.xlsx]

## Sheet: Statistics
Figure 3-figure supplement 3
Table Analyzed	HCT116 Int Density		Table Analyzed	SW620 Int Density		Table Analyzed	SW480 Int Density		Table Analyzed	HT29 Int Density
Column B	OxR		Column B	OxR		Column B	OxR		Column B	OxR
vs.	vs.		vs.	vs.		vs.	vs.		vs.	vs.
Column A	Parental		Column A	Parental		Column A	Parental		Column A	Parental
Unpaired t test with Welch's correction			Unpaired t test with Welch's correction			Unpaired t test with Welch's correction			Unpaired t test with Welch's correction
P value	<0.0001		P value	<0.0001		P value	0.8657		P value	0.6684
P value summary	****		P value summary	****		P value summary	ns		P value summary	ns
Significantly different (P < 0.05)?	Yes		Significantly different (P < 0.05)?	Yes		Significantly different (P < 0.05)?	No		Significantly different (P < 0.05)?	No
One- or two-tailed P value?	Two-tailed		One- or two-tailed P value?	Two-tailed		One- or two-tailed P value?	Two-tailed		One- or two-tailed P value?	Two-tailed
Welch-corrected t, df	t=6.252, df=105.4		Welch-corrected t, df	t=10.50, df=112.8		Welch-corrected t, df	t=0.1694, df=144.5		Welch-corrected t, df	t=0.4293, df=125.1
How big is the difference?			How big is the difference?			How big is the difference?			How big is the difference?
Mean of column A	4489		Mean of column A	1569		Mean of column A	8540		Mean of column A	2805
Mean of column B	7227		Mean of column B	4452		Mean of column B	8672		Mean of column B	2910
Difference between means (B - A) ± SEM	2738 ± 438.0		Difference between means (B - A) ± SEM	2883 ± 274.6		Difference between means (B - A) ± SEM	132.0 ± 779.1		Difference between means (B - A) ± SEM	105.1 ± 244.9
95% confidence interval	1870 to 3606		95% confidence interval	2339 to 3427		95% confidence interval	-1408 to 1672		95% confidence interval	-379.5 to 589.7
R squared (eta squared)	0.2705		R squared (eta squared)	0.4941		R squared (eta squared)	0.0001986		R squared (eta squared)	0.001471
F test to compare variances			F test to compare variances			F test to compare variances			F test to compare variances
F, DFn, Dfd	4.225, 73, 74		F, DFn, Dfd	3.527, 74, 74		F, DFn, Dfd	1.089, 72, 73		F, DFn, Dfd	2.368, 73, 74
P value	<0.0001		P value	<0.0001		P value	0.717		P value	0.0003
P value summary	****		P value summary	****		P value summary	ns		P value summary	***
Significantly different (P < 0.05)?	Yes		Significantly different (P < 0.05)?	Yes		Significantly different (P < 0.05)?	No		Significantly different (P < 0.05)?	Yes
Data analyzed			Data analyzed			Data analyzed			Data analyzed
Sample size, column A	75		Sample size, column A	75		Sample size, column A	74		Sample size, column A	75
Sample size, column B	74		Sample size, column B	75		Sample size, column B	73		Sample size, column B	74

## Sheet: HCT116
HCT116 Par			HCT116 OxR
	IntDen			IntDen
1	5635.61		1	4168.18
2	4899.83		2	3467.88
3	4536.35		3	3609.26
4	8236.47		4	3998.16
5	5872.17		5	2518.01
6	4866.36		6	4472.4
7	7370.34		7	3548.47
8	4615.63		8	2400.19
9	7292.29		9	7126.89
10	2928.77		10	4319.89
11	7378.52		11	5604.14
12	5975.33		12	7249.58
13	4086.13		13	6049.69
14	5050.59		14	7440.58
15	7012.78		15	7686.36
16	3679.07		16	6451.36
17	6286.38		17	5715.63
18	4016.35		18	5942.87
19	5311.49		19	5708.12
20	4512.95		20	6806.64
21	5898.1		21	5831.89
22	6680.86		22	5232.69
23	7155.01		23	7283.88
24	6848.5		24	9563.38
25	6099.45		25	10348.2
26	3779.13		26	9614.25
27	2891.12		27	9737.38
28	3065.28		28	9660.31
29	2622.66		29	4007.25
30	4017.15		30	3972.77
31	3225.59		31	10270.6
32	3193.97		32	17966.4
33	2913.8		33	23962
34	2683.19		34	13123.2
35	3920.34		35	6153.55
36	3277.44		36	9740.78
37	2370.37		37	9834.08
38	3334.28		38	10781.8
39	2282.07		39	10168.8
40	2185.49		40	9571.75
41	3133.66		41	5706.72
42	2107		42	4562.3
43	2045.88		43	4705.95
44	2044.53		44	6756.4
45	3175.24		45	4710.69
46	3463		46	7768.11
47	2022.24		47	5979.07
48	3354.12		48	8706.73
49	3377.11		49	7826.4
50	2451.72		50	3613.67
51	5253.55		51	6771.4
52	5595.65		52	4791.44
53	5212.65		53	4628.69
54	4601.05		54	6896.37
55	4728.3		55	4280.26
56	8821.19		56	5337.33
57	3575.84		57	4332.46
58	4509.15		58	6050.36
59	4565.06		59	5173.36
60	3866.89		60	5933.53
61	5832.64		61	8796.81
62	3713.78		62	8030.44
63	4628.02		63	13571.9
64	4012.18		64	8161.98
65	2853.74		65	8030.49
66	6102.56		66	5425.67
67	3104.55		67	10621
68	5996.8		68	6456.62
69	3456.85		69	6453.37
70	3299.68		70	8162.16
71	7419.27		71
72	6598.88		72	10944.8
73	5026.51		73	10362.7
74	4098.91		74	6935.31
75	4597.76		75	7192.3
Mean	4488.71			7226.84
Std	1639.21			3369.14
N	75			74
3xSTD	4917.62			10107.4
plusMean	9406.33			17334.2
minmean	-428.911			-2880.57

## Sheet: SW620
SW620 P			SW620 OxR
	IntDen			IntDen
1	375.165		1	7424.58
2	224.883		2	3272.92
3	137.988		3	1935.89
4	144.664		4	4471.76
5	149.013		5	3873.46
6	261.738		6	7344.86
7	327.876		7	3801.19
8	272.402		8	2943.47
9	227.071		9	2150.62
10	341.805		10	5350.69
11	217.866		11	4145.07
12	260.329		12	5263.33
13	54.449		13	3629.8
14	39.999		14	3325.48
15	199.23		15	2770.6
16	110.392		16	5912.52
17	138.771		17	3157.68
18	50.645		18	4887.41
19	88.769		19	1505.7
20	156.956		20	1893.82
21	109.68		21	4022.52
22	84.079		22	878.221
23	58.652		23	3671.66
24	165.727		24	2213.55
25	220.506		25	1037.93
26	2213.31		26	7973.3
27	1785.39		27	5615.47
28	1425.33		28	7690.32
29	3397.89		29	7581.54
30	1449.39		30	4416.44
31	1436.87		31	3535.98
32	1299.76		32	3818.97
33	1849.45		33	5243.98
34	1988.27		34	4746.1
35	1095.06		35	9167.55
36	2374.99		36	7523.76
37	3923.43		37	9606.42
38	1693.64		38	10284.9
39	3392.05		39	5287.36
40	2046.63		40	4311.47
41	3074.16		41	7327.58
42	2738.64		42	7161.33
43	1899.24		43	5084.7
44	2584.53		44	3029.54
45	2309.01		45	5949.44
46	2380.46		46	4189.19
47	2359.72		47	4998.69
48	3234.85		48	4386.43
49	2122.13		49	8054
50	2203.6		50	4206.82
51	1842.34		51	2557.51
52	1958.34		52	4154.68
53	2550.84		53	3124.91
54	2160.47		54	4357.56
55	2388.26		55	3306.72
56	1988.43		56	3785
57	1473.86		57	2845.44
58	1897.23		58	3554.13
59	2205.89		59	3748.74
60	1939.38		60	2913.24
61	2178.9		61	4800.92
62	1597.66		62	4758.1
63	1963.24		63	2022.99
64	1854.99		64	2179.35
65	2298.27		65	2271.34
66	1918.76		66	10161.3
67	2433.38		67	3375.58
68	3344.25		68	3331.38
69	2412.97		69	2204.9
70	2035.34		70	3174.18
71	3089.27		71	4104
72	3066.26		72	2985.83
73	3082.38		73	3504.39
74	1907.44		74	4257.89
75	3420.32		75	4341.9
Mean	1569.4			4451.97
Std	1110.31			2085.17
N	75			75
3xSTD	3330.94			6255.51
plusMean	4900.34			10707.5
minmean	-1761.54			-1803.54

## Sheet: SW480
SW480 P			SW480 OxR
	IntDen			IntDen
1	11404.5		1	20184.8
2	10527.4		2	16865.9
3	5925.89		3	15021.9
4	7577.32		4	12820.3
5	8036.41		5	13581
6	14119.2		6	12645.1
7	15234.4		7	6696.82
8	16671		8	5556.33
9	14619.3		9	8964.11
10	5175.7		10	7114.41
11	10414.6		11	6853.33
12	6900.2		12	14860.6
13	10706.8		13	6774.16
14	6986.52		14	6696.84
15	6484.05		15	8912.42
16	3674.77		16	4559.07
17	5276.23		17	7467.52
18	5853.76		18	8228.61
19	5346.68		19	6219.15
20	8069.48		20	3413.69
21	3964.62		21	10315.2
22	4770		22	23207.1
23	6977.51		23	7904.48
24	6660.92		24	7566.13
25	4210.96		25	5877.45
26	11426.4		26	3566.46
27	5845.72		27	21383.5
28	4349.9		28	16246.7
29	5612.67		29	19022.9
30	7933.12		30	14348.9
31	5375.19		31	10537.9
32	7299.72		32	11928
33	5693.22		33	3914.5
34	4228.19		34	8401.21
35	9450.28		35	11670.9
36	17471.8		36	14653.8
37	12585.9		37	18035.2
38	19152.1		38
39	13348.5		39
40	6013.84		40	16276.9
41	12989.9		41	15114.3
42	13284.9		42	6683.74
43	15073.3		43	5646.29
44	13463		44	10445.1
45	16062.7		45	6864.01
46	14175.1		46	7728.39
47	20097.4		47	4939.45
48	23295.3		48	4404.56
49	12885.9		49	5730.89
50			50	5648.66
51	7256.39		51	7055.42
52	8616.72		52	6715.58
53	7763.77		53	5498.21
54	4593.99		54	4724.59
55	6562.93		55	3890.91
56	14286.1		56	6105.32
57	9701.39		57	8318.97
58	7460.53		58	7153.99
59	6377.48		59	8818.01
60	5186.18		60	3699.05
61	7858.44		61	10443.4
62	5119.78		62	6432.19
63	6463.36		63	3940.12
64	3703.43		64	6008.02
65	4406.84		65	4784.04
66	4665.12		66	4611.27
67	7232.94		67	5961.79
68	7710.93		68	4214.26
69	2593.95		69	3677.53
70	3927.41		70	7524.76
71	3759.07		1	4712.31
72	3729.91		2	6953.23
73	2599.51		3	3438.72
74	4790.03		4	3786.45
75	2871.74		5	3071.76
Mean	8539.73			8671.77
Std	4589.51			4789
N	74			73
3xSTD	13768.5			14367
plusMean	22308.3			23038.8
minmean	-5228.8			-5695.24

## Sheet: HT29
HT29 P			HT29 OxR
	IntDen			IntDen
1	4408.14		1	3386.18
2	2815.9		2	3209.55
3	4039.71		3	3985.52
4	3459.99		4
5	2849.89		5	3474.84
6	1643.22		6	4022.24
7	2239.72		7	7856.16
8	2745.03		8	7129.83
9	2772.46		9	5288.06
10	3323.15		10	7241.02
11	3217.01		11	3550.91
12	3871.95		12	3797.16
13	2157.35		13	3418.61
14	2417.68		14	3586.17
15	2155.94		15	6004.32
16	2971.43		16	4385.04
17	3029.72		17	2954.08
18	2374.29		18	5319.6
19	1936.89		19	6407.26
20	2141.34		20	6448.69
21	3394.91		21	5666.74
22	2862.2		22	3588.93
23	2690.88		23	3254.68
24	3232.99		24	6802.58
25	2659.15		25	7171.95
26	3771.02		26	2681.29
27	1645.27		27	1765.3
28	908.857		28	1498.51
29	2035.04		29	1555.66
30	1364.89		30	2043.81
31	1247.36		31	2004.18
32	857.847		32	1852.28
33	970.219		33	869.518
34	872.679		34	1015.2
35	729.097		35	1667.31
36	943.976		36	1649.97
37	2339.31		37	1552.33
38	1702.49		38	2200.39
39	1096.76		39	1616.59
40	1624.3		40	1745.9
41	2954.95		41	1671.7
42	3876.99		42	1733.7
43	3269.47		43	1404.49
44	1955.2		44	1222.14
45	2176.07		45	1352.63
46	7133.37		46	1093.1
47	1663.76		47	1171.08
48	4731.25		48	1000.16
49	5102.53		49	1076.96
50	4689.73		50	958.495
51	2921.23		51	2565.38
52	4875.76		52	2101.8
53	4425.97		53	1482.23
54	3248.57		54	3201.52
55	2890.39		55	2778.43
56	3395.92		56	3876.91
57	2339.89		57	2260.18
58	2505.53		58	1678.11
59	2356.8		59	1431.46
60	2797.47		60	2959.04
61	2417.99		61	2055.74
62	4613.85		62	2408.74
63	3144.47		63	2024.86
64	3495.65		64	2987.18
65	2955.08		65	1728.18
66	3907.29		66	2385.15
67	2889.64		67	2488.45
68	4298.32		68	3511.33
69	2870.73		69	1640.91
70	2121.08		70	2159.9
71	2849.31		71	4141.92
72	3597.32		72	2151.41
73	2933.41		73	1819.3
74	2653.95		74	1114.65
75	2769.56		75	2015.09
Mean	2804.65			2909.74
Std	1142.35			1757.65
N	75			74
3xSTD	3427.06			5272.95
plusMean	6231.71			8182.69
minmean	-622.414			-2363.22
