# Supplementary material for: Oxaliplatin resistance in colorectal cancer enhances TRAIL sensitivity via death receptor 4 upregulation and lipid raft localization
Source: eLife. 2021 Aug 3;10:e67750. doi: 10.7554/eLife.67750 (PMC8331188; doi:10.7554/eLife.67750)
Supplement: Figure 3—figure supplement 4—source data 1. [file elife-67750-fig3-figsupp4-data1.xlsx]

## Sheet: Statistics
Figure 3-figure supplement 4
Table Analyzed	HCT116 Dr5		Table Analyzed	Sw620 Dr5		Table Analyzed	SW480 Dr5		Table Analyzed	HT29 Dr5
Column B	OxR		Column B	OxR		Column B	OxR		Column B	OxR
vs.	vs.		vs.	vs.		vs.	vs.		vs.	vs.
Column A	Parental		Column A	Parental		Column A	Parental		Column A	Parental
Unpaired t test with Welch's correction			Unpaired t test with Welch's correction			Unpaired t test with Welch's correction			Unpaired t test with Welch's correction
P value	0.0012		P value	0.001		P value	<0.0001		P value	<0.0001
P value summary	**		P value summary	**		P value summary	****		P value summary	****
Significantly different (P < 0.05)?	Yes		Significantly different (P < 0.05)?	Yes		Significantly different (P < 0.05)?	Yes		Significantly different (P < 0.05)?	Yes
One- or two-tailed P value?	Two-tailed		One- or two-tailed P value?	Two-tailed		One- or two-tailed P value?	Two-tailed		One- or two-tailed P value?	Two-tailed
Welch-corrected t, df	t=3.351, df=86.96		Welch-corrected t, df	t=3.390, df=93.42		Welch-corrected t, df	t=4.389, df=107.5		Welch-corrected t, df	t=4.477, df=89.32
How big is the difference?			How big is the difference?			How big is the difference?			How big is the difference?
Mean of column A	0.1275		Mean of column A	1.233		Mean of column A	27.86		Mean of column A	1.067
Mean of column B	0.4452		Mean of column B	2.489		Mean of column B	10.5		Mean of column B	3.165
Difference between means (B - A) ± SEM	0.3177 ± 0.09481		Difference between means (B - A) ± SEM	1.256 ± 0.3706		Difference between means (B - A) ± SEM	-17.36 ± 3.956		Difference between means (B - A) ± SEM	2.098 ± 0.4686
95% confidence interval	0.1293 to 0.5061		95% confidence interval	0.5203 to 1.992		95% confidence interval	-25.21 to -9.523		95% confidence interval	1.167 to 3.029
R squared (eta squared)	0.1144		R squared (eta squared)	0.1095		R squared (eta squared)	0.152		R squared (eta squared)	0.1833
F test to compare variances			F test to compare variances			F test to compare variances			F test to compare variances
F, DFn, Dfd	10.49, 73, 72		F, DFn, Dfd	5.735, 70, 71		F, DFn, Dfd	4.317, 74, 71		F, DFn, Dfd	9.801, 74, 72
P value	<0.0001		P value	<0.0001		P value	<0.0001		P value	<0.0001
P value summary	****		P value summary	****		P value summary	****		P value summary	****
Significantly different (P < 0.05)?	Yes		Significantly different (P < 0.05)?	Yes		Significantly different (P < 0.05)?	Yes		Significantly different (P < 0.05)?	Yes
Data analyzed			Data analyzed			Data analyzed			Data analyzed
Sample size, column A	73		Sample size, column A	72		Sample size, column A	75		Sample size, column A	73
Sample size, column B	74		Sample size, column B	71		Sample size, column B	72		Sample size, column B	75

## Sheet: HCT116
HCT116	Data				CLEANED
	DR5				DR5
	Parental	OxR			Parental	OxR
t1	0	0		t1	0	0
	0	0.017			0	0.017
	0.017	0.243			0.017	0.243
	0	0			0	0
	0	0.017			0	0.017
2	0.035	0		2	0.035	0
	0	0			0	0
	0.017	0			0.017	0
	0.122	0			0.122	0
	0.087	0			0.087	0
3	0.382	0		3	0.382	0
	0.33	0			0.33	0
	0.33	0			0.33	0
	0.069	0			0.069	0
	0.174	0			0.174	0
4	0.139	0.868		4	0.139	0.868
	1.025	1.042			1.025	1.042
	0.017	1.251			0.017	1.251
	0.261	1.389			0.261	1.389
	0.087	0.035			0.087	0.035
5	0.243	0.261		5	0.243	0.261
	0.243	0.313			0.243	0.313
	0.139	0			0.139	0
	0.295	1.91			0.295	1.91
	0.313	0.139			0.313	0.139
t2	0	0		t2	0	0
	0	0			0	0
	0.035	0			0.035	0
	0	0			0	0
	0.069	0			0.069	0
2	0.035	0.017		2	0.035	0.017
	0	0			0	0
	0	0			0	0
	0.156	0			0.156	0
	0.087	0			0.087	0
3	0	0		3	0	0
	0	0			0	0
	0.035	0			0.035	0
	0.035	0			0.035	0
	0.017	0			0.017	0
4	0	0		4	0	0
	0	0			0	0
	0	0			0	0
	0	0			0	0
	0	0			0	0
5	0	0.017		5	0	0.017
	0.174	0			0.174	0
	0	0			0	0
	0	0			0	0
	0.122	0			0.122	0
t3	0.069	0.035		t3	0.069	0.035
	2.327	0.347				0.347
	0	0.087			0	0.087
	1.129	0.226			1.129	0.226
	0.069	0.747			0.069	0.747
2	0.156	0.174		2	0.156	0.174
	0.069	2.744			0.069	2.744
	0.104	3.178			0.104
	0.104	2.57			0.104	2.57
	0.035	2.397			0.035	2.397
3	0	2.032		3	0	2.032
	0.104	3.3			0.104	3.3
	0.104	0.122			0.104	0.122
	0	1.876			0	1.876
	0	1.615			0	1.615
4	0.069	0.729		4	0.069	0.729
	1.581	1.025				1.025
	1.251	0.365			1.251	0.365
	0.035	1.112			0.035	1.112
	0	0.261			0	0.261
5	0.556	0.087		5	0.556	0.087
	0	1.32			0	1.32
	0.365	0.486			0.365	0.486
	0	1.702			0	1.702
	0	0.069			0	0.069
Avg	0.176227	0.481667			0.127521	0.44523
Std	0.381834	0.829825			0.238786	0.773525
N	75	75			73	74
SEM	0.0440903	0.09582			0.0279478	0.0899205
STDx3	1.1455	2.48948			0.716359	2.32058
Plus mean	1.32173	2.97114			0.843879	2.76581
Fold Change		2.73322				3.49144
Fold Change STD		7.56603				8.91842
Fold Change SEM		0.87365				1.03674

## Sheet: SW620
SW620	Data				CLEANED
	DR5				DR5
	Parental	OxR			Parental	OxR
t1	0.434	2.992		t1	0.434	2.992
	0.156	1.628			0.156	1.628
	0.208	0.678			0.208	0.678
	0.382	5.855			0.382	5.855
	0.747	0.665			0.747	0.665
2	0.938	0.851		2	0.938	0.851
	0.035	0.955			0.035	0.955
	0	1.007			0	1.007
	0.226	1.928			0.226	1.928
	0	1.077			0	1.077
3	0.069	0.799		3	0.069	0.799
	0.017	0.469			0.017	0.469
	0.017	0.886			0.017	0.886
	0	0.156			0	0.156
	0.069	1.303			0.069	1.303
4	0.316	0.532		4	0.316	0.532
	0.284	4.46			0.284	4.46
5	0.027	1.66		5	0.027	1.66
	0.009	0.548			0.009	0.548
	0.222	0.799			0.222	0.799
	0.124	1.03			0.124	1.03
	0.018	0.707			0.018	0.707
t2	0.434	11.48		t2	0.434	11.48
	0.469	3.647			0.469	3.647
	1.581	1.059			1.581	1.059
	2.414	0.556			2.414	0.556
	5.87	0.677			5.87	0.677
2	1.91	11.758		2	1.91	11.758
	1.268	0.834			1.268	0.834
	2.432	1.65			2.432	1.65
	1.667	0.782			1.667	0.782
	1.789	12.401			1.789	12.401
3	0.261	4.168		3	0.261	4.168
	1.407	2.466			1.407	2.466
	3.369	2.657			3.369	2.657
	1.685	0.747			1.685	0.747
	0.66	2.762			0.66	2.762
4	1.685	6.235		4	1.685	6.235
	0.087	8.25			0.087	8.25
	1.233	4.672			1.233	4.672
	0.591	1.928			0.591	1.928
	4.759	5.176			4.759	5.176
5	0.399	0.469		5	0.399	0.469
	0.591	1.059			0.591	1.059
	1.042	1.112			1.042	1.112
	0.66	0.625			0.66	0.625
	0.313	0.834			0.313	0.834
t3	2.588	3.057		t3	2.588	3.057
	1.181	24.142			1.181
	3.665	0.834			3.665	0.834
	2.623	7.798			2.623	7.798
	3.022	6.131			3.022	6.131
2	1.077	0.764		2	1.077	0.764
	2.275	0.156			2.275	0.156
	0.747	3.057			0.747	3.057
	2.154	0.226			2.154	0.226
	3.074	0.747			3.074	0.747
3	1.094	0.226		3	1.094	0.226
	1.112	0.399			1.112	0.399
	1.303	1.077			1.303	1.077
	1.355	1.32			1.355	1.32
	0.903	0.399			0.903	0.399
4	1.285	2.154		4	1.285	2.154
	2.709	3.89			2.709	3.89
	2.623	4.064			2.623	4.064
	0.469	3.96			0.469	3.96
	3.265	0.434			3.265	0.434
5	1.355	2.188		5	1.355	2.188
	1.91	3.595			1.91	3.595
	1.997	10.056			1.997	10.056
	1.181	0.104			1.181	0.104
	0.903	1.077			0.903	1.077
Avg	1.23256	2.7895			1.23256	2.48876
Std	1.19611	3.80936			1.19611	2.8642
N	72	72			72	71
SEM	0.140963	0.448937			0.140963	0.339918
STDx3	3.58833	11.4281			3.58833	8.59259
Plus mean	4.82089	14.2176			4.82089	11.0814
Fold Change		2.26318				2.01919
Fold Change STD		3.7915				3.03966
Fold Change SEM		0.446833				0.360742

## Sheet: SW480
	Data				CLEANED
	DR5				DR5
	Parental	OxR			Parental	OxR
t1	60.285	27.199		t1	60.285	27.199
	20.025	13.478			20.025	13.478
	98.79	2.64			98.79	2.64
	76.976	0.556			76.976	0.556
	81.873	17.663			81.873	17.663
2	38.349	4.637		2	38.349	4.637
	90.957	0.573			90.957	0.573
	53.251	3.439			53.251	3.439
	42.552	0.052			42.552	0.052
	47.554	1.598			47.554	1.598
3	31.245	21.866		3	31.245	21.866
	39.721	10.647			39.721	10.647
	34.007	35.379			34.007	35.379
	28.154	15.874			28.154	15.874
	35.275	10.786			35.275	10.786
4	83.298	144.277		4	83.298
	76.107	13.703			76.107	13.703
	89.133	5.749			89.133	5.749
	98.234	14.989			98.234	14.989
	7.364	12.192			7.364	12.192
5	102.142	37.48		5	102.142	37.48
	66.225	15.058			66.225	15.058
	60.233	38.436			60.233	38.436
	42.291	34.18			42.291	34.18
	67.562	89.099			67.562	89.099
t2	6.461	36.282		t2	6.461	36.282
	4.186	1.528			4.186	1.528
	2.97	2.119			2.97	2.119
	6.426	5.454			6.426	5.454
	3.56	5.923			3.56	5.923
2	2.397	0.313		2	2.397	0.313
	1.077	3.057			1.077	3.057
	4.915	4.55			4.915	4.55
	1.059	1.042			1.059	1.042
	2.536	1.476			2.536	1.476
3	1.737	21.311		3	1.737	21.311
	5.21	53.928			5.21	53.928
	4.724	187.055			4.724
	1.841	0.139			1.841	0.139
	20.998	1.737			20.998	1.737
4	1.303	0.452		4	1.303	0.452
	4.186	26.07			4.186	26.07
	0.625	8.424			0.625	8.424
	1.285	1.598			1.285	1.598
	3.838	0.921			3.838	0.921
5	40.798	0.643		5	40.798	0.643
	14.086	0.295			14.086	0.295
	34.198	1.719			34.198	1.719
	8.927	3.925			8.927	3.925
	3.856	1.893			3.856	1.893
t3	66.902	19.834		t3	66.902	19.834
	21.102	17.907			21.102	17.907
	34.285	5.801			34.285	5.801
	26.087	13.999			26.087	13.999
	19.227	18.497			19.227	18.497
2	20.025	1.806		2	20.025	1.806
	25.687	2.119			25.687	2.119
	25.427	2.866			25.427	2.866
	21.623	1.754			21.623	1.754
	103.115	4.342			103.115	4.342
3	6.061	4.898		3	6.061	4.898
	8.302	1.615			8.302	1.615
	9.935	8.267			9.935	8.267
	7.19	7.434			7.19	7.434
	5.853				5.853
4	4.203	2.623		4	4.203	2.623
	3.422	1.667			3.422	1.667
	4.22	0.816			4.22	0.816
	2.935	1.094			2.935	1.094
	3.665	1.633			3.665	1.633
5	3.769	4.151		5	3.769	4.151
	2.293	6.305			2.293	6.305
	2.049	6.774			2.049	6.774
	2.362	4.742			2.362	4.742
	4.967	2.657			4.967	2.657
Avg	27.8601	14.6893			27.8601	10.4955
Std	30.5453	29.252			30.5453	14.6965
N	75	74			75	72
SEM	3.52707	3.40048			3.52707	1.732
STDx3	91.6359	87.7561			91.6359	44.0896
Plus mean	119.496	102.445			119.496	54.5851
Fold Change		0.527251				0.37672
Fold Change STD		1.19857				0.669972
Fold Change SEM		0.139331				0.0789569

## Sheet: HT29
	Data				CLEANED
	DR5				DR5
	Parental	OxR			Parental	OxR
t1	0.538	1.945		t1	0.538	1.945
	0.729	3.005			0.729	3.005
	1.997	2.31			1.997	2.31
	2.657	1.737			2.657	1.737
	0.538	2.866			0.538	2.866
2	4.029	11.064		2	4.029	11.064
	1.598	12.401			1.598	12.401
	2.953	10.456			2.953	10.456
	2.675	6.583			2.675	6.583
	1.806	9.865			1.806	9.865
3	3.56	5.766		3	3.56	5.766
	3.352	7.156			3.352	7.156
	3.943	11.619			3.943	11.619
	2.067	7.573			2.067	7.573
	3.248	7.625			3.248	7.625
4	1.997	10.664		4	1.997	10.664
	3.491	7.468			3.491	7.468
	1.476	9.014			1.476	9.014
	4.967	5.193			4.967	5.193
	1.389	5.315			1.389	5.315
5	2.657	10.126		5	2.657	10.126
	4.22	9.014			4.22	9.014
	0.921	10.612			0.921	10.612
	2.119	12.123			2.119	12.123
	1.841	8.354			1.841	8.354
t2	0.261	1.355		t2	0.261	1.355
	0.226	0.677			0.226	0.677
	0.695	1.563			0.695	1.563
	6.166	1.685				1.685
	7.694	2.64				2.64
2	0.069	0.434		2	0.069	0.434
	0.261	0.243			0.261	0.243
	0.208	0.035			0.208	0.035
	0	0.035			0	0.035
	0.243	0.087			0.243	0.087
3	0.538	1.685		3	0.538	1.685
	0.052	0.382			0.052	0.382
	0.052	0.556			0.052	0.556
	0.052	0.174			0.052	0.174
	0.035	0.399			0.035	0.399
4	1.059	2.623		4	1.059	2.623
	0.226	0.712			0.226	0.712
	0.677	0.399			0.677	0.399
	0.33	0.226			0.33	0.226
	0.573	0.122			0.573	0.122
5	0.226	8.597		5	0.226	8.597
	0.729	0.938			0.729	0.938
	0.208	3.491			0.208	3.491
	0.591	1.65			0.591	1.65
	0.122	2.727			0.122	2.727
t3	0.521	2.24		t3	0.521	2.24
	0.399	0.243			0.399	0.243
	0.399	0.261			0.399	0.261
	0.33	0.104			0.33	0.104
	0.035	0.434			0.035	0.434
2	0.452	0.122		2	0.452	0.122
	0.191	0.347			0.191	0.347
	0.122	0.156			0.122	0.156
	1.198	0.139			1.198	0.139
	0.556	0			0.556	0
3	0.208	1.112		3	0.208	1.112
	0.521	0.747			0.521	0.747
	0.313	0.243			0.313	0.243
	1.042	0.191			1.042	0.191
	0.295	1.007			0.295	1.007
4	0.069	3.508		4	0.069	3.508
	0.382	0.347			0.382	0.347
	0.365	0.278			0.365	0.278
	0.399	0.278			0.399	0.278
	0.226	0.243			0.226	0.243
5	0.347	0.382		5	0.347	0.382
	0.104	0.695			0.104	0.695
	0.747	0.434			0.747	0.434
	0.069	0.382			0.069	0.382
	0.434	0.226			0.434	0.226
Avg	1.2238	3.16544			1.06747	3.16544
Std	1.53882	3.83535			1.22488	3.83535
N	75	75			73	75
SEM	0.177688	0.442868			0.143362	0.442868
STDx3	4.61646	11.506			3.67464	11.506
Plus mean	5.84026	14.6715			4.74211	14.6715
Fold Change		2.58657				2.96538
Fold Change STD		4.5166				4.94848
Fold Change SEM		0.521532				0.571401
