# Supplementary material for: Oxaliplatin resistance in colorectal cancer enhances TRAIL sensitivity via death receptor 4 upregulation and lipid raft localization
Source: eLife. 2021 Aug 3;10:e67750. doi: 10.7554/eLife.67750 (PMC8331188; doi:10.7554/eLife.67750)
Supplement: Figure 3—figure supplement 5—source data 1. [file elife-67750-fig3-figsupp5-data1.xlsx]

## Sheet: Sheet1
Figure 3- figure supplement 5
	DR5 - HCT116 Cell Lysate Sample					Table Analyzed	Revisions HCT116 DR5 Whole Cell			DR5 - SW620 Cell Lysate Sample					Table Analyzed	Revisions SW620 DR5 Whole Cell
		DR5 -	GAPDH -	DR5/GAPDH							DR5 -	GAPDH -	DR5/GAPDH
		Flux	Flux			Column B	OXR				Flux	Flux			Column B	OXR
	Parental T1	0.715	7.73	0.0924968		vs.	vs.			Parental T1	0.298	4.53	0.0657837		vs.	vs.
	OXR T1	0.803	7.69	0.104421		Column A	Parental			OXR T1	0.179	4.16	0.0430288		Column A	Parental
	Parental T2	0.312	3.6	0.0866667						Parental T2	0.361	5.05	0.0714851
	OXR T2	0.308	3.24	0.0950617		Unpaired t test				OXR T2	0.179	4.56	0.0392544		Unpaired t test
	Parental T3	0.201	3.2	0.0628125		P value	0.3896			Parental T3	0.217	3.65	0.0594521		P value	0.0036
	OXR T3	0.231	4.01	0.057606		P value summary	ns			OXR T3	0.171	3.55	0.048169		P value summary	**
						Significantly different (P < 0.05)?	No								Significantly different (P < 0.05)?	Yes
						One- or two-tailed P value?	One-tailed								One- or two-tailed P value?	One-tailed
						t, df	t=0.2998, df=4								t, df	t=5.062, df=4
						How big is the difference?									How big is the difference?
						Mean of column A	0.08067								Mean of column A	0.06533
						Mean of column B	0.08567								Mean of column B	0.04333
						Difference between means (B - A) ± SEM	0.005000 ± 0.01668								Difference between means (B - A) ± SEM	-0.02200 ± 0.004346
						95% confidence interval	-0.04131 to 0.05131								95% confidence interval	-0.03407 to -0.009933
						R squared (eta squared)	0.02197								R squared (eta squared)	0.865
						F test to compare variances									F test to compare variances
						F, DFn, Dfd	2.473, 2, 2								F, DFn, Dfd	1.787, 2, 2
						P value	0.5759								P value	0.7176
						P value summary	ns								P value summary	ns
						Significantly different (P < 0.05)?	No								Significantly different (P < 0.05)?	No
						Data analyzed									Data analyzed
						Sample size, column A	3								Sample size, column A	3
						Sample size, column B	3								Sample size, column B	3
