# Supplementary material for: Oxaliplatin resistance in colorectal cancer enhances TRAIL sensitivity via death receptor 4 upregulation and lipid raft localization
Source: eLife. 2021 Aug 3;10:e67750. doi: 10.7554/eLife.67750 (PMC8331188; doi:10.7554/eLife.67750)
Supplement: Figure 3—figure supplement 7—source data 1. [file elife-67750-fig3-figsupp7-data1.xlsx]

## Sheet: HCT116 DR4 agonist viability
Figure 3-figure supplement 7
Par	t1	82	t2	86.6	t3	84.25			OxR	t1	75.65	t2	80.85	t3	77.4
ug/ml DR4 agonist
0	82	82	86.1	87.1	87.3	81.2			0	78.2	73.1	81.8	79.9	77.4	77.4
0.01	74.6	72.2	75.2	77.4	79.4	81.2			0.01	67.5	66.2	74.2	73.9	74	81.4
0.1	52.2	48.8	59.5	53.3	55.7	51.7			0.1	41.5	43.7	49	50.9	48.9	46.1
1	34.7	35.5	37.5	37.5	37.2	36.3			1	20.3	21.6	27.6	31.6	24.6	25
10	29.6	25.7	29.8	27.7	29.5	28.5			10	13.8	15.7	18.5	14.4	17.1	14.2
Normalized
0	100	100	99.4226	100.577	103.62	96.3798			0	103.371	96.6292	101.175	98.825	100	100
0.01	90.9756	88.0488	86.836	89.3764	94.2433	96.3798			0.01	89.2267	87.5083	91.7749	91.4038	95.6072	105.168
0.1	63.6585	59.5122	68.7067	61.5473	66.1128	61.365			0.1	54.8579	57.766	60.6061	62.9561	63.1783	59.5607
1	42.3171	43.2927	43.3025	43.3025	44.1543	43.0861			1	26.8341	28.5525	34.1373	39.0847	31.7829	32.2997
10	36.0976	31.3415	34.4111	31.9861	35.0148	33.8279			10	18.2419	20.7535	22.8819	17.8108	22.093	18.3463

## Sheet: HCT116 DR4 agonist %apoptosis
Par	t1		t2		t3			OxR	t1		t2		t3
ug/ml DR4 agonist																	ug/ml DR4 agonist	Discovery?	P value	Mean of Parental	Mean of OxR	Difference	SE of difference	t ratio	df	q value
0	11.65	11.09	8.35	8.71	8.05	8.2		0	17.17	21.9	11.47	12.7	14.96	14.52
0.01	20.37	22.79	21.64	19.37	15.95	17.47		0.01	28.2	29.8	22.32	22.79	21.68	15.13			0.01	No	0.148692	19.6	23.32	-3.722	2.378	1.565	10	0.120143
0.1	41.6	44.1	36.94	43.35	41.4	45.42		0.1	53.1	50.2	44.4	42	44.6	47.1			0.1	No	0.044322	42.14	46.9	-4.765	2.073	2.299	10	0.044765
1	51	49.8	55.9	55.7	55.4	55.6		1	70	67.1	57.8	51.4	61.9	63.7			1	No	0.020722	53.9	61.98	-8.083	2.947	2.743	10	0.027906
10	53.2	54.3	60.5	60.6	59	57.9		10	69.5	65.4	61.8	69.3	67.6	67.2			10	Yes	0.000352	57.58	66.8	-9.217	1.742	5.292	10	0.001421
