# Supplementary material for: Oxaliplatin resistance in colorectal cancer enhances TRAIL sensitivity via death receptor 4 upregulation and lipid raft localization
Source: eLife. 2021 Aug 3;10:e67750. doi: 10.7554/eLife.67750 (PMC8331188; doi:10.7554/eLife.67750)
Supplement: Figure 3—source data 1. [file elife-67750-fig3-data1.xlsx]

## Sheet: HCT116
Figure 3 (related to panel C)
HCT116
	Data			CLEANED				Table Analyzed	HCT116 Dr4
	DR4			DR4
	Parental	OxR		Parental	OxR			Column B	OxR
t1	22.561	31.419		22.561	31.419			vs.	vs.
	61.57	15.11		61.57	15.11			Column A	Parental
	158.71	9.327			9.327
	74.77	13.634		74.77	13.634			Unpaired t test with Welch's correction
	29.508			29.508				P value	0.0007
2	25.184	2.188		25.184	2.188			P value summary	***
	16.361	3.752		16.361	3.752			Significantly different (P < 0.05)?	Yes
	55.943	3.178		55.943	3.178			One- or two-tailed P value?	Two-tailed
	42.135	13.235		42.135	13.235			Welch-corrected t, df	t=3.487, df=127.6
	20.807	4.012		20.807	4.012
3	74.37	9.205		74.37	9.205			How big is the difference?
	50.003	11.116		50.003	11.116			Mean of column A	24.28
	107.387	18.653		107.387	18.653			Mean of column B	43.82
	61.9	24.194		61.9	24.194			Difference between means (B - A) ± SEM	19.54 ± 5.603
	25.913	8.736		25.913	8.736			95% confidence interval	8.454 to 30.63
4		45.887			45.887			R squared (eta squared)	0.087
	106.692	39.808		106.692	39.808
	118.659	66.242		118.659	66.242			F test to compare variances
	29.873	53.424		29.873	53.424			F, DFn, Dfd	1.794, 69, 71
	40.572			40.572				P value	0.0154
5	58.27	13.13		58.27	13.13			P value summary	*
	147.143	22.7			22.7			Significantly different (P < 0.05)?	Yes
	26.643	23.273		26.643	23.273
	65.461	24.159		65.461	24.159			Data analyzed
	38.297	65.183		38.297	65.183			Sample size, column A	72
t2	3.769	37.116		3.769	37.116			Sample size, column B	70
	23.985	95.438		23.985	95.438
	2.588	31.349		2.588	31.349
	2.293	76.628		2.293	76.628
	1.685	106.936		1.685	106.936
2	4.238	111.59		4.238	111.59
	1.164	64.384		1.164	64.384
	1.216	258.976		1.216
	1.702	339.495		1.702
	4.099	45.4		4.099	45.4
3	1.511	162.027		1.511	162.027
	1.511	142.575		1.511	142.575
	0.729	58.044		0.729	58.044
	0.66	96.081		0.66	96.081
	2.223	99.763		2.223	99.763
4	3.647	33.677		3.647	33.677
	1.077	22.631		1.077	22.631
	4.082	16.378		4.082	16.378
	3.734	15.44		3.734	15.44
	1.389	9.379		1.389	9.379
5	0.417	52.938		0.417	52.938
	2.623	12.609		2.623	12.609
	1.494	78.903		1.494	78.903
	2.501	31.002		2.501	31.002
	1.476	21.693		1.476	21.693
t3	11.185	9.622		11.185	9.622
	17.82	13.061		17.82	13.061
	9.014	35.257		9.014	35.257
	10.126	24.576		10.126	24.576
	10.89	24.889		10.89	24.889
2	70.289	24.732		70.289	24.732
	10.438	32.044		10.438	32.044
	12.14	21.554		12.14	21.554
	31.037	24.281		31.037	24.281
	13.825	22.631		13.825	22.631
3	29.804	80.276		29.804	80.276
	49.03	145.753		49.03	145.753
	26.313	14.954		26.313	14.954
	27.32	87.066		27.32	87.066
	6.513	68.048		6.513	68.048
4	11.098	29.352		11.098	29.352
	3.977	26.73		3.977	26.73
	5.818	14.937		5.818	14.937
	10.872	52.834		10.872	52.834
	73.259	65.912		73.259	65.912
5	30.082	233.393		30.082
	8.041	136.757		8.041	136.757
	7.711	43.629		7.711	43.629
	23.916	63.376		23.916	63.376
	8.91	61.605		8.91	61.605
	27.7564	53.4149		24.2794	43.8203
Avg	34.6182	59.8258		27.9907	37.4821
Std	74	73		72	70
N	4.02428	7.00208		3.29874	4.47996
SEM
	103.855	179.478		83.9721	112.446
STDx3	131.611	232.892		108.252	156.266
Plus mean
		1.92442
Fold Change		3.22591
Fold Change STD		0.377564
Fold Change SEM

## Sheet: SW620
Figure 3 (related to panel C)
SW620
	Data			CLEANED					Table Analyzed	Sw620 Dr4
	DR4			DR4
	Parental	OxR		Parental	OxR				Column B	OxR
t1	0.339	49.968		0.339	49.968				vs.	vs.
	1.377	5.419		1.377	5.419				Column A	Parental
	1.248	17.542		1.248	17.542
	0.801	8.111		0.801	8.111				Unpaired t test with Welch's correction
	1.696	6.965		1.696	6.965				P value	<0.0001
2	0.33	13.596		0.33	13.596				P value summary	****
	0.625	15.021		0.625	15.021				Significantly different (P < 0.05)?	Yes
	0.816	35.245		0.816	35.245				One- or two-tailed P value?	Two-tailed
	1.303	26.751		1.303	26.751				Welch-corrected t, df	t=10.70, df=90.52
	0.174			0.174
3	0.63	26.124		0.63	26.124				How big is the difference?
	0.583	35.579		0.583	35.579				Mean of column A	4.452
		33.873			33.873				Mean of column B	21.45
		17.204			17.204				Difference between means (B - A) ± SEM	16.99 ± 1.589
		26.587			26.587				95% confidence interval	13.84 to 20.15
4	0.764	37.408		0.764	37.408				R squared (eta squared)	0.5583
	0.052	18.344		0.052	18.344
	0.035	9.29		0.035	9.29				F test to compare variances
	0.208	53.913		0.208	53.913				F, DFn, Dfd	7.842, 72, 70
	0.347	28.416		0.347	28.416				P value	<0.0001
5	0.486	31.92		0.486	31.92				P value summary	****
	0.087	6.721		0.087	6.721				Significantly different (P < 0.05)?	Yes
	0.365	7.399		0.365	7.399
	1.181	29.043		1.181	29.043				Data analyzed
	0.452	5.673		0.452	5.673				Sample size, column A	71
t2	16.343	41.301		16.343	41.301				Sample size, column B	73
	8.615	30.881		8.615	30.881
	11.984	29.526		11.984	29.526
	0.521	43.125		0.521	43.125
	0.122	36.89		0.122	36.89
2	3.804	19.852		3.804	19.852
	5.263	14.294		5.263	14.294
	10.872	7.625		10.872	7.625
	12.575	24.124		12.575	24.124
	6.391	7.573		6.391	7.573
3	9.691	19.904		9.691	19.904
	7.746	23.325		7.746	23.325
	11.341	51.948		11.341	51.948
	13.043	35.153		13.043	35.153
	8.667	26.504		8.667	26.504
4	1.355	25.566		1.355	25.566
	10.89	44.567		10.89	44.567
	2.449	28.032		2.449	28.032
	2.015	39.582		2.015	39.582
	1.251	34.163		1.251	34.163
5	44.81	28.015			28.015
	10.681	6.357		10.681	6.357
	4.359	15.267		4.359	15.267
	1.633	4.029		1.633	4.029
	2.223	72.564		2.223
t3	5.784	20.164		5.784	20.164
	4.967	15.44		4.967	15.44
	6.478	27.407		6.478	27.407
	2.414	12.071		2.414	12.071
	1.442	16.187		1.442	16.187
2	0.504	15.927		0.504	15.927
	3.126	9.535		3.126	9.535
	1.181	17.299		1.181	17.299
	6.999	24.559		6.999	24.559
	4.325	14.815		4.325	14.815
3	1.598	27.199		1.598	27.199
	3.665	32.861		3.665	32.861
	1.91	6.148		1.91	6.148
	2.779	7.746		2.779	7.746
	1.494	4.672		1.494	4.672
4	15.909	6.739		15.909	6.739
	8.493	34.702		8.493	34.702
	9.414	5.575		9.414	5.575
	1.581	9.813		1.581	9.813
	2.692	10.16		2.692	10.16
5	7.364	12.019		7.364	12.019
	11.532	11.011		11.532	11.011
	13.217	10.473		13.217	10.473
	7.451	13.842		7.451	13.842
	12.036	15.44		12.036	15.44
Avg	5.01247	22.1363		4.45194	21.4455
Std	6.51925	13.9033		4.5252	12.6742
N	72	74		71	73
SEM	0.768301	1.61622		0.537042	1.48341
STDx3	19.5578	41.7098		13.5756	38.0227
Plus mean	24.5702	63.846		18.0275	59.4682
Fold Change		4.41624
Fold Change STD		6.37845
Fold Change SEM		0.74148
Fold Change SEM
