# Supplementary material for: Oxaliplatin resistance in colorectal cancer enhances TRAIL sensitivity via death receptor 4 upregulation and lipid raft localization
Source: eLife. 2021 Aug 3;10:e67750. doi: 10.7554/eLife.67750 (PMC8331188; doi:10.7554/eLife.67750)
Supplement: Figure 3—source data 3. [file elife-67750-fig3-data3.xlsx]

## Sheet: Sheet1
Figure 3 (related to panel F)
	HCT116 Cell Lysate Sample						Table Analyzed	Revisions HCT116 DR4 Whole Cell		SW620 Cell Lysate Sample						Table Analyzed	Revisions SW620 DR4 Whole Cell
		DR4 -	GAPDH -	DR4/GAPDH							DR4 -	GAPDH -	DR4/GAPDH
		Flux	Flux				Column B	OXR			Flux	Flux				Column B	OXR
	Parental T1	1.32	3.13	0.421725			vs.	vs.		Parental T1	0.11	3.08	0.0357143			vs.	vs.
	OXR T1	1.53	3.24	0.472222			Column A	Parental		OXR T1	0.158	2.92	0.0541096			Column A	Parental
	Parental T2	1.43	3.29	0.43465						Parental T2	0.12	2.74	0.0437956
	OXR T2	1.57	3.92	0.40051			Unpaired t test			OXR T2	0.221	2.7	0.0818519			Unpaired t test
	Parental T3	1.01	3.79	0.266491			P value	0.2851		Parental T3	0.117	2.94	0.0397959			P value	0.0488
	OXR T3	1.59	4.34	0.366359			P value summary	ns		OXR T3	0.195	3.28	0.0594512			P value summary	*
							Significantly different (P < 0.05)?	No								Significantly different (P < 0.05)?	Yes
							One- or two-tailed P value?	One-tailed								One- or two-tailed P value?	Two-tailed
							t, df	t=0.6175, df=4								t, df	t=2.801, df=4
							How big is the difference?									How big is the difference?
							Mean of column A	0.3743								Mean of column A	0.04
							Mean of column B	0.413								Mean of column B	0.065
							Difference between means (B - A) ± SEM	0.03867 ± 0.06261								Difference between means (B - A) ± SEM	0.02500 ± 0.008926
							95% confidence interval	-0.1352 to 0.2125								95% confidence interval	0.0002185 to 0.04978
							R squared (eta squared)	0.08704								R squared (eta squared)	0.6623
							F test to compare variances									F test to compare variances
							F, DFn, Dfd	3.032, 2, 2								F, DFn, Dfd	13.94, 2, 2
							P value	0.496								P value	0.1339
							P value summary	ns								P value summary	ns
							Significantly different (P < 0.05)?	No								Significantly different (P < 0.05)?	No
							Data analyzed									Data analyzed
							Sample size, column A	3								Sample size, column A	3
							Sample size, column B	3								Sample size, column B	3
