# Supplementary material for: Oxaliplatin resistance in colorectal cancer enhances TRAIL sensitivity via death receptor 4 upregulation and lipid raft localization
Source: eLife. 2021 Aug 3;10:e67750. doi: 10.7554/eLife.67750 (PMC8331188; doi:10.7554/eLife.67750)
Supplement: Figure 3—source data 4. [file elife-67750-fig3-data4.xlsx]

## Sheet: SW620 DR4 agonist viability
Figure 3 (related to panel H)
Par	t1	87.8	t2	90.55	t3	90.6			OxR	t1	85.4	t2	85.95	t3	83.85
0	86.8	88.8	90.7	90.4	90.9	90.3			0	85.3	85.5	86.9	85	83.9	83.8
0.01	89.1	88.3	90.8	91.5	91.2	92.1			0.01	85	87.2	81.9	86.2	85.7	84.5
0.1	87.8	83	89.3	88.9	89	89.2			0.1	76.1	75.3	77.2	78.8	76.6	76.8
1	79.2	78.8	84.5	85.8	86.2	86.1			1	58.4	56	60.9	58.7	60.3	59.2
10	74.5	77.4	81.9	83.2	83.8	82.6			10	43.6	42.1	44.7	42	45.1	42.9
Normalized
0	98.861	101.139	100.166	99.8343	100.331	99.6689			0	99.8829	100.117	101.105	98.8947	100.06	99.9404
0.01	101.481	100.569	100.276	101.049	100.662	101.656			0.01	99.5316	102.108	95.288	100.291	102.206	100.775
0.1	100	94.533	98.6195	98.1778	98.234	98.4547			0.1	89.1101	88.1733	89.8197	91.6812	91.3536	91.5921
1	90.205	89.7494	93.3186	94.7543	95.1435	95.0331			1	68.3841	65.5738	70.8551	68.2955	71.9141	70.6023
10	84.8519	88.1549	90.4473	91.8829	92.4945	91.17			10	51.0539	49.2974	52.007	48.8656	53.7865	51.1628

## Sheet: SW620 DR4 %apoptosis
Figure 3 (related to panel G)
Par	t1		t2		t3			OxR	t1		t2		t3				Discovery?	P value	Mean of Parental	Mean of OxR	Difference	SE of difference	t ratio	df	q value
0	6.35	7.38	7.24	6.65	6.99	7.74		0	10.96	10.27	11.26	13.54	14.33	14.56
0.01	6.24	6.38	6.15	6.54	6.73	5.9		0.01	11.08	9.78	15.26	11.48	11.69	13.09		0.01	Yes	2.5e-05	6.323	12.06	-5.74	0.7824	7.336	10	3.1e-05
0.1	7.76	10.51	8.63	8.88	8.99	9.11		0.1	20.54	21	20.96	19.33	21.24	20.86		0.1	Yes	<0.000001	8.98	20.66	-11.68	0.4599	25.39	10	<0.000001
1	13.61	14.19	12.64	12.07	11.48	12.47		1	33.54	38.5	35.24	37.62	37.27	38.07		1	Yes	<0.000001	12.74	36.71	-23.96	0.8829	27.14	10	<0.000001
10	18.61	18.74	15.28	14.67	14.94	15.87		10	49.72	49.54	50.89	52.96	51.33	53.2		10	Yes	<0.000001	16.35	51.27	-34.92	0.9854	35.44	10	<0.000001

## Sheet: TRAIL sensitization
Figure 3 (related to panel I)
HCt116 DR4 agonist							Avg	Dev		HCt116 OxR DR4 agonist						Avg	Dev	% TRAIL Sensitization	SDNUm	TRAIL Sensitization SD
0	100	100	99.4226	100.577	103.62	96.3798	100	2.11653		103.371	96.6292	101.175	98.825	100	100	100	2.06098	0	2.9542	#DIV/0!
0.01	90.9756	88.0488	86.836	89.3764	94.2433	96.3798	90.9767	3.37005		89.2267	87.5083	91.7749	91.4038	95.6072	105.168	93.4481	5.8037	-2.71661	6.71119	7.37752
0.1	63.6585	59.5122	68.7067	61.5473	66.1128	61.365	63.4838	3.11538		54.8579	57.766	60.6061	62.9561	63.1783	59.5607	59.8208	2.90516	5.76983	4.25976	6.71596
1	42.3171	43.2927	43.3025	43.3025	44.1543	43.0861	43.2425	0.535724		26.8341	28.5525	34.1373	39.0847	31.7829	32.2997	32.1152	3.94525	25.7323	3.98146	9.21279
10	36.0976	31.3415	34.4111	31.9861	35.0148	33.8279	33.7798	1.65634		18.2419	20.7535	22.8819	17.8108	22.093	18.3463	20.0212	1.99456	40.7303	2.59263	7.93067
SW620 DR4 agonist										SW620 OxR DR4 agonist
0	98.861	101.139	100.166	99.8343	100.331	99.6689	100	0.691447		99.8829	100.117	101.105	98.8947	100.06	99.9404	100	0.642636	0	0.94397	#DIV/0!
0.01	101.481	100.569	100.276	101.049	100.662	101.656	100.949	0.495154		99.5316	102.108	95.288	100.291	102.206	100.775	100.033	2.32422	0.906985	2.37638	2.35405
0.1	100	94.533	98.6195	98.1778	98.234	98.4547	98.0032	1.66817		89.1101	88.1733	89.8197	91.6812	91.3536	91.5921	90.2883	1.34512	7.87205	2.14293	2.1907
1	90.205	89.7494	93.3186	94.7543	95.1435	95.0331	93.034	2.24642		68.3841	65.5738	70.8551	68.2955	71.9141	70.6023	69.2708	2.10854	25.5425	3.08096	3.36859
10	84.8519	88.1549	90.4473	91.8829	92.4945	91.17	89.8336	2.61654		51.0539	49.2974	52.007	48.8656	53.7865	51.1628	51.0289	1.64608	43.1962	3.09125	3.66388
