# Supplementary material for: Oxaliplatin resistance in colorectal cancer enhances TRAIL sensitivity via death receptor 4 upregulation and lipid raft localization
Source: eLife. 2021 Aug 3;10:e67750. doi: 10.7554/eLife.67750 (PMC8331188; doi:10.7554/eLife.67750)
Supplement: Figure 4—figure supplement 1—source data 1. [file elife-67750-fig4-figsupp1-data1.xlsx]

## Sheet: Statistics
Figure 4-figure supplement 1
Table Analyzed	HCT116 dr4		Table Analyzed	SW620 dr4		Table Analyzed	sw480 dr4		Table Analyzed	ht29 dr4
Column B	OxR		Column B	OxR		Column B	OxR		Column B	OxR
vs.	vs.		vs.	vs.		vs.	vs.		vs.	vs.
Column A	Parental		Column A	Parental		Column A	Parental		Column A	Parental
Unpaired t test			Unpaired t test			Unpaired t test			Unpaired t test
P value	0.0126		P value	0.0465		P value	0.9351		P value	0.0049
P value summary	*		P value summary	*		P value summary	ns		P value summary	**
Significantly different (P < 0.05)?	Yes		Significantly different (P < 0.05)?	Yes		Significantly different (P < 0.05)?	No		Significantly different (P < 0.05)?	Yes
One- or two-tailed P value?	Two-tailed		One- or two-tailed P value?	Two-tailed		One- or two-tailed P value?	Two-tailed		One- or two-tailed P value?	Two-tailed
t, df	t=2.665, df=28		t, df	t=2.083, df=28		t, df	t=0.08218, df=28		t, df	t=3.056, df=28
How big is the difference?			How big is the difference?			How big is the difference?			How big is the difference?
Mean of column A	0.1913		Mean of column A	0.03773		Mean of column A	0.1632		Mean of column A	0.3649
Mean of column B	0.3501		Mean of column B	0.09127		Mean of column B	0.1676		Mean of column B	0.2181
Difference between means (B - A) ± SEM	0.1588 ± 0.05959		Difference between means (B - A) ± SEM	0.05353 ± 0.02570		Difference between means (B - A) ± SEM	0.004400 ± 0.05354		Difference between means (B - A) ± SEM	-0.1467 ± 0.04802
95% confidence interval	0.03673 to 0.2809		95% confidence interval	0.0008857 to 0.1062		95% confidence interval	-0.1053 to 0.1141		95% confidence interval	-0.2451 to -0.04837
R squared (eta squared)	0.2023		R squared (eta squared)	0.1342		R squared (eta squared)	0.0002412		R squared (eta squared)	0.2501
F test to compare variances			F test to compare variances			F test to compare variances			F test to compare variances
F, DFn, Dfd	1.661, 14, 14		F, DFn, Dfd	5.923, 14, 14		F, DFn, Dfd	2.623, 14, 14		F, DFn, Dfd	1.500, 14, 14
P value	0.3535		P value	0.002		P value	0.0819		P value	0.4574
P value summary	ns		P value summary	**		P value summary	ns		P value summary	ns
Significantly different (P < 0.05)?	No		Significantly different (P < 0.05)?	Yes		Significantly different (P < 0.05)?	No		Significantly different (P < 0.05)?	No
Data analyzed			Data analyzed			Data analyzed			Data analyzed
Sample size, column A	15		Sample size, column A	15		Sample size, column A	15		Sample size, column A	15
Sample size, column B	15		Sample size, column B	15		Sample size, column B	15		Sample size, column B	15

## Sheet: HCT116
Manders Correlation Coef			HCT116
Parental	OxR
0.111	0.542
0.109	0.227
0.231	0.119
0.116	0.322
0.085	0.21
0.062	0.323
0.023	0.372
0.043	0.235
0.177	0.324
0.299	0.381
0.142	0.035
0.208	0.449
0.44	0.735
0.474	0.371
0.35	0.607

## Sheet: SW620
Manders Correlation Coef			SW620
Parental	OxR
0.002	0.078
0.003	0.209
0.005	0.182
0.003	0.181
0.002	0.055
0.001	0.009
0.1	0.01
0.095	0.309
0.017	0.019
0.079	0.038
0.081	0.021
0.024	0.116
0.036	0.115
0.073	0.014
0.045	0.013

## Sheet: SW480
Manders Correlation Coef			SW480
Parental	OxR
0.204	0.242
0.35	0.183
0.467	0.097
0.119	0.035
0.048	0.048
0.014	0.019
0.01	0.114
0.089	0.202
0.044	0.16
0.05	0.176
0.056	0.056
0.092	0.301
0.124	0.401
0.605	0.272
0.176	0.208

## Sheet: HT29
Manders Correlation Coef			HT29
Parental	OxR
0.516	0.163
0.372	0.301
0.325	0.179
0.383	0.307
0.433	0.435
0.55	0.499
0.346	0.174
0.281	0.17
0.434	0.053
0.395	0.059
0.444	0.058
0.108	0.18
0.169	0.076
0.303	0.42
0.414	0.198
