# Supplementary material for: Oxaliplatin resistance in colorectal cancer enhances TRAIL sensitivity via death receptor 4 upregulation and lipid raft localization
Source: eLife. 2021 Aug 3;10:e67750. doi: 10.7554/eLife.67750 (PMC8331188; doi:10.7554/eLife.67750)
Supplement: Figure 4—figure supplement 2—source data 1. [file elife-67750-fig4-figsupp2-data1.xlsx]

## Sheet: Statistics
Figure 4-figure supplement 2
Table Analyzed	HCT116 Dr5 coloc		Table Analyzed	Sw620 Dr5 coloc		Table Analyzed	SW480 Dr5 coloc		Table Analyzed	HT29 Dr5 coloc
Column B	OxR		Column B	OxR		Column B	OxR		Column B	OxR
vs.	vs.		vs.	vs.		vs.	vs.		vs.	vs.
Column A	Parental		Column A	Parental		Column A	Parental		Column A	Parental
Unpaired t test with Welch's correction			Unpaired t test with Welch's correction			Unpaired t test with Welch's correction			Unpaired t test with Welch's correction
P value	0.0024		P value	0.9134		P value	<0.0001		P value	0.0463
P value summary	**		P value summary	ns		P value summary	****		P value summary	*
Significantly different (P < 0.05)?	Yes		Significantly different (P < 0.05)?	No		Significantly different (P < 0.05)?	Yes		Significantly different (P < 0.05)?	Yes
One- or two-tailed P value?	Two-tailed		One- or two-tailed P value?	Two-tailed		One- or two-tailed P value?	Two-tailed		One- or two-tailed P value?	Two-tailed
Welch-corrected t, df	t=3.138, df=80.07		Welch-corrected t, df	t=0.1090, df=122.4		Welch-corrected t, df	t=5.326, df=76.68		Welch-corrected t, df	t=2.021, df=89.57
How big is the difference?			How big is the difference?			How big is the difference?			How big is the difference?
Mean of column A	0.0427		Mean of column A	0.3678		Mean of column A	9.17		Mean of column A	0.05227
Mean of column B	0.1882		Mean of column B	0.3806		Mean of column B	1.491		Mean of column B	0.1223
Difference between means (B - A) ± SEM	0.1455 ± 0.04638		Difference between means (B - A) ± SEM	0.01275 ± 0.1169		Difference between means (B - A) ± SEM	-7.679 ± 1.442		Difference between means (B - A) ± SEM	0.07001 ± 0.03464
95% confidence interval	0.05322 to 0.2378		95% confidence interval	-0.2188 to 0.2442		95% confidence interval	-10.55 to -4.808		95% confidence interval	0.001179 to 0.1388
R squared (eta squared)	0.1095		R squared (eta squared)	9.701e-05		R squared (eta squared)	0.27		R squared (eta squared)	0.0436
F test to compare variances			F test to compare variances			F test to compare variances			F test to compare variances
F, DFn, Dfd	20.61, 73, 73		F, DFn, Dfd	2.219, 70, 70		F, DFn, Dfd	40.21, 73, 72		F, DFn, Dfd	9.638, 74, 72
P value	<0.0001		P value	0.001		P value	<0.0001		P value	<0.0001
P value summary	****		P value summary	**		P value summary	****		P value summary	****
Significantly different (P < 0.05)?	Yes		Significantly different (P < 0.05)?	Yes		Significantly different (P < 0.05)?	Yes		Significantly different (P < 0.05)?	Yes
Data analyzed			Data analyzed			Data analyzed			Data analyzed
Sample size, column A	74		Sample size, column A	71		Sample size, column A	74		Sample size, column A	73
Sample size, column B	74		Sample size, column B	71		Sample size, column B	73		Sample size, column B	75

## Sheet: HCT116
HCT116	Data				CLEANED
	DR5 Coloc				DR5 Coloc
	Parental	OxR			Parental	OxR
t1	0	0		t1	0	0
	0	0			0	0
	0	0			0	0
	0	0			0	0
	0	0			0	0
2	0	0		2	0	0
	0	0			0	0
	0.017	0			0.017	0
	0.069	0			0.069	0
	0	0			0	0
3	0.087	0		3	0.087	0
	0	0			0	0
	0.243	0			0.243	0
	0.035	0			0.035	0
	0.122	0			0.122	0
4	0	0.573		4	0	0.573
	0.347	0.434				0.434
	0	1.077			0	1.077
	0.243	0.973			0.243	0.973
	0.069	0			0.069	0
5	0	0.122		5	0	0.122
	0	0			0	0
	0	0			0	0
	0	0			0	0
	0	0			0	0
t2	0	0		t2	0	0
	0	0			0	0
	0	0			0	0
	0	0			0	0
	0.052	0			0.052	0
2	0	0		2	0	0
	0	0			0	0
	0	0			0	0
	0	0			0	0
	0	0			0	0
3	0	0		3	0	0
	0	0			0	0
	0.035	0			0.035	0
	0.035	0			0.035	0
	0.017	0			0.017	0
4	0	0		4	0	0
	0	0			0	0
	0	0			0	0
	0	0			0	0
	0	0			0	0
5	0	0		5	0	0
	0.052	0			0.052	0
	0	0			0	0
	0	0			0	0
	0.122	0			0.122	0
t3	0.035	0.035		t3	0.035	0.035
	0.33	0.347			0.33	0.347
	0	0.052			0	0.052
	0.191	0.139			0.191	0.139
	0.035	0.417			0.035	0.417
2	0.052	0.017		2	0.052	0.017
	0	0.834			0	0.834
	0.052	1.181			0.052	1.181
	0.104	1.806			0.104	1.806
	0.035	1.198			0.035	1.198
3	0	1.407		3	0	1.407
	0.104	1.65			0.104
	0.104	0.017			0.104	0.017
	0	0.903			0	0.903
	0	0.261			0	0.261
4	0.069	0.399		4	0.069	0.399
	0.139	0.313			0.139	0.313
	0.087	0.017			0.087	0.017
	0.017	0.104			0.017	0.104
	0	0.156			0	0.156
5	0.521	0.035		5	0.521	0.035
	0	0.087			0	0.087
	0.087	0.069			0.087	0.069
	0	0.886			0	0.886
	0	0.069			0	0.069
Avg	0.04676	0.207707			0.0427027	0.188216
Std	0.0915716	0.419356			0.0852294	0.386969
N	75	75			74	74
SEM	0.0105738	0.0484231			0.00990771	0.0449842
STDx3	0.274715	1.25807			0.255688	1.16091
Plus mean	0.321475	1.46577			0.298391	1.34912
Fold Change		4.44197				4.40759
Fold Change STD		12.494				12.6296
Fold Change SEM		1.44268				1.46816

## Sheet: SW620
SW620	Data				CLEANED
	DR5 Coloc				DR5 Coloc
	Parental	OxR			Parental	OxR
t1	0.035	0			0.035	0
	0.017	0			0.017	0
	0.052	0			0.052	0
	0	0			0	0
	0	0			0	0
2	0.295	0.017			0.295	0.017
	0.035	0.035			0.035	0.035
	0	0			0	0
	0	0.052			0	0.052
	0	0			0	0
3	0	0			0	0
	0	0			0	0
	0	0			0	0
	0	0			0	0
	0	0			0	0
4	0.032	0			0.032	0
	0.07	0.086			0.07	0.086
5	0	0			0	0
	0	0			0	0
	0	0			0	0
	0	0			0	0
	0	0			0	0
t2	0.174	0.382			0.174	0.382
	0.087	0.017			0.087	0.017
	0.017	0			0.017	0
	0.035	0			0.035	0
	0.052	0			0.052	0
2	1.511	0.903			1.511	0.903
	0.799	0			0.799	0
	0.799	0			0.799	0
	1.112	0			1.112	0
	0.208	1.251			0.208	1.251
3	0.087	4.012			0.087	4.012
	0.069	1.876			0.069	1.876
	0.122	0.955			0.122	0.955
	0	0.261			0	0.261
	0	0			0	0
4	0	2.136			0	2.136
	0.017	2.484			0.017	2.484
	0.069	0.33			0.069	0.33
	0.521	0			0.521	0
	0.816	2.466			0.816	2.466
5	0.243	0			0.243	0
	0.347	0.347			0.347	0.347
	0	0.156			0	0.156
	0.017	0			0.017	0
	0.278	0.052			0.278	0.052
t3	2.015	0.382			2.015	0.382
	0.243	7.92			0.243
	1.806	0			1.806	0
	1.806	1.233			1.806	1.233
	2.953	0.069				0.069
2	0.434	0.313			0.434	0.313
	1.91	0.035			1.91	0.035
	0.243	1.007			0.243	1.007
	0.035	0			0.035	0
	2.067	0.017			2.067	0.017
3	0.573	0			0.573	0
	0.66	0			0.66	0
	0.278	0			0.278	0
	0.504	0.069			0.504	0.069
	0.452	0			0.452	0
4	0.278	0.052			0.278	0.052
	0.382	0.747			0.382	0.747
	0.087	0.33			0.087	0.33
	0.104	0.764			0.104	0.764
	0.486	0.087			0.486	0.087
5	1.129	0.087			1.129	0.087
	1.372	0.452			1.372	0.452
	0.764	3.56			0.764	3.56
	0.174	0			0.174	0
	0.399	0			0.399	0
Avg	0.40375	0.485306			0.367845	0.380592
Std	0.620363	1.19553			0.545391	0.812364
N	72	72			71	71
SEM	0.0731105	0.140894			0.064726	0.0964099
STDx3	1.86109	3.58658			1.63617	2.43709
Plus mean	2.26484	4.07189			2.00402	2.81768
Fold Change		1.202				1.03465
Fold Change STD		3.48981				2.68896
Fold Change SEM		0.411279				0.319121

## Sheet: SW480
SW480	Data				Cleaned
	DR5 Coloc				DR5 Coloc
	Parental	OxR			Parental	OxR
t1	8.441	3.804		t1	8.441	3.804
	7.625	1.91			7.625	1.91
	11.202	0.434			11.202	0.434
	8.615	0.035			8.615	0.035
	19.279	2.848			19.279	2.848
2	38.349	1.702		2	38.349	1.702
	59.486	0.052				0.052
	35.327	1.598			35.327	1.598
	37.411	0.035			37.411	0.035
	25.462	0.052			25.462	0.052
3	31.245	1.424		3	31.245	1.424
	39.721	1.233			39.721	1.233
	27.337	3.161			27.337	3.161
	45.07	1.285			45.07	1.285
	46.217	0.868			46.217	0.868
4	16.778	41.527		4	16.778
	13.495	3.387			13.495	3.387
	25.844	0.591			25.844	0.591
	22.787	3.352			22.787	3.352
	0.886	1.772			0.886	1.772
5	29.04	5.367		5	29.04	5.367
	12.453	3.977			12.453	3.977
	3.595	1.563			3.595	1.563
	1.806	1.059			1.806	1.059
	3.995	11.046			3.995	11.046
t2	3.613	6.53		t2	3.613	6.53
	2.675	0.313			2.675	0.313
	1.407	0.469			1.407	0.469
	3.144	1.546			3.144	1.546
	2.136	1.772			2.136	1.772
2	0.816	0.069		2	0.816	0.069
	0.469	0.434			0.469	0.434
	1.685	1.581			1.685	1.581
	0.486	0.278			0.486	0.278
	0.921	0.261			0.921	0.261
3	0.66	0.174		3	0.66	0.174
	1.772	1.303			1.772	1.303
	1.459	2.64			1.459	2.64
	0.782	0.017			0.782	0.017
	4.655	0.452			4.655	0.452
4	0.347	0.156		4	0.347	0.156
	0.226	6.287			0.226	6.287
	0.226	0.295			0.226	0.295
	0.608	0			0.608	0
	0.191	0.052			0.191	0.052
5	11.758	0		5	11.758	0
	4.203	0			4.203	0
	8.302	0.035			8.302	0.035
	6.044	0.052			6.044	0.052
	1.059	0.052			1.059	0.052
t3	22.075	5.593		t3	22.075	5.593
	8.424	3.699			8.424	3.699
	8.545	0.851			8.545	0.851
	7.555	3.786			7.555	3.786
	9.483	1.598			9.483	1.598
2	5.263	0.868		2	5.263	0.868
	6.322	0.365			6.322	0.365
	2.31	0.591			2.31	0.591
	8.51	0.33			8.51	0.33
	17.003	0.069			17.003	0.069
3	1.372	2.449		3	1.372	2.449
	1.841	1.129			1.841	1.129
	1.042	0.226			1.042	0.226
	1.164	0.66			1.164	0.66
	0.452				0.452
4	1.007	2.24		4	1.007	2.24
	0.782	0.921			0.782	0.921
	0.243	0.278			0.243	0.278
	0.191	0			0.191	0
	0.695	0.712			0.695	0.712
5	1.129	2.518		5	1.129	2.518
	0.382	1.094			0.382	1.094
	0.313	0.99			0.313	0.99
	0.399	0.208			0.399	0.208
	0.417	0.313			0.417	0.313
Avg	9.84039	2.03159			9.1695	1.49056
Std	13.3923	4.99994			12.1664	1.91854
N	75	74			74	73
SEM	1.54641	0.581231			1.41431	0.224548
STDx3	40.1768	14.9998			36.4991	5.75561
Plus mean	50.0172	17.0314			45.6686	7.24617
Fold Change		0.206455				0.162556
Fold Change STD		0.580617				0.300495
Fold Change SEM		0.0674954				0.0351703

## Sheet: HT29
	Data				CLEANED
	DR5 Coloc				DR5 Coloc
	Parental	OxR			Parental	OxR
t1	0.087	0.052		t1	0.087	0.052
	0	0			0	0
	0	0.052			0	0.052
	0	0.017			0	0.017
	0.087	0.104			0.087	0.104
2	0.087	0.087		2	0.087	0.087
	0.017	0.017			0.017	0.017
	0.035	0			0.035	0
	0.017	0.782			0.017	0.782
	0	0			0	0
3	0.313	0.174		3	0.313	0.174
	0.069	0.278			0.069	0.278
	0	0.052			0	0.052
	0.104	0.139			0.104	0.139
	0.313	0.104			0.313	0.104
4	0.017	0.921		4	0.017	0.921
	0.104	1.737			0.104	1.737
	0.087	0.747			0.087	0.747
	0	0			0	0
	0.087	0			0.087	0
5	0.208	0.174		5	0.208	0.174
	0.017	0.226			0.017	0.226
	0	0.399			0	0.399
	0	0.591			0	0.591
	0	0.069			0	0.069
t2	0.226	0.017		t2	0.226	0.017
	0.174	0.035			0.174	0.035
	0.382	0.087			0.382	0.087
	2.379	0.052				0.052
	2.605	0.035				0.035
2	0	0		2	0	0
	0.017	0			0.017	0
	0.035	0			0.035	0
	0	0			0	0
	0	0			0	0
3	0.174	0.139		3	0.174	0.139
	0	0			0	0
	0.017	0			0.017	0
	0.017	0			0.017	0
	0	0			0	0
4	0	0		4	0	0
	0	0			0	0
	0.017	0			0.017	0
	0.017	0			0.017	0
	0	0			0	0
5	0.052	0.347		5	0.052	0.347
	0.347	0			0.347	0
	0.017	0			0.017	0
	0.017	0			0.017	0
	0	0.087			0	0.087
t3	0.191	0.938		t3	0.191	0.938
	0	0			0	0
	0	0			0	0
	0.191	0			0.191	0
	0	0			0	0
2	0.208	0		2	0.208	0
	0.017	0			0.017	0
	0.017	0			0.017	0
	0	0.035			0	0.035
	0	0			0	0
3	0	0		3	0	0
	0.017	0.017			0.017	0.017
	0	0			0	0
	0	0			0	0
	0	0			0	0
4	0	0.538		4	0	0.538
	0	0.122			0	0.122
	0	0			0	0
	0	0			0	0
	0	0			0	0
5	0	0		5	0	0
	0.017	0			0.017	0
	0	0			0	0
	0	0			0	0
	0	0			0	0
Avg	0.117333	0.12228			0.052274	0.12228
Std	0.403654	0.283287			0.0912349	0.283287
N	75	75			73	75
SEM	0.04661	0.0327112			0.0106782	0.0327112
STDx3	1.21096	0.849862			0.273705	0.849862
Plus mean	1.3283	0.972142			0.325979	0.972142
Fold Change		1.04216				2.33921
Fold Change STD		4.32243				6.78505
Fold Change SEM		0.499111				0.78347
