# Supplementary material for: Oxaliplatin resistance in colorectal cancer enhances TRAIL sensitivity via death receptor 4 upregulation and lipid raft localization
Source: eLife. 2021 Aug 3;10:e67750. doi: 10.7554/eLife.67750 (PMC8331188; doi:10.7554/eLife.67750)
Supplement: Figure 4—figure supplement 2—source data 2. [file elife-67750-fig4-figsupp2-data2.xlsx]

## Sheet: DR5 total area
Figure 4-figure supplement 2 (related to C)									Linear regression
		X		Y					Best-fit values
		Max TRAIL sensitization	Max TRAIL sensitization (SEM)	Fold Change DR5 coloc	Fold Change DR5 coloc (SD)	N (cells)			Slope	0.04697
	SW480	0.35	1.1498	0.162556	0.300495	73			Y-intercept	0.5693
	HT29	13.87	4.86727	2.33921	6.78505	73			X-intercept	-12.12
	SW620	44.85	3.82	1.03465	2.68896	71			1/slope	21.29
	HCT116	61.57	8.14448	4.40759	12.6296	74
									Std. Error
									Slope	0.03263
									Y-intercept	1.263
									95% Confidence Intervals
									Slope	-0.09344 to 0.1874
									Y-intercept	-4.867 to 6.005
									X-intercept	-infinity to +infinity
									Goodness of Fit
									R squared	0.5088
									Sy.x	1.584
									Is slope significantly non-zero?
									F	2.072
									DFn, DFd	1, 2
									P value	0.2867
									Deviation from zero?	Not Significant
									Equation	Y = 0.04697*X + 0.5693
									Data
									Number of X values	4
									Maximum number of Y replicates	1
									Total number of values	4
									Number of missing values	0

## Sheet: DR5 coloc
Figure 4-figure supplement 2 (related to C)									Linear regression
		X		Y					Best-fit values
		Max TRAIL sensitization	Max TRAIL sensitization (SEM)	Fold Change DR5 coloc	Fold Change DR5 coloc (SD)	N (cells)			Slope	0.03386
	SW480	0.35	1.1498	0.37672	0.669972	72			Y-intercept	1.192
	HT29	13.87	4.86727	2.96538	4.94848	75			X-intercept	-35.2
	SW620	44.85	3.82693	2.01919	3.03966	71			1/slope	29.53
	HCT116	61.57	8.14448	3.49144	8.91841	74
									Std. Error
									Slope	0.02484
									Y-intercept	0.9617
									95% Confidence Intervals
									Slope	-0.07302 to 0.1407
									Y-intercept	-2.946 to 5.330
									X-intercept	-infinity to +infinity
									Goodness of Fit
									R squared	0.4816
									Sy.x	1.206
									Is slope significantly non-zero?
									F	1.858
									DFn, DFd	1, 2
									P value	0.306
									Deviation from zero?	Not Significant
									Equation	Y = 0.03386*X + 1.192
									Data
									Number of X values	4
									Maximum number of Y replicates	1
									Total number of values	4
									Number of missing values	0
