# Supplementary material for: Oxaliplatin resistance in colorectal cancer enhances TRAIL sensitivity via death receptor 4 upregulation and lipid raft localization
Source: eLife. 2021 Aug 3;10:e67750. doi: 10.7554/eLife.67750 (PMC8331188; doi:10.7554/eLife.67750)
Supplement: Figure 4—figure supplement 3—source data 1. [file elife-67750-fig4-figsupp3-data1.xlsx]

## Sheet: Statistics
Figure 4-figure supplement 3
Table Analyzed	hct116 lipid raft		Table Analyzed	Sw620 lipid raft		Table Analyzed	Sw480 lipid raft		Table Analyzed	ht29 lipid raft
Column B	OxR		Column B	OxR		Column B	OxR		Column B	OxR
vs.	vs.		vs.	vs.		vs.	vs.		vs.	vs.
Column A	Parental		Column A	Parental		Column A	Parental		Column A	Parental
Unpaired t test with Welch's correction			Unpaired t test with Welch's correction			Unpaired t test with Welch's correction			Unpaired t test with Welch's correction
P value	0.4786		P value	0.6093		P value	0.3528		P value	<0.0001
P value summary	ns		P value summary	ns		P value summary	ns		P value summary	****
Significantly different (P < 0.05)?	No		Significantly different (P < 0.05)?	No		Significantly different (P < 0.05)?	No		Significantly different (P < 0.05)?	Yes
One- or two-tailed P value?	Two-tailed		One- or two-tailed P value?	Two-tailed		One- or two-tailed P value?	Two-tailed		One- or two-tailed P value?	Two-tailed
Welch-corrected t, df	t=0.7095, df=294.0		Welch-corrected t, df	t=0.5117, df=260.3		Welch-corrected t, df	t=0.9308, df=290.8		Welch-corrected t, df	t=4.152, df=236.8
How big is the difference?			How big is the difference?			How big is the difference?			How big is the difference?
Mean of column A	85.9		Mean of column A	30.65		Mean of column A	250.4		Mean of column A	19.56
Mean of column B	92.81		Mean of column B	27.8		Mean of column B	228.1		Mean of column B	8.238
Difference between means (B - A) ± SEM	6.902 ± 9.729		Difference between means (B - A) ± SEM	-2.854 ± 5.576		Difference between means (B - A) ± SEM	-22.30 ± 23.96		Difference between means (B - A) ± SEM	-11.32 ± 2.726
95% confidence interval	-12.24 to 26.05		95% confidence interval	-13.83 to 8.127		95% confidence interval	-69.47 to 24.86		95% confidence interval	-16.69 to -5.949
R squared (eta squared)	0.001709		R squared (eta squared)	0.001005		R squared (eta squared)	0.00297		R squared (eta squared)	0.06786
F test to compare variances			F test to compare variances			F test to compare variances			F test to compare variances
F, DFn, Dfd	1.265, 149, 149		F, DFn, Dfd	2.228, 149, 149		F, DFn, Dfd	1.006, 144, 147		F, DFn, Dfd	3.108, 149, 146
P value	0.1523		P value	<0.0001		P value	0.9712		P value	<0.0001
P value summary	ns		P value summary	****		P value summary	ns		P value summary	****
Significantly different (P < 0.05)?	No		Significantly different (P < 0.05)?	Yes		Significantly different (P < 0.05)?	No		Significantly different (P < 0.05)?	Yes
Data analyzed			Data analyzed			Data analyzed			Data analyzed
Sample size, column A	150		Sample size, column A	150		Sample size, column A	148		Sample size, column A	150
Sample size, column B	150		Sample size, column B	150		Sample size, column B	145		Sample size, column B	147

## Sheet: All cell lines
	Data			Data			Data			Data
	HCT116			SW620			SW480			HT29
	Parental	OxR		Parental	OxR		Parental	OxR		Parental	OxR
t1	195.166	83.141	t1	0	23.1	t1	309.274	302.727	t1	22.665	0.035
	75.1	68.014		0.608	0		415.845	192.943		11.463	0.139
	0.556	83.541		0.226	0		120.031	443.756		29.37	5.106
	48.422	71.904		0	0.104		241.66	283.396		28.71	0.156
	59.295	0		0	0.069		17.177	153.691		33.573	0.069
2	64.748	28.102	2	14.363	19.661	2	405.893	381.491	2	24.975	3.369
	44.497	96.619		30.742	0.347		305.332	213.906		9.448	5.905
	0.538	68.656		25.67	0.243		195.478	281.59		13.096	2.171
	4.151	145.493		20.442	0.017		384.461	123.592		13.46	1.685
	13.2	16.396		0.851	0.243		293.174	505.986		8.58	0.868
3	39.912	59.347	3	76.507	250.257	3	380.987	582.128	3	19.331	1.98
	27.789	75.569		1.164	293.782		651.982	941.857		5.436	0.66
	14.12	106.206		0.868	7.243		346.077	114.248		6.287	0.903
	26.278	8.337		23.482	9.431		177.971	218.3		13.182	1.719
	48.197	48.631		9.344	0.382		97.817	71.331		10.49	1.112
4	45.036	74.179	4	0.174	32.374	4	179.135	61.153	4	13.582	2.119
	52.018	63.272		8.597	0.556		127.534	191.953		1.997	2.692
	18.584	58.062		9.778	3.873		215.035	46.46		7.486	1.633
	61.796	66.676		0	0.556		198.587	64.471		5.54	6.391
	24.281	0		0.208	12.731		25.757	48.301		5.401	5.61
5	58.044	236.415	5	55.265	33.903	5	96.515	540.062	5	22.422	12.522
	0.104	145.649		15.475	17.49		108.047	171.91		18.723	4.412
	129.358	62.855		10.838	43.907		65.756	95.438		3.647	0.556
	33.59	58.774		8.354	13.217		37.967	67.51		13.929	17.785
	18.08	221.392		2.206	0.434		42.986	20.738		5.957	3.456
t1	100.648	122.845	t1	64.557	9.431	t1	73.919	289.284	t1	5.419	2.987
	102.177	281.19		80.223	7.729		44.584	502.356		4.794	4.082
	90.332	210.606		3.526	2.97		73.137	36.716		1.094	4.429
	34.372	0.156		5.923	0.069		391.009	61.24		1.667	2.015
	92.867	7.607		3.491	1.077		275.545	99.189		5.436	3.578
2	28.206	145.997	2	154.959	6.583	2	259.219	363.498	2	14.259	3.178
	35.396	80.276		72.755	0.052		211.075	222.086		9.309	0.608
	67.024	112.928		98.842	0.087		127.465	229.485		11.706	0.452
	70.271	40.52		109.715	0		217.64	357.627		4.863	15.388
	105.841	28.293		16.743	8.684		254.461	465.449		0.313	0.399
3	121.907	32.148	3	63.307	151.572	3	208.8	255.329	3	39.426	11.723
	24.246	19.383		50.437	152.371		202.321	104.921		3.543	7.017
	94.847	21.675		14.138	126.596		234.209	296.109		4.359	2.432
	83.193	34.337		5.037	119.597		607.954	246.402		14.45	7.781
	119.858	0.382		0.434	27.303		291.872	71.279		2.518	4.255
4	3.977	179.621	4	3.317	39.617	4	372.494	389.046	4	8.319	48.666
	35.309	238.725		68.813	56.134		492.265	427.621		10.021	85.33
	17.907	188.792		51.392	6.079		114.109	114.004		13.773	23.725
	54.64	5.263		100.614	0.087		259.862	330.203		7.121	0.625
	31.784	25.027		20.581	60.042		109.906	212.395		10.768	0.174
5	9.014	37.897	5	85.208	4.568	5	80.484	87.396	5	25.375	10.195
	32.287	44.202		135.159	33.138		57.367	17.663		3.456	14.902
	25.027	38.887		1.494	184.884		107.075	364.731		0.938	10.716
	47.693	0.087		0.538	0.069			95.733		0.486	14.607
	45.366	0.156		92.207	5.575			414.682		0.886	4.498
t2	15.301	291.507	t2	0	23.1	t2	38.054	70.48	t2	37.515	72.894
	113.466	245.29		0.608	0		61.622	44.132		0.712	76.976
	34.875	6.061		0.226	0		114.786	52.313		18.792	50.837
	2.501	4.846		0	0.104		17.125	14.311		72.234	0
	6.148	131.98		0	0.069		14.815	32.287		1.581	63.637
2	35.969	197.441	2	14.363	19.661	2	42.691	144.885	2	6.999	3.039
	32.426	199.438		30.742	0.347		94.847	81.005		6.461	5.071
	14.902	39.217		25.67	0.243		77.601	47.207		0.643	6.808
	45.678	55.3		20.442	0.017		41.736	316.152		0.973	3.578
	2.293	202.651		0.851	0.243		106.588	125.415		3.213	1.719
3	83.888	147.959	3	76.507	250.257	3	39.912	553.279	3	4.898	4.168
	147.508	125.728		1.164	293.782		48.683	586.053		0.486	1.007
	34.215	143.409		0.868	7.243		10.977	370.063		0	0.712
	71.522	204.023		23.482	9.431		42.917	746.396		2.484	4.603
	55.769	254.322		9.344	0.382		6.027	271.36		0.33	0.382
4	88.821	74.405	4	0.174	32.374	4	52.157		4	2.379	0.035
	53.077	23.725		8.597	0.556		18.723			48.579	0
	39.773	27.615		9.778	3.873		29.022			2.866	0.156
	35.917	310.872		0	0.556		10.421	218.543		1.059	0.313
	43.455	13.026		0.208	12.731		64.245	57.992		15.909	0.156
5	70.254	80.744	5	55.265	33.903	5	53.963	248.746	5	60.302	0
	72.616	153.708		15.475	17.49		126.787	101.378		5.141	0
	42.708	87.066		10.838	43.907		50.298	139.345		0.174	0.139
	1.007	17.889		8.354	13.217		50.42	187.802		0.087	0.799
	115.081	13.043		2.206	0.434		31.384	206.038		0	0.017
t2	134.586	331.506	t2	64.557	9.431	t2	724.025	212.725	t2	38.331	7.434
	197.493	116.61		80.223	7.729		490.094	474.063		53.129	7.069
	16.5	157.529		3.526	2.97		313.86	185.144		12.071	2.379
	152.284	174.081		5.923	0.069		589.475	227.019		16.795	2.171
	123.071	181.619		3.491	1.077		372.512	760.412		11.949	0.643
2	14.676	218.682	2	154.959	6.583	2	372.859	380.38	2	2.31	0
	0.139	225.629		72.755	0.052		162.531	148.393		2.97	0.052
	132.571	273.114		98.842	0.087		153.83	195.808		1.719	0.278
	16.413	139.918		109.715	0		151.745	66.746		0.973	0.208
	23.221	136.427		16.743	8.684		398.807	233.827		1.824	0.156
3	82.342	9.309	3	63.307	151.572	3	323.777	38.227	3	76.976	40.034
	221.652	13.043		50.437	152.371		332.357	18.897		41.822	3.491
	291.177	1.025		14.138	126.596		375.76	470.433		76.507	17.299
	372.599	10.959		5.037	119.597		544.769	177.554		15.11	15.388
	501.956	1.563		0.434	27.303		311.949	142.419		16.534	0.764
4	380.571	22.249	4	3.317	39.617	4	289.11	23.76	4	0	0.295
	168.401	157.182		68.813	56.134		121.386	4.62		3.995	1.893
	44.046	73.606		51.392	6.079		341.735	99.38		1.372	0.729
	44.601	250.136		100.614	0.087		329.456	8.545		3.422	4.377
	76.489	0.017		20.581	60.042		83.94	14.746		0.973	14.016
5	27.702	158.554	5	85.208	4.568	5	748.931	69.646	5	141.55	2.414
	246.072	106.554		135.159	33.138		699.658	43.438		178.267	0.087
	0.469	57.836		1.494	184.884		455.393	64.384		118.346	0.174
	314.155	58.617		0.538	0.069		702.819			63.116	0.33
	55.543	58.704		92.207	5.575		442.801			52.66	1.633
t3	284.455	99.693	t3	14.277	5.87	t3	282.84	148.307	t3	3.89	4.151
	0.782	11.15		11.011	5.593		815.347	127.117		100.284	4.62
	158.901	9.344		29.335	4.307		434.429	204.857		9.188	5.679
	319.626	13.617		32.982	3.196		255.763	240.375		42.413	0.243
	0.104	5.731		0.382	4.95		651.218	174.949		5.923	0.382
2	83.263	41.909	2	14.068	155.063	2	292.705	147.959	2	3.057	25.444
	185.509	10.855		0.191	0.521		655.63	321.762		13.078	0.017
	130.574	81.231		0.087	3.63		391.981	100.232		3.404	7.816
	35.188	236.155		0	2.432		654.275	262.78		0.556	0.226
	156.383	208.504		22.405	1.928		750.581	17.663		3.109	0.591
3	53.65	111.677	3	9.552	83.767	3	95.421	758.744	3	2.935
	69.073	209.06		13.512	77.757		917.715	836.224		1.285
	64.801	30.342		2.379	17.594		188.618	571.533		4.811
	119.406	131.807		0.243	10.734		357.992	925.183		1.494	0.747
	2.102	176.061		2.102	3.63		254.617	741.185		1.146	2.484
4	33.937	155.393	4	31.176	15.301	4	992.52	278.151	4	34.389	68.83
	9.605	59.434		4.707	0.452		15.423	66.972		41.579	1.007
	18.758	19.209		16.673	3.422		8.632	468.123		3.369	0.608
	3.717	131.98		20.303	3.283		265.819	15.979		33.538	74.926
	222.816	3.144		25.948	1.858		15.041	541.764		2.709	0.625
5	260.314	162.93	5	37.324	5.853	5	147.647	53.98	5	25.236	0.122
	123.071	190.65		23.082	0.122		110.861	2.171		34.545	0.174
	12.679	58.27		1.459	4.707		308.076	6.999		9.24	0.069
	303.317	114.491		1.181	5.801		330.811	555.034		11.776	5.141
	53.633	196.104		0.469	1.494		250.379	83.402		26.921	0.347
t3	205.239	110.201	t3	167.099	15.423	t3	205.743	77.966	t3	117.374	59
	135.003	98.634		14.485	50.09		290.777	352.313		9.101	9.917
	262.172	52.417		14.068	0.764		287.912	303.508		3.057	14.45
	55.404	129.966		52.834	9.657		197.337	47.571		58.583	12.8
	201.001	51.896		71.522	1.476		260.783	88.734		110.566	4.134
2	1.963	61.952	2	17.889	18.653	2	310.49	229.312	2	42.986	10.004
	92.659	61.171		91.808	8.754		269.501	186.673		45.487	0.156
	248.486	43.82		78.504	10.299		123.418	394.1		34.597	1.216
	73.745	67.51		8.18	1.789		462.948	249.893		14.416	17.993
	17.941	50.142		70.254	1.164		414.004	19.748		2.97	14.172
3	49.725	50.576	3	100.179	0.729	3	386.771	373.919	3	1.233	10.074
	195.218	123.418		69.768	0.191		367.44	384.843		10.317	16.013
	42.708	37.359		4.637	0.156		268.008	127.187		12.123	2.449
	0.591	37.359		34.337	2.727		373.259	141.133		6.982	3.821
	133.821	20.79		10.039	0.191		193.151	0		2.605	1.754
4	164.997	86.146	4	9.257	6.218	4	253.054	178.614	4	29.109	14.989
	27.32	60.493		6.478	7.399		141.533	571.655		10.021	18.497
	33.59	117.304		5.124	3.317		92.624	91.461		54.241	0
	51.566	48.231		44.167	7.434		48.283	9.605		31.211	0.017
	50.958	97.366		16.257	7.625		135.593	79.598		53.841	2.814
5	212.517	48.422	5	73.033	1.824	5	315.023	10.23	5	3.752	3.369
	88.039	26.052		29.925	3.647		224.692	23.951		71.921	0
	126.214	21.554		16.691	43.368		189.278	368.118		0.139	0.035
	125.606	105.511		7.347	3.23		171.979	142.28		4.412	0.573
	108.395	13.842		31.732	3.717		49.291	125.502		3.022	1.372
Avg	85.9033	92.8056		30.6507	27.7972		250.432	228.128		19.5569	8.23839
STD	88.7523	78.905		37.8837	56.5512		204.082	204.672		28.8688	16.3739
N	150	150		150	150		148	145		150	147
