# Supplementary material for: Oxaliplatin resistance in colorectal cancer enhances TRAIL sensitivity via death receptor 4 upregulation and lipid raft localization
Source: eLife. 2021 Aug 3;10:e67750. doi: 10.7554/eLife.67750 (PMC8331188; doi:10.7554/eLife.67750)
Supplement: Figure 4—source data 1. [file elife-67750-fig4-data1.xlsx]

## Sheet: HCT116
Figure 4 (related to panel B)
HCT116
								Table Analyzed	HCT116 Dr4 coloc
	DR4 Coloc			DR4 Coloc
	Parental	OxR		Parental	OxR			Column B	OxR
t1	6.357	18.375		6.357	18.375			vs.	vs.
	21.536	9.101		21.536	9.101			Column A	Parental
	0.122	1.546		0.122	1.546
	6.096	2.067		6.096	2.067			Unpaired t test with Welch's correction
	3.995			3.995				P value	<0.0001
2	7.729	0.243		7.729	0.243			P value summary	****
	2.97	0.434		2.97	0.434			Significantly different (P < 0.05)?	Yes
	0.052	0.695		0.052	0.695			One- or two-tailed P value?	Two-tailed
	1.511	6.583		1.511	6.583			Welch-corrected t, df	t=5.195, df=79.55
	0.486	0.035		0.486	0.035
3	18.341	1.581		18.341	1.581			How big is the difference?
	4.186	1.98		4.186	1.98			Mean of column A	4.362
	8.719	6.843		8.719	6.843			Mean of column B	18.01
	7.677	0.33		7.677	0.33			Difference between means (B - A) ± SEM	13.65 ± 2.627
	6.93	1.65		6.93	1.65			95% confidence interval	8.420 to 18.88
4		20.112			20.112			R squared (eta squared)	0.2533
	22.196	10.734		22.196	10.734
	10.803	17.438		10.803	17.438			F test to compare variances
	4.672	23.308		4.672	23.308			F, DFn, Dfd	12.49, 69, 72
	2.171			2.171				P value	<0.0001
5	20.963	5.61		20.963	5.61			P value summary	****
	0	9.5		0	9.5			Significantly different (P < 0.05)?	Yes
	5.54	3.578		5.54	3.578
	3.89	2.084		3.89	2.084			Data analyzed
	0.955	48.214		0.955	48.214			Sample size, column A	73
t2	0.069	25.983		0.069	25.983			Sample size, column B	70
	6.791	63.22		6.791	63.22
	0.035	0.382		0.035	0.382
	0.052	0.573		0.052	0.573
	0	38.991		0	38.991
2	0.365	77.288		0.365	77.288
	0.261	42.708		0.261	42.708
	0	22.7		0	22.7
	0.087	37.255		0.087	37.255
	0.087	29.213		0.087	29.213
3	0.313	74.631		0.313	74.631
	0.521	72.877		0.521	72.877
	0	28.05		0	28.05
	0.104	34.319		0.104	34.319
	0.295	59.347		0.295	59.347
4	0.504	5.506		0.504	5.506
	0	1.598		0	1.598
	1.268	0.504		1.268	0.504
	0.643	12.245		0.643	12.245
	0.695	0.417		0.695	0.417
5	0.156	18.028		0.156	18.028
	0.573	4.637		0.573	4.637
	0.087	32.027		0.087	32.027
	0.452	2.084		0.452	2.084
	0.087	1.303		0.087	1.303
t3	6.444	2.605		6.444	2.605
	0	5.106		0	5.106
	2.953	0.191		2.953	0.191
	2.015	0.243		2.015	0.243
	0.017	0.122		0.017	0.122
2	13.808	5.297		13.808	5.297
	2.275	0.556		2.275	0.556
	4.238	9.778		4.238	9.778
	1.824	13.773		1.824	13.773
	5.697	14.346		5.697	14.346
3	14.85	51.34		14.85	51.34
	13.565	123.244		13.565
	8.927	3.092		8.927	3.092
	16.673	59.555		16.673	59.555
	2.814	48.666		2.814	48.666
4	1.772	14.346		1.772	14.346
	0.469	3.717		0.469	3.717
	1.702	3.96		1.702	3.96
	0.347	19.695		0.347	19.695
	54.38	45.053			45.053
5	19.157	88.543		19.157
	2.432	102.385		2.432
	0.434	9.066		0.434	9.066
	13.565	26.816		13.565	26.816
	1.077	45.487		1.077	45.487
	5.03753	21.5741		4.3616	18.0105
Avg	8.26546	26.9968		5.95358	21.0317
Std	74	73		73	70
N	0.960841	3.15973		0.696814	2.51377
SEM
	24.7964	80.9903		17.8607	63.0951
STDx3	29.8339	102.564		22.2223	81.1056
Plus mean
		4.28268
Fold Change		8.8373
Fold Change STD		1.03433
Fold Change SEM

## Sheet: SW620
Figure 4 (related to panel B)
SW620
									Table Analyzed	Sw620 Dr4 coloc
	DR4 Coloc			DR4 Coloc
	Parental	OxR		Parental	OxR				Column B	OxR
t1	0.027	1.025		0.027	1.025				vs.	vs.
	0.102	0		0.102	0				Column A	Parental
	0	0		0	0
	0.081	0.191		0.081	0.191				Unpaired t test with Welch's correction
	0	0.313		0	0.313				P value	0.0037
2	0.017	0.075		0.017	0.075				P value summary	**
	0.087	0.007		0.087	0.007				Significantly different (P < 0.05)?	Yes
	0.122	0.047		0.122	0.047				One- or two-tailed P value?	Two-tailed
	0.504	0		0.504	0				Welch-corrected t, df	t=2.994, df=76.07
	0.052			0.052
3	0.083	0.113		0.083	0.113				How big is the difference?
	0.075	0		0.075	0				Mean of column A	0.3052
		0.01			0.01				Mean of column B	1.333
		0.01			0.01				Difference between means (B - A) ± SEM	1.028 ± 0.3434
		0			0				95% confidence interval	0.3441 to 1.712
4	0.035	11.151		0.035	11.151				R squared (eta squared)	0.1054
	0	13.124		0	13.124
	0	4.039		0	4.039				F test to compare variances
	0.035	1.182		0.035	1.182				F, DFn, Dfd	28.74, 71, 69
	0.017	2.168		0.017	2.168				P value	<0.0001
5	0	0.236		0	0.236				P value summary	****
	0	0.041		0	0.041				Significantly different (P < 0.05)?	Yes
	0.017	0.175		0.017	0.175
	0.156	0.041		0.156	0.041				Data analyzed
	0.017	0		0.017	0				Sample size, column A	70
t2	0	2.206		0	2.206				Sample size, column B	72
	0	0		0	0
	0.017	0		0.017	0
	0	0		0	0
	0	0		0	0
2	0.486	0.365		0.486	0.365
	1.546	0.017		1.546	0.017
	1.65	0		1.65	0
	1.129	0		1.129	0
	0.069	0		0.069	0
3	4.412	21.345
	0.104	49.03		0.104
	0	2.067		0	2.067
	1.824	2.432		1.824	2.432
	0.608	0.191		0.608	0.191
4	0	10.334		0	10.334
	0.399	0.104		0.399	0.104
	0.226	0.764		0.226	0.764
	0	0.104		0	0.104
	0	1.772		0	1.772
5	10.855	7.295			7.295
	0.33	0.382		0.33	0.382
	0.295	5.836		0.295	5.836
	0.261	0.174		0.261	0.174
	0.052	0.139		0.052	0.139
t3	0.226	0.365		0.226	0.365
	0.174	0.538		0.174	0.538
	1.251	0.695		1.251	0.695
	0.729	0		0.729	0
	0.017	0.295		0.017	0.295
2	0	8.84		0	8.84
	0	0		0	0
	0	0.747		0	0.747
	0	0.365		0	0.365
	0.208	0.261		0.208	0.261
3	0.139	5.089		0.139	5.089
	0.486	8.354		0.486	8.354
	0	0.504		0	0.504
	0	0.486		0	0.486
	0	0		0	0
4	1.754	0.208		1.754	0.208
	0.139	0		0.139	0
	1.025	0.035		1.025	0.035
	0.087	0.191		0.087	0.191
	0.486	0		0.486	0
5	2.484	0.365		2.484	0.365
	1.372	0		1.372	0
	0.365	0.226		0.365	0.226
	0	0.278		0	0.278
	0	0.017		0	0.017
Avg	0.508778	2.24816		0.305214	1.33318
Std	1.41844	6.57131		0.530261	2.84305
N	72	74		70	72
SEM	0.167165	0.763899		0.0633783	0.335056
STDx3	4.25533	19.7139		1.59078	8.52914
Plus mean	4.76411	21.9621		1.896	9.86232
Fold Change		4.41875
Fold Change STD		17.8489
Fold Change SEM		2.07489
Fold Change SEM
