# Supplementary material for: Oxaliplatin resistance in colorectal cancer enhances TRAIL sensitivity via death receptor 4 upregulation and lipid raft localization
Source: eLife. 2021 Aug 3;10:e67750. doi: 10.7554/eLife.67750 (PMC8331188; doi:10.7554/eLife.67750)
Supplement: Figure 4—source data 2. [file elife-67750-fig4-data2.xlsx]

## Sheet: Sheet1
Figure 4 (related to panel C)									Linear regression
		X		Y					Best-fit values
		Max TRAIL sensitization	Max TRAIL sensitization (SEM)	Fold Change DR4 coloc	Fold Change DR4 coloc (SD)	N (cells)			Slope	0.06786
	SW480	0.35	1.1498	0.829556	2.44863	72			Y-intercept	0.4268
	HT29	13.87	4.86727	0.566821	1.43691	72			X-intercept	-6.289
	SW620	44.85	3.8269	4.36801	12.0148	72			1/slope	14.74
	HCT116	61.57	8.14448	4.12934	7.4177	70
									Std. Error
									Slope	0.01964
									Y-intercept	0.7603
									95% Confidence Intervals
									Slope	-0.01664 to 0.1524
									Y-intercept	-2.844 to 3.698
									X-intercept	-infinity to 24.69
									Goodness of Fit
									R squared	0.8565
									Sy.x	0.9533
									Is slope significantly non-zero?
									F	11.94
									DFn, DFd	1, 2
									P value	0.0745
									Deviation from zero?	Not Significant
									Equation	Y = 0.06786*X + 0.4268
									Data
									Number of X values	4
									Maximum number of Y replicates	1
									Total number of values	4
									Number of missing values	0
