# Supplementary material for: Oxaliplatin resistance in colorectal cancer enhances TRAIL sensitivity via death receptor 4 upregulation and lipid raft localization
Source: eLife. 2021 Aug 3;10:e67750. doi: 10.7554/eLife.67750 (PMC8331188; doi:10.7554/eLife.67750)
Supplement: Figure 4—source data 4. [file elife-67750-fig4-data4.xlsx]

## Sheet: Sheet1
Figure 4 (related to panel E)
	HCT116 Lipid Raft Sample					Table Analyzed	HCT116 DR4 Lipid Rafts			SW620 Lipid Raft Sample					Table Analyzed	SW620 DR4 Lipid Rafts
		DR4 -	BActin -	DR4/Bactin							DR4 -	BActin -	DR4/Bactin
		Flux	Flux			Column B	OXR				Flux	Flux			Column B	OXR
	Parental T1	0.648	3.85	0.168312		vs.	vs.			Parental T1	0.0613	2.13	0.0287793		vs.	vs.
	OXR T1	1.19	5.03	0.236581		Column A	Parental			OXR T1	0.222	2.67	0.0831461		Column A	Parental
	Parental T2	0.71	4.65	0.152688						Parental T2	0.11	3.09	0.0355987
	OXR T2	1.1	5.01	0.219561		Unpaired t test				OXR T2	0.255	1.75	0.145714		Unpaired t test
	Parental T3	0.5	3.52	0.142045		P value	0.0455			Parental T3	0.216	3.01	0.0717608		P value	0.0488
	OXR T3	0.894	5.47	0.163437		P value summary	*			OXR T3	0.553	2.93	0.188737		P value summary	*
						Significantly different (P < 0.05)?	Yes								Significantly different (P < 0.05)?	Yes
						One- or two-tailed P value?	One-tailed								One- or two-tailed P value?	Two-tailed
						t, df	t=2.216, df=4								t, df	t=2.800, df=4
						How big is the difference?									How big is the difference?
						Mean of column A	0.1543								Mean of column A	0.0456
						Mean of column B	0.2067								Mean of column B	0.1392
						Difference between means (B - A) ± SEM	0.05233 ± 0.02361								Difference between means (B - A) ± SEM	0.09363 ± 0.03344
						95% confidence interval	-0.01323 to 0.1179								95% confidence interval	0.0007912 to 0.1865
						R squared (eta squared)	0.5512								R squared (eta squared)	0.6622
						F test to compare variances									F test to compare variances
						F, DFn, Dfd	8.820, 2, 2								F, DFn, Dfd	5.364, 2, 2
						P value	0.2037								P value	0.3142
						P value summary	ns								P value summary	ns
						Significantly different (P < 0.05)?	No								Significantly different (P < 0.05)?	No
						Data analyzed									Data analyzed
						Sample size, column A	3								Sample size, column A	3
						Sample size, column B	3								Sample size, column B	3
