# Supplementary material for: Oxaliplatin resistance in colorectal cancer enhances TRAIL sensitivity via death receptor 4 upregulation and lipid raft localization
Source: eLife. 2021 Aug 3;10:e67750. doi: 10.7554/eLife.67750 (PMC8331188; doi:10.7554/eLife.67750)
Supplement: Figure 4—source data 5. [file elife-67750-fig4-data5.xlsx]

## Sheet: Sheet1
Figure 4 (related to panel F)
Median	SW620 P			Sw620 OxR				Table Analyzed	SW620 FRET
	1	2	3	1	2	3
Background	9.8	20.2	9.72	10.3	20.4	6.61		Column B	OxR
DR4 (donor) only	31.1	50.6	32.2	38.8	60.2	37.1		vs.	vs.
Donor plus acceptor t1	30.7	50.3	32	34.3	56.9	34.7		Column A	Parental
Donor plus acceptor t2	30.1	50.3	31.6	33.5	58.1	30.9
Donor plus acceptor t3	30.1	49.7	30.4	31.9	56.5	25.1		Unpaired t test
								P value	0.002
FRET Eff	0.0187793	0.00986842	0.0088968	0.157895	0.0829146	0.0787143		P value summary	**
	0.0469484	0.00986842	0.0266904	0.185965	0.0527638	0.203345		Significantly different (P < 0.05)?	Yes
	0.0469484	0.0296053	0.0800712	0.242105	0.0929648	0.393572		One- or two-tailed P value?	Two-tailed
	0.0375587	0.0164474	0.0385528	0.195322	0.0762144	0.22521		t, df	t=3.679, df=16
								How big is the difference?
								Mean of column A	3.086
								Mean of column B	16.56
								Difference between means (B - A) ± SEM	13.47 ± 3.663
								95% confidence interval	5.709 to 21.24
								R squared (eta squared)	0.4582
								F test to compare variances
								F, DFn, Dfd	20.63, 8, 8
								P value	0.0003
								P value summary	***
								Significantly different (P < 0.05)?	Yes
								Data analyzed
								Sample size, column A	9
								Sample size, column B	9
Median	HCT116 P			HCT116 OxR				Table Analyzed	HCT116 FRET
	1	2	3	1	2	3
Background	15.9	15.5	18.4	14.9	15.2	14.6		Column B	OxR
DR4 (donor) only	71.7	67.8	63.2	72.3	74.4	72.1		vs.	vs.
Donor plus acceptor t1	71.5	66.5	59.2	59.4	64.4	66.6		Column A	Parental
Donor plus acceptor t2	67.8	62.3	56.9	60.1	63	64.8
Donor plus acceptor t3	65	63.5	57.1	58.6	60.9	63.9		Unpaired t test
								P value	0.0008
FRET Eff	0.00358423	0.0248566	0.0892857	0.224739	0.168919	0.0956522		P value summary	***
	0.0698925	0.105163	0.140625	0.212544	0.192568	0.126957		Significantly different (P < 0.05)?	Yes
	0.120072	0.082218	0.136161	0.238676	0.228041	0.142609		One- or two-tailed P value?	Two-tailed
	0.0645161	0.0707457	0.122024	0.225319	0.196509	0.121739		t, df	t=4.141, df=16
								How big is the difference?
								Mean of column A	8.578
								Mean of column B	18.12
								Difference between means (B - A) ± SEM	9.541 ± 2.304
								95% confidence interval	4.656 to 14.43
								R squared (eta squared)	0.5173
								F test to compare variances
								F, DFn, Dfd	1.143, 8, 8
								P value	0.8549
								P value summary	ns
								Significantly different (P < 0.05)?	No
								Data analyzed
								Sample size, column A	9
								Sample size, column B	9
