# Supplementary material for: Oxaliplatin resistance in colorectal cancer enhances TRAIL sensitivity via death receptor 4 upregulation and lipid raft localization
Source: eLife. 2021 Aug 3;10:e67750. doi: 10.7554/eLife.67750 (PMC8331188; doi:10.7554/eLife.67750)
Supplement: Figure 5—figure supplement 1—source data 1. [file elife-67750-fig5-figsupp1-data1.xlsx]

## Sheet: Resveratrol DR5 coloc
Figure 5- figure supplement 1
	HCT116										SW620
	data			cleaned			Table Analyzed	DR5 HCT 116 Par vs Resveratrol			data			cleaned			Table Analyzed	DR5 SW620 Par vs Resveratrol
	DR5 Coloc			DR5 Coloc							DR5 Coloc			DR5 Coloc
	Parental	Resveratrol		Parental	Resveratrol		Column B	Resveratrol			Parental	Resveratrol		Parental	Resveratrol		Column B	Resveratrol
	0.069	0.035		0.069	0.035		vs.	vs.			0.087	0.278		0.087	0.278		vs.	vs.
	0	0.017		0	0.017		Column A	Control			0.208	0.399		0.208	0.399		Column A	Control
	0.017	0.017		0.017	0.017						0	0		0	0
	0.069	0.069		0.069	0.069		Unpaired t test with Welch's correction				0.052	1.181		0.052	1.181		Unpaired t test with Welch's correction
	0	0		0	0		P value	0.0604			0.122	0.174		0.122	0.174		P value	0.5844
	0.017	0		0.017	0		P value summary	ns			0.017	1.112		0.017	1.112		P value summary	ns
	0	0.104		0	0.104		Significantly different (P < 0.05)?	No			0.139	0		0.139	0		Significantly different (P < 0.05)?	No
	0	0.434		0	0.434		One- or two-tailed P value?	Two-tailed			0.208	0.122		0.208	0.122		One- or two-tailed P value?	Two-tailed
	0.191	1.936		0.191			Welch-corrected t, df	t=1.923, df=48.05			1.112	2.744		1.112	2.744		Welch-corrected t, df	t=0.5494, df=75.60
	0.052	0.521		0.052	0.521						1.337	0.139		1.337	0.139
	0	0.087		0	0.087		How big is the difference?				0.921	2.015		0.921	2.015		How big is the difference?
	0.035	0.208		0.035	0.208		Mean of column A	0.07465			1.025	2.814		1.025	2.814		Mean of column A	0.5393
	0	0.104		0	0.104		Mean of column B	0.1791			0.469	0.017		0.469	0.017		Mean of column B	0.4484
	0.052	0.052		0.052	0.052		Difference between means (B - A) ± SEM	0.1044 ± 0.05431			0.069	1.424		0.069	1.424		Difference between means (B - A) ± SEM	-0.09092 ± 0.1655
	0	1.633		0	1.633		95% confidence interval	-0.004758 to 0.2136			0.261	0.069		0.261	0.069		95% confidence interval	-0.4206 to 0.2387
	0	2.605		0			R squared (eta squared)	0.07145			0	2.067		0	2.067		R squared (eta squared)	0.003976
	0.035	0.087		0.035	0.087						0	0.035		0	0.035
	0	0.139		0	0.139		F test to compare variances				0.122	0.052		0.122	0.052		F test to compare variances
	0.226	0.052		0.226	0.052		F, DFn, Dfd	6.247, 37, 39			0.087	0.017		0.087	0.017		F, DFn, Dfd	1.158, 38, 38
	0.052	0.486		0.052	0.486		P value	<0.0001			0.069	0.052		0.069	0.052		P value	0.6538
	0	0		0	0		P value summary	****			0.069	0.017		0.069	0.017		P value summary	ns
	0.417	0.226		0.417	0.226		Significantly different (P < 0.05)?	Yes			0.122	0.087		0.122	0.087		Significantly different (P < 0.05)?	No
	0.643	0.938		0.643	0.938						0.139	0.052		0.139	0.052
	0.035	0		0.035	0		Data analyzed				0.104	0.035		0.104	0.035		Data analyzed
	0.017	0.017		0.017	0.017		Sample size, column A	40			1.129	0.608		1.129	0.608		Sample size, column A	39
	0.174	0.226		0.174	0.226		Sample size, column B	38			0.191	0.035		0.191	0.035		Sample size, column B	39
	0	0		0	0						0.382	0.052		0.382	0.052
	0.139	0		0.139	0						1.754	0.469		1.754	0.469
	0	0		0	0						0.921	0.156		0.921	0.156
	0	0.069		0	0.069						0.469	0.017		0.469	0.017
	0	0.104		0	0.104						0.122	0.104		0.122	0.104
	0	0.017		0	0.017						0.156	0.017		0.156	0.017
	0.087	0.035		0.087	0.035						3.734	0.139			0.139
	0.087	0		0.087	0						1.407	0.278		1.407	0.278
	0.069	0		0.069	0						0.886	0.104		0.886	0.104
	0.052	0.191		0.052	0.191						0.556	0.191		0.556	0.191
	0.069	0.104		0.069	0.104						1.303	0.278		1.303	0.278
	0.191	0.399		0.191	0.399						0.486	0.069		0.486	0.069
	0.122	0.365		0.122	0.365						3.647	0.069		3.647	0.069
	0.069	0.069		0.069	0.069						0.886			0.886
Avg	0.07465	0.28365		0.07465	0.179079					Avg	0.6192	0.44841		0.539333	0.44841
Std	0.123213	0.550765		0.123213	0.307761					Std	0.848011	0.747352		0.69456	0.747352
N	40	40		40	38					N	40	39		39	39
SEM	0.0194816	0.0870836		0.0194816	0.0499254					SEM	0.134082	0.119672		0.111219	0.119672
STDx3	0.369638	1.6523		0.369638	0.923283					STDx3	2.54403	2.24205		2.08368	2.24205
Plus mean	0.444288	1.93595		0.444288	1.10236					Plus mean	3.16323	2.69047		2.62301	2.69047

## Sheet: Nystatin DR5 coloc
Figure 5- figure supplement 1
	HCT116										SW620
	data			cleaned			Table Analyzed	DR5 HCT 116 OxR vs Nystatin			data			cleaned			Table Analyzed	DR5 SW620 OxR vs Nystatin
	DR5 Coloc			DR5 Coloc							DR5 Coloc			DR5 Coloc
	OxR Cont	Nystatin		OxR Cont	Nystatin		Column B	Nystatin			OxR Cont	Nystatin		OxR Cont	Nystatin		Column B	Nystatin
	0.104	0.052		0.104	0.052		vs.	vs.			0.243	2.692		0.243	2.692		vs.	vs.
	0.122	0.695		0.122	0.695		Column A	Control			0.017	0.191		0.017	0.191		Column A	Control
	0.139	1.737		0.139	1.737						0.347	0.069		0.347	0.069
	0.156	0.556		0.156	0.556		Unpaired t test with Welch's correction				0	0.069		0	0.069		Unpaired t test with Welch's correction
	0	0.851		0	0.851		P value	0.5418			0.191	0		0.191	0		P value	0.0118
	0	0.122		0	0.122		P value summary	ns			0	2.275		0	2.275		P value summary	*
	0	0.174		0	0.174		Significantly different (P < 0.05)?	No			0.017	0.243		0.017	0.243		Significantly different (P < 0.05)?	Yes
	0.521	0.243		0.521	0.243		One- or two-tailed P value?	Two-tailed			0.174	0		0.174	0		One- or two-tailed P value?	Two-tailed
	1.129	0.069		1.129	0.069		Welch-corrected t, df	t=0.6129, df=75.01			0.729	0.434		0.729	0.434		Welch-corrected t, df	t=2.611, df=51.15
	0.278	0.573		0.278	0.573						3.491	0.226			0.226
	0.747	0.313		0.747	0.313		How big is the difference?				2.188	0.677		2.188	0.677		How big is the difference?
	1.129	0.035		1.129	0.035		Mean of column A	0.4404			0.278	19.331		0.278			Mean of column A	0.4074
	0.504	0.122		0.504	0.122		Mean of column B	0.375			0	0.347		0	0.347		Mean of column B	0.9997
	0.122	0.052		0.122	0.052		Difference between means (B - A) ± SEM	-0.06544 ± 0.1068			1.164	0.921		1.164	0.921		Difference between means (B - A) ± SEM	0.5923 ± 0.2268
	0.66	0.122		0.66	0.122		95% confidence interval	-0.2781 to 0.1472			0.295	0.156		0.295	0.156		95% confidence interval	0.1370 to 1.048
	0.591	0.573		0.591	0.573		R squared (eta squared)	0.004984			0.017	0.33		0.017	0.33		R squared (eta squared)	0.1176
	0.347	0		0.347	0						1.059	0.903		1.059	0.903
	2.814	0.278			0.278		F test to compare variances				0.365	0.33		0.365	0.33		F test to compare variances
	0.208	0		0.208	0		F, DFn, Dfd	1.259, 38, 38			0.434	0.903		0.434	0.903		F, DFn, Dfd	5.601, 38, 38
	0.122	0.33		0.122	0.33		P value	0.4808			0.208	0.712		0.208	0.712		P value	<0.0001
	0.313	0.035		0.313	0.035		P value summary	ns			0.261	2.466		0.261	2.466		P value summary	****
	0.208	0.261		0.208	0.261		Significantly different (P < 0.05)?	No			0.278	1.685		0.278	1.685		Significantly different (P < 0.05)?	Yes
	0.017	0.035		0.017	0.035						0.191	0.712		0.191	0.712
	0.903	0.747		0.903	0.747		Data analyzed				2.24	0.33		2.24	0.33		Data analyzed
	0.313	2.102		0.313			Sample size, column A	39			0.538	2.744		0.538	2.744		Sample size, column A	39
	0.104	1.528		0.104	1.528		Sample size, column B	39			0	4.828		0	4.828		Sample size, column B	39
	1.702	0.399		1.702	0.399						0.087	0		0.087	0
	0.538	0.886		0.538	0.886						0.069	0.99		0.069	0.99
	1.407	0.017		1.407	0.017						0.156	0.035		0.156	0.035
	0.625	1.285		0.625	1.285						0.087	0.191		0.087	0.191
	0.104	0.625		0.104	0.625						0	0.052		0	0.052
	0.382	1.824		0.382	1.824						0.069	0.087		0.069	0.087
	1.442	0.035		1.442	0.035						0.208	3.491		0.208	3.491
	0.035	0.017		0.035	0.017						0.261	4.846		0.261	4.846
	0.087	0		0.087	0						0.417	0.538		0.417	0.538
	0.747	0		0.747	0						0.434	2.588		0.434	2.588
	0.052	0.017		0.052	0.017						0.069	0.017		0.069	0.017
	0.243	0		0.243	0						0.208	1.737		0.208	1.737
	0.208	0		0.208	0						1.146	0.156		1.146	0.156
	0.868	0.017		0.868	0.017						1.442	0.017		1.442	0.017
Avg	0.499775	0.418175		0.440436	0.375					Avg	0.48445	1.45798		0.407359	0.999692
Std	0.569405	0.555024		0.437825	0.491312					Std	0.72151	3.13184		0.544246	1.28803
N	40	40		39	39					N	40	40		39	39
SEM	0.0900309	0.087757		0.0701081	0.0786729					SEM	0.114081	0.495188		0.0871491	0.206249
STDx3	1.70822	1.66507		1.31347	1.47394					STDx3	2.16453	9.39552		1.63274	3.86408
Plus mean	2.20799	2.08325		1.75391	1.84894					Plus mean	2.64898	10.8535		2.0401	4.86377
