# Supplementary material for: Oxaliplatin resistance in colorectal cancer enhances TRAIL sensitivity via death receptor 4 upregulation and lipid raft localization
Source: eLife. 2021 Aug 3;10:e67750. doi: 10.7554/eLife.67750 (PMC8331188; doi:10.7554/eLife.67750)
Supplement: Figure 5—source data 1. [file elife-67750-fig5-data1.xlsx]

## Sheet: Nystatin cell viability
Figure 5 (related to panel A and G)
620 OXR	t1							620 OXR	t2							620 OXR	t3
0	86.1	84.8	86.6	85.8333				0	90.4	89.3	85.7	88.4667				0	89.7	90.8	86.2	88.9
0.1	91.1	86.9	89.5	89.1667				0.1	87.5	87.7	87.3	87.5				0.1	88.3	88.1	88.3	88.2333
1	86.3	85.5	85.6	85.8				1	78.4	77.5	64.8	73.5667				1	81.3	79.4	80.7	80.4667
10	77.9	81.1	83.2	80.7333				10	51	55.6	52.3	52.9667				10	50.5	55.9	54.2	53.5333
50	73.2	52.3	74.4	66.6333				50	44.4	46.1	47.5	46				50	41.9	42.9	41.6	42.1333
200	61.8	72.3	68.6	67.5667				200	47.9	51	49.2	49.3667				200	38.2	38.7	45.3	40.7333
1000	54	49	68	57				1000	45.9	50.8	49.2	48.6333				1000	48.1	49.8	45.6	47.8333
				Avg	Std							Avg	Std							Avg	Std
0	1.00311	0.987961	1.00893	1	0.00883868			0	1.0532	1.04039	0.998447	1.03068	0.023385			0	1.04505	1.05786	1.00427	1.03573	0.02285
0.1	1.06136	1.01243	1.04272	1.03883	0.0201643			0.1	1.01942	1.02175	1.01709	1.01942	0.00190252			0.1	1.02874	1.02641	1.02874	1.02796	0.00109842
1	1.00544	0.996117	0.997282	0.999612	0.00414644			1	0.913398	0.902913	0.754951	0.857087	0.0723478			1	0.947184	0.925049	0.940194	0.937476	0.00923913
10	0.907573	0.944854	0.96932	0.940583	0.0253887			10	0.594175	0.647767	0.60932	0.617087	0.0225577			10	0.58835	0.651262	0.631456	0.623689	0.0262646
50	0.852816	0.60932	0.866796	0.776311	0.118218			50	0.517282	0.537087	0.553398	0.535922	0.0147675			50	0.488155	0.499806	0.48466	0.490874	0.00647508
200	0.72	0.84233	0.799223	0.787184	0.0506614			200	0.558058	0.594175	0.573204	0.575146	0.0148083			200	0.445049	0.450874	0.527767	0.474563	0.0376959
1000	0.629126	0.570874	0.792233	0.664078	0.0936881			1000	0.534757	0.591845	0.573204	0.566602	0.0237688			1000	0.560388	0.580194	0.531262	0.557282	0.0200969
HCT116 OxR								HCT116 OxR								HCT116 OxR
0	86.6	85.8	79.5	83.9667				0	73.4	79.6	77.3	76.7667				0	83.6	85.1	82.1	83.6
0.1	83.5	81.6	75.4	80.1667				0.1	77.9	78.6	78.7	78.4				0.1	80.5	73.2	82.1	78.6
1	75.8	76.6	75.5	75.9667				1	66	65.8	64.2	65.3333				1	71.4	70.3	67.7	69.8
10	58.8	58.6	56.5	57.9667				10	28.8	30.1	28.9	29.2667				10	32.1	35.6	36.4	34.7
50	47.6	45.4	43.3	45.4333				50	15.9	15.7	14.6	15.4				50	18.6	20.3	17.7	18.8667
200	39.3	40.7	38.5	39.5				200	12.4	14.5	14.6	13.8333				200	14.5	16.5	19.5	16.8333
1000	34.6	34.2	33.1	33.9667				1000	15.2	15.1	14.4	14.9				1000	18.5	17.9	17.9	18.1
				Avg	Std							Avg	Std							Avg	Std
0	1.00893	0.999612	0.926214	0.978252	0.0369932			0	0.956144	1.03691	1.00695	1	0.0333358			0	1	1.01794	0.982057	1	0.0146501
0.1	0.972816	0.95068	0.878447	0.933981	0.0402949			0.1	1.01476	1.02388	1.02518	1.02128	0.00463616			0.1	0.962919	0.875598	0.982057	0.940191	0.0463378
1	0.883107	0.892427	0.879612	0.885049	0.00540908			1	0.859748	0.857143	0.8363	0.851064	0.0104933			1	0.854067	0.840909	0.809809	0.834928	0.0185567
10	0.685049	0.682718	0.658252	0.67534	0.01212			10	0.375163	0.392097	0.376465	0.381242	0.00769433			10	0.383971	0.425837	0.435407	0.415072	0.0223357
50	0.554563	0.528932	0.504466	0.52932	0.0204539			50	0.207121	0.204516	0.190187	0.200608	0.00744526			50	0.222488	0.242823	0.211722	0.225678	0.0128955
200	0.457864	0.474175	0.448544	0.460194	0.0105928			200	0.161528	0.188884	0.190187	0.1802	0.0132133			200	0.173445	0.197368	0.233254	0.201356	0.024579
1000	0.403107	0.398447	0.385631	0.395728	0.00738885			1000	0.198003	0.1967	0.187581	0.194095	0.00463616			1000	0.221292	0.214115	0.214115	0.216507	0.00338329

## Sheet: Resveratrol cell viabilty
Figure 5 (related to panel D and J)
620	t1						620	t2						620	t3
0	88.1	89	83.4	86.8333			0	88.8	87.7	89.9	88.8			0	73.9	78.1	77.8	76.6
0.1	81.1	85	82.6	82.9			0.1	80.2	81.6	79.8	80.5333			0.1	80.2	80.7	79.4	80.1
1	68.1	65.8	65.9	66.6			1	67.3	64.4	60.1	63.9333			1	71.4	68	66.4	68.6
10	23.2	28.8	27.5	26.5			10	19.7	26	30.7	25.4667			10	36.4	35.5	36.7	36.2
50	23.5	21.6	21.8	22.3			50	12.4	12.7	11	12.0333			50	27.5	27.8	29.1	28.1333
200	19.5	20.2	19.6	19.7667			200	14.9	19.8	15.4	16.7			200	22.4	31.2	29.1	27.5667
1000	18.2	20.3	20.2	19.5667			1000	22.8	22	23.5	22.7667			1000	32.9	29.2	30.5	30.8667
									.
				Avg	Std						Avg	Std						Avg	Std
0	101.459	102.495	96.0461	100	2.82769		0	100	98.7613	101.239	100	1.01143		0	96.4752	101.958	101.567	100	2.49754
0.1	93.3973	97.8887	95.1248	95.4702	1.84979		0.1	90.3153	91.8919	89.8649	90.6907	0.869057		0.1	104.7	105.352	103.655	104.569	0.698972
1	78.4261	75.7774	75.8925	76.6987	1.22239		1	75.7883	72.5225	67.6802	71.997	3.33091		1	93.2115	88.7728	86.6841	89.5561	2.72176
10	26.7179	33.167	31.6699	30.5182	2.75591		10	22.1847	29.2793	34.5721	28.6787	5.07493		10	47.5196	46.3446	47.9112	47.2585	0.665668
50	27.0633	24.8752	25.1056	25.6814	0.981705		50	13.964	14.3018	12.3874	13.5511	0.834313		50	35.9008	36.2924	37.9896	36.7276	0.906556
200	22.4568	23.263	22.572	22.7639	0.355993		200	16.7793	22.2973	17.3423	18.8063	2.47918		200	29.2428	40.7311	37.9896	35.9878	4.89899
1000	20.9597	23.3781	23.263	22.5336	1.11391		1000	25.6757	24.7748	26.464	25.6381	0.690119		1000	42.9504	38.1201	39.8172	40.2959	2.00079
HCT116	t1						HCT116	t2						HCT116	t3
0	91.9	85.3	60.3	79.1667			0	71.2	70.3	70.5	70.6667			0	55.5	57.2	53.9	55.5333
0.1	45.4	51.7	48.4	48.5			0.1	64.8	66.9	63.3	65			0.1	60.9	48.5	54.4	54.6
1	24.8	25.8	34.9	28.5			1	54.8	55.2	56.6	55.5333			1	47.1	45.8	47.7	46.8667
10	4.92	5.31	4.65	4.96			10	22.6	23	21.8	22.4667			10	8.4	8.15	10.8	9.11667
50	5.17	4.69	4.9	4.92			50	9.78	10.3	10.4	10.16			50	2.89	3.48	3.39	3.25333
200	3.21	5	3.21	3.80667			200	7.38	7.75	7.36	7.49667			200	2.52	2.53	2.86	2.63667
1000	3.75	3.67	3.49	3.63667			1000	7.16	6.5	6.72	6.79333			1000	3.99	3.73	4.33	4.01667
				Avg	Std						Avg	Std						Avg	Std
0	1.16084	1.07747	0.761684	1	0.171917		0	1.00755	0.994811	0.997642	1	0.0054603		0	0.9994	1.03001	0.970588	1	0.0242634
0.1	0.573474	0.653053	0.611368	0.612632	0.0325002		0.1	0.916981	0.946698	0.895755	0.919811	0.0208936		0.1	1.09664	0.873349	0.979592	0.983193	0.091193
1	0.313263	0.325895	0.440842	0.36	0.0573961		1	0.775472	0.781132	0.800943	0.785849	0.0109206		1	0.848139	0.82473	0.858944	0.843938	0.0142802
10	0.0621474	0.0670737	0.0587368	0.0626526	0.0034222		10	0.319811	0.325472	0.308491	0.317925	0.00705973		10	0.151261	0.146759	0.194478	0.164166	0.0215126
50	0.0653053	0.0592421	0.0618947	0.0621474	0.00248171		50	0.138396	0.145755	0.14717	0.143774	0.003846		50	0.0520408	0.0626651	0.0610444	0.0585834	0.0046734
200	0.0405474	0.0631579	0.0405474	0.0480842	0.0106587		200	0.104434	0.10967	0.104151	0.106085	0.00253754		200	0.0453782	0.0455582	0.0515006	0.047479	0.00284466
1000	0.0473684	0.0463579	0.0440842	0.0459368	0.00137343		1000	0.101321	0.0919811	0.0950943	0.0961321	0.00388285		1000	0.0718487	0.0671669	0.0779712	0.0723289	0.0044239
