# Supplementary material for: Oxaliplatin resistance in colorectal cancer enhances TRAIL sensitivity via death receptor 4 upregulation and lipid raft localization
Source: eLife. 2021 Aug 3;10:e67750. doi: 10.7554/eLife.67750 (PMC8331188; doi:10.7554/eLife.67750)
Supplement: Figure 5—source data 2. [file elife-67750-fig5-data2.xlsx]

## Sheet: TRAIL Sensitization
Figure 5 (related to panel B E H K)
SW620										Avg	Std		SW620 OXR with 5uM nystatin									Avg	Dev	% TRAIL Sensitization	SDNUm	TRAIL Sensitization SD
0	99.9	102.2	97.9	100.6	98.7	100.7	99.2	102.3	98.5	100	1.48997		100.311	98.7961	100.893	105.32	104.039	99.8447	104.505	105.786	100.427	102.214	2.51319	-2.21359	2.92167	2.92185
0.1	97.1	102.2	101.8	98	99.6	100.2	100.9	107.7	104.1	101.289	3.03038		106.136	101.243	104.272	101.942	102.175	101.709	102.874	102.641	102.874	102.874	1.41521	-1.56473	3.34455	3.30233
1	99.9	101.1	99.4	95.8	95.4	97.7	103.6	102.8	99.3	99.4444	2.67046		100.544	99.6117	99.7282	91.3398	90.2913	75.4951	94.7184	92.5049	94.0194	93.1392	7.19927	6.34051	7.6786	7.72337
10	79.3	82.2	81.2	80.3	80	84	92	93	91.9	84.8778	5.40921		90.7573	94.4854	96.932	59.4175	64.7767	60.932	58.835	65.1262	63.1456	72.712	15.2986	14.3333	16.2268	19.1396
50	72	73.3	72.1	74.1	77.2	78.8	86.3	84.5	84.8	78.1222	5.44299		85.2816	60.932	86.6796	51.7282	53.7087	55.3398	48.8155	49.9806	48.466	60.1036	14.2983	23.0647	15.2992	19.6495
200	68	72.1	68.3	63.6	69.9	73.6	82.5	83.6	81.7	73.7	6.83228		72	84.233	79.9223	55.8058	59.4175	57.3204	44.5049	45.0874	52.7767	61.2298	13.5577	16.9203	15.1819	20.6593
1000	66	67.3	69.9	73.3	71.2	74.6	80.3	81	79.9	73.7222	5.34577		62.9126	57.0874	79.2233	53.4757	59.1845	57.3204	56.0388	58.0194	53.1262	59.5987	7.47088	19.1577	9.18648	12.5381
SW620													Parental SW620 with 70 uM Resveratrol
0	99.9	102.2	97.9	100.6	98.7	100.7	99.2	102.3	98.6	100.011	1.47907		101.459	102.495	96.0461	100	98.7613	101.239	96.4752	101.958	101.567	100	2.25511	0.0111099	2.69688	2.69658
0.1	97.1	102.2	101.8	98	99.6	100.2	100.9	107.7	104.1	101.289	3.03038		93.3973	97.8887	95.1248	90.3153	91.8919	89.8649	104.7	105.352	103.655	96.91	5.89015	4.32313	6.62397	6.54096
1	99.9	101.1	99.4	95.8	95.4	97.7	103.6	102.8	99.3	99.4444	2.67046		78.4261	75.7774	75.8925	75.7883	72.5225	67.6802	93.2115	88.7728	86.6841	79.4173	7.85801	20.1391	8.29938	8.36325
10	79.3	82.2	81.2	80.3	80	84	92	93	91.9	84.8778	5.40921		26.7179	33.167	31.6699	22.1847	29.2793	34.5721	47.5196	46.3446	47.9112	35.4851	9.00746	58.1927	10.5068	12.9224
50	72	73.3	72.1	74.1	77.2	78.8	86.3	84.5	84.8	78.1222	5.44299		27.0633	24.8752	25.1056	13.964	14.3018	12.3874	35.9008	36.2924	37.9896	25.32	9.50883	67.5892	10.9565	14.7943
200	68	72.1	68.3	63.6	69.9	73.6	82.5	83.6	81.7	73.7	6.83228		22.4568	23.263	22.572	16.7793	22.2973	17.3423	29.2428	40.7311	37.9896	25.8527	8.00387	64.9217	10.5234	15.4953
1000	66	67.3	69.9	73.3	71.2	74.6	80.3	81	79.9	73.7222	5.34577		20.9597	23.3781	23.263	25.6757	24.7748	26.464	42.9504	38.1201	39.8172	29.4892	7.868	59.9996	9.51224	13.6166
HCT116													HCT116 Parental with 70uM Resveratrol
0	98.25	102.78	98.98	100.66	99.17	100.17	102.04	99.34	98.62	100.001	1.47144		100.04	99.0463	98.947	100.755	99.4811	99.7642	99.94	103.001	97.0588	99.7814	1.49614	0.219666	2.09847	2.09845
0.1	91.08	95.76	97.51	94.32	94.57	99.42	89.8	90.51	90.37	93.7044	3.26528		94.9732	98.6489	81.1643	91.6981	94.6698	89.5755	109.664	87.3349	97.9592	93.9653	7.58714	-0.278392	8.25995	8.8149
1	88.45	92.54	96.78	89.48	84.51	88.11	82.12	77.99	80.98	86.7733	5.60553		83.3499	74.1109	45.599	77.5472	78.1132	80.0943	84.8139	82.473	85.8944	76.8884	11.6228	11.3916	12.904	14.8891
10	53.51	52.49	51.61	44.37	43	45.98	29.74	25.47	17.08	40.3611	12.3725		23.3459	27.5184	28.6112	31.9811	32.5472	30.8491	15.1261	14.6759	19.4478	24.9003	6.64033	38.3063	14.0418	36.7188
50	39.18	34.94	44.15	20.51	17.27	20.38	17.36	16.51	17.22	25.28	10.3179		12.7161	11.6233	10.6298	13.8396	14.5755	14.717	5.20408	6.26651	6.10444	10.6307	3.60357	57.9482	10.9291	49.2787
200	22.66	23.1	27.34	16.78	18.64	16.9	15.51	17.22	15.94	19.3433	3.84246		8.54361	7.94755	8.44427	10.4434	10.967	10.4151	4.53782	4.55582	5.15006	7.8894	2.42585	59.2139	4.54414	26.2723
1000	20.03	16.96	20.03	19.64	18.52	18.64	16.51	16.79	30.46	19.7311	4.00913		8.64296	8.14623	6.65607	10.1321	9.19811	9.50943	7.18487	6.71669	7.79712	8.2204	1.17454	58.3379	4.17764	24.2651
HCT116													HCt116 OXR with 5uM Nystatin
0	98.25	102.78	98.98	100.66	99.17	100.17	102.04	99.34	98.62	100.001	1.47144		100.893	99.9612	92.6214	95.6144	103.691	100.695	100	101.794	98.2057	99.2751	3.16739	0.726022	3.49249	3.49247
0.1	91.08	95.76	97.51	94.32	94.57	99.42	89.8	90.51	90.37	93.7044	3.26528		97.2816	95.068	87.8447	101.476	102.388	102.518	96.2919	87.5598	98.2057	96.515	5.33449	-2.99933	6.2545	6.67553
1	88.45	92.54	96.78	89.48	84.51	88.11	82.12	77.99	80.98	86.7733	5.60553		88.3107	89.2427	87.9612	85.9748	85.7143	83.63	85.4067	84.0909	80.9809	85.7014	2.44461	1.23538	6.1154	7.04801
10	53.51	52.49	51.61	44.37	43	45.98	29.74	25.47	17.08	40.3611	12.3725		68.5049	68.2718	65.8252	37.5163	39.2097	37.6465	38.3971	42.5837	43.5407	49.0551	13.2284	-21.5405	18.1127	45.3599
50	39.18	34.94	44.15	20.51	17.27	20.38	17.36	16.51	17.22	25.28	10.3179		55.4563	52.8932	50.4466	20.7121	20.4516	19.0187	22.2488	24.2823	21.1722	31.8535	15.0111	-26.0029	18.2151	72.831
200	22.66	23.1	27.34	16.78	18.64	16.9	15.51	17.22	15.94	19.3433	3.84246		45.7864	47.4175	44.8544	16.1528	18.8884	19.0187	17.3445	19.7368	23.3254	28.0583	12.8459	-45.0542	13.4082	69.8925
1000	20.03	16.96	20.03	19.64	18.52	18.64	16.51	16.79	30.46	19.7311	4.00913		40.3107	39.8447	38.5631	19.8003	19.67	18.7581	22.1292	21.4115	21.4115	26.8777	9.03949	-36.2197	9.88866	50.6545

## Sheet: Statistics
		SW620 OxR			SW620			HCT116 OxR			HCT116
	Table Analyzed	Max Nystatin pretreat TRAIL Sensization		Table Analyzed	Max Resveratrol TRAIL Sensization		Table Analyzed	HCT116 OxR Max Nystatin TRAIL Sensization		Table Analyzed	HCT116 Max Resveratrol TRAIL Sensization
	Column B	Nystatin		Column B	Resveratrol		Column B	Nystatin		Column B	Resveratrol
	vs.	vs.		vs.	vs.		vs.	vs.		vs.	vs.
	Column A	Control		Column A	Control		Column A	Control		Column A	Control
	Unpaired t test			Unpaired t test			Unpaired t test			Unpaired t test
	P value	0.0111		P value	<0.0001		P value	<0.0001		P value	<0.0001
	P value summary	*		P value summary	****		P value summary	****		P value summary	****
	Significantly different (P < 0.05)?	Yes		Significantly different (P < 0.05)?	Yes		Significantly different (P < 0.05)?	Yes		Significantly different (P < 0.05)?	Yes
	One- or two-tailed P value?	Two-tailed		One- or two-tailed P value?	Two-tailed		One- or two-tailed P value?	Two-tailed		One- or two-tailed P value?	Two-tailed
	t, df	t=2.872, df=16		t, df	t=12.68, df=16		t, df	t=7.127, df=16		t, df	t=6.578, df=16
	How big is the difference?			How big is the difference?			How big is the difference?			How big is the difference?
	Mean of column A	44.85		Mean of column A	1		Mean of column A	61.57		Mean of column A	1
	Mean of column B	23.06		Mean of column B	67.59		Mean of column B	1.24		Mean of column B	59.21
	Difference between means (B - A) ± SEM	-21.79 ± 7.586		Difference between means (B - A) ± SEM	66.59 ± 5.253		Difference between means (B - A) ± SEM	-60.33 ± 8.465		Difference between means (B - A) ± SEM	58.21 ± 8.850
	95% confidence interval	-37.87 to -5.709		95% confidence interval	55.45 to 77.73		95% confidence interval	-78.28 to -42.38		95% confidence interval	39.45 to 76.97
	R squared (eta squared)	0.3402		R squared (eta squared)	0.9094		R squared (eta squared)	0.7605		R squared (eta squared)	0.73
	F test to compare variances			F test to compare variances			F test to compare variances			F test to compare variances
	F, DFn, Dfd	2.929, 8, 8		F, DFn, Dfd	7.383, 8, 8		F, DFn, Dfd	12.01, 8, 8		F, DFn, Dfd	46.80, 8, 8
	P value	0.1496		P value	0.0105		P value	0.002		P value	<0.0001
	P value summary	ns		P value summary	*		P value summary	**		P value summary	****
	Significantly different (P < 0.05)?	No		Significantly different (P < 0.05)?	Yes		Significantly different (P < 0.05)?	Yes		Significantly different (P < 0.05)?	Yes
	Data analyzed			Data analyzed			Data analyzed			Data analyzed
	Sample size, column A	9		Sample size, column A	9		Sample size, column A	9		Sample size, column A	9
	Sample size, column B	9		Sample size, column B	9		Sample size, column B	9		Sample size, column B	9
