# Supplementary material for: Oxaliplatin resistance in colorectal cancer enhances TRAIL sensitivity via death receptor 4 upregulation and lipid raft localization
Source: eLife. 2021 Aug 3;10:e67750. doi: 10.7554/eLife.67750 (PMC8331188; doi:10.7554/eLife.67750)
Supplement: Figure 5—source data 3. [file elife-67750-fig5-data3.xlsx]

## Sheet: Resveratrol DR4 coloc
Figure 5 (related to panel F and L)
	HCT116						Table Analyzed	HCT 116 Par vs Resveratrol DR4 coloc			SW620						Table Analyzed	SW620 Par vs Resveratrol DR4 coloc
	data			cleaned							data			cleaned
	DR4 Coloc			DR4 Coloc			Column B	Resveratrol			DR4 Coloc			DR4 Coloc			Column B	Resveratrol
	Parental	Resveratrol		Parental	Resveratrol		vs.	vs.			Parental	Resveratrol		Parental	Resveratrol		vs.	vs.
	1.963	13.13		1.963	13.13		Column A	Control			2.015	2.762		2.015	2.762		Column A	Control
	0.261	24.072		0.261							0.417	6.947		0.417	6.947
	0.556	19.904		0.556	19.904		Unpaired t test with Welch's correction				0.122	6.444		0.122	6.444		Unpaired t test with Welch's correction
	0.122	4.186		0.122	4.186		P value	0.0029			0.191	1.007		0.191	1.007		P value	<0.0001
	0	5.697		0	5.697		P value summary	**			0.069	2.536		0.069	2.536		P value summary	****
	0	1.389		0	1.389		Significantly different (P < 0.05)?	Yes			0.017	1.251		0.017	1.251		Significantly different (P < 0.05)?	Yes
	0	4.811		0	4.811		One- or two-tailed P value?	Two-tailed			0.017	5.158		0.017	5.158		One- or two-tailed P value?	Two-tailed
	0.017	13.773		0.017	13.773		Welch-corrected t, df	t=3.169, df=41.04			0.191	1.876		0.191	1.876		Welch-corrected t, df	t=7.022, df=42.84
	0.087	3.439		0.087	3.439						0.069	4.776		0.069	4.776
	0.33	1.389		0.33	1.389		How big is the difference?				0	1.563		0	1.563		How big is the difference?
	0.243	1.233		0.243	1.233		Mean of column A	0.4381			1.997	5.87		1.997	5.87		Mean of column A	0.4716
	0.104	3.057		0.104	3.057		Mean of column B	2.904			0.052	5.089		0.052	5.089		Mean of column B	2.903
	1.389	1.129		1.389	1.129		Difference between means (B - A) ± SEM	2.466 ± 0.7783			0.313	1.025		0.313	1.025		Difference between means (B - A) ± SEM	2.431 ± 0.3462
	0.33	0		0.33	0		95% confidence interval	0.8945 to 4.038			0.382	7.468		0.382	7.468		95% confidence interval	1.733 to 3.130
	0.399	1.059		0.399	1.059		R squared (eta squared)	0.1966			0.122	0.921		0.122	0.921		R squared (eta squared)	0.5351
	0.243	0.382		0.243	0.382						0.052	4.394		0.052	4.394
	0.069	7.538		0.069	7.538		F test to compare variances				0.712	24.628		0.712			F test to compare variances
	0.017	2.57		0.017	2.57		F, DFn, Dfd	24.38, 38, 39			0.208	4.307		0.208	4.307		F, DFn, Dfd	12.28, 37, 38
	1.511	0.243		1.511	0.243		P value	<0.0001			0.104	25.097		0.104			P value	<0.0001
	0.278	0.886		0.278	0.886		P value summary	****			0.122	1.685		0.122	1.685		P value summary	****
	0.069	1.754		0.069	1.754		Significantly different (P < 0.05)?	Yes			1.407	5.575		1.407	5.575		Significantly different (P < 0.05)?	Yes
	0.104	0.469		0.104	0.469						2.518	4.099			4.099
	0.122	1.077		0.122	1.077		Data analyzed				2.084	0.052		2.084	0.052		Data analyzed
	0.226	0.104		0.226	0.104		Sample size, column A	40			1.65	1.372		1.65	1.372		Sample size, column A	39
	0	0.365		0	0.365		Sample size, column B	39			0.122	4.55		0.122	4.55		Sample size, column B	38
	5.697	0.191		5.697	0.191						0.573	3.838		0.573	3.838
	0.122	0.017		0.122	0.017						0.504	0.747		0.504	0.747
	0	0.208		0	0.208						0.122	2.675		0.122	2.675
	0.122	0.365		0.122	0.365						0.625	0.921		0.625	0.921
	0.243	0.017		0.243	0.017						0.122	0.052		0.122	0.052
	0.017	0.052		0.017	0.052						0.087	1.598		0.087	1.598
	0	0.365		0	0.365						0.017	1.754		0.017	1.754
	0.104	15.944		0.104	15.944						0.191	3.977		0.191	3.977
	0.156	0.764		0.156	0.764						0.069	3.508		0.069	3.508
	1.077	2.223		1.077	2.223						0.764	1.824		0.764	1.824
	0.99	0.591		0.99	0.591						0.382	4.516		0.382	4.516
	0.382	0.486		0.382	0.486						0.729	1.424		0.729	1.424
	0.122	0.434		0.122	0.434						0.625	1.007		0.625	1.007
	0	1.077		0	1.077						0.851	0.729		0.851	0.729
	0.052	0.955		0.052	0.955						0.295	1.007		0.295	1.007
Avg	0.4381	3.43362		0.4381	2.90444					Avg	0.522725	4.00073		0.471564	2.90274
Std	0.953178	5.70121		0.953178	4.70485					Std	0.654707	5.17812		0.578736	2.02723
N	40	40		40	39					N	40	40		39	38
SEM	0.150711	0.90144		0.150711	0.753378					SEM	0.103518	0.818732		0.0926719	0.328859
STDx3	2.85953	17.1036		2.85953	14.1145					STDx3	1.96412	15.5344		1.73621	6.08168
Plus mean	3.29763	20.5373		3.29763	17.019					Plus mean	2.48685	19.5351		2.20777	8.98441

## Sheet: Nystatin DR4 coloc
Figure 5 (related to panel C and I)
	HCT116						Table Analyzed	HCT 116 OxR vs Nystatin DR4 coloc			SW620						Table Analyzed	SW620 OxR vs Nystatin DR4 coloc
	data			cleaned							data			cleaned
	DR4 Coloc			DR4 Coloc			Column B	Nystatin			DR4 Coloc			DR4 Coloc			Column B	Nystatin
	OxR Cont	Nystatin		OxR Cont	Nystatin		vs.	vs.			OxR Cont	Nystatin		OxR Cont	Nystatin		vs.	vs.
	24.159	0.069		24.159	0.069		Column A	Control			13.686	0.295		13.686	0.295		Column A	Control
	18.844	0		18.844	0						4.672	0		4.672	0
	24.75	0.243		24.75	0.243		Unpaired t test with Welch's correction				17.993	0.33		17.993	0.33		Unpaired t test with Welch's correction
	2.64	1.059		2.64	1.059		P value	0.0028			0.99	1.754		0.99	1.754		P value	<0.0001
	1.476	0		1.476	0		P value summary	**			1.094	0.382		1.094	0.382		P value summary	****
	0.556	0.069		0.556	0.069		Significantly different (P < 0.05)?	Yes			2.397	0.069		2.397	0.069		Significantly different (P < 0.05)?	Yes
	1.667	0		1.667	0		One- or two-tailed P value?	Two-tailed			2.049	2.067		2.049			One- or two-tailed P value?	Two-tailed
	1.494	0.625		1.494	0.625		Welch-corrected t, df	t=3.191, df=38.81			3.248	0		3.248	0		Welch-corrected t, df	t=6.235, df=37.46
	25.809	0.382		25.809	0.382						48.127	0			0
	0.035	0.486		0.035	0.486		How big is the difference?				43.785	0			0		How big is the difference?
	26.295	4.516		26.295			Mean of column A	4.536			6.166	0		6.166	0		Mean of column A	6.035
	4.603	2.935		4.603	2.935		Mean of column B	0.4965			7.52	0.017		7.52	0.017		Mean of column B	0.2956
	0.573	2.24		0.573	2.24		Difference between means (B - A) ± SEM	-4.039 ± 1.266			0.087	0		0.087	0		Difference between means (B - A) ± SEM	-5.740 ± 0.9205
	2.449	0.174		2.449	0.174		95% confidence interval	-6.600 to -1.479			10.925	0.261		10.925	0.261		95% confidence interval	-7.604 to -3.875
	0.729	1.581		0.729	1.581		R squared (eta squared)	0.2079			4.811	0.122		4.811	0.122		R squared (eta squared)	0.5093
	1.198	2.102		1.198	2.102						2.258	0.069		2.258	0.069
	0.868	0		0.868	0		F test to compare variances				10.039	0		10.039	0		F test to compare variances
	0.591	0.122		0.591	0.122		F, DFn, Dfd	93.82, 38, 38			5.436	0.66		5.436	0.66		F, DFn, Dfd	155.5, 37, 38
	2.275	0.035		2.275	0.035		P value	<0.0001			1.841	0.174		1.841	0.174		P value	<0.0001
	0.903	0.087		0.903	0.087		P value summary	****			2.675	1.355		2.675	1.355		P value summary	****
	1.268	0.087		1.268	0.087		Significantly different (P < 0.05)?	Yes			5.454	0.156		5.454	0.156		Significantly different (P < 0.05)?	Yes
	1.806	0.278		1.806	0.278						3.977	0		3.977	0
	0.938	0.087		0.938	0.087		Data analyzed				0.764	1.511		0.764	1.511		Data analyzed
	1.355	0.174		1.355	0.174		Sample size, column A	39			23.464	0		23.464	0		Sample size, column A	38
	2.102	0.208		2.102	0.208		Sample size, column B	39			3.144	0.035		3.144	0.035		Sample size, column B	39
	1.164	1.216		1.164	1.216						0.156	0.069		0.156	0.069
	0.851	0		0.851	0						2.032	0.069		2.032	0.069
	1.251	0		1.251	0						7.138	0.33		7.138	0.33
	1.372	0		1.372	0						3.092	0.469		3.092	0.469
	0.243	0.139		0.243	0.139						18.306	0		18.306	0
	0.556	0		0.556	0						6.999	0.104		6.999	0.104
	10.23	0.035		10.23	0.035						12.175	0.017		12.175	0.017
	8.076	0		8.076	0						11.915	0.382		11.915	0.382
	0.816	1.806		0.816	1.806						1.737	0.973		1.737	0.973
	0.591	2.657		0.591	2.657						10.334	1.094		10.334	1.094
	1.389	0.191		1.389	0.191						4.307	0.017		4.307	0.017
	0.729	0		0.729	0						0.608	0.052		0.608	0.052
	0.208	0		0.208	0						3.23	0.677		3.23	0.677
	0.035	0.243		0.035	0.243						12.019	0.069		12.019	0.069
		0.035			0.035						0.608	0.017		0.608	0.017
Avg	4.53574	0.597025		4.53574	0.496538					Avg	8.03145	0.3399		6.03542	0.295615
Std	7.76058	1.00978		7.76058	0.801189					Std	10.2729	0.521496		5.58179	0.447757
N	39	40		39	39					N	40	40		38	39
SEM	1.24269	0.159661		1.24269	0.128293					SEM	1.62429	0.0824558		0.905486	0.0716985
STDx3	23.2817	3.02935		23.2817	2.40357					STDx3	30.8187	1.56449		16.7454	1.34327
Plus mean	27.8175	3.62637		27.8175	2.90011					Plus mean	38.8502	1.90439		22.7808	1.63889
