# Supplementary material for: Oxaliplatin resistance in colorectal cancer enhances TRAIL sensitivity via death receptor 4 upregulation and lipid raft localization
Source: eLife. 2021 Aug 3;10:e67750. doi: 10.7554/eLife.67750 (PMC8331188; doi:10.7554/eLife.67750)
Supplement: Figure 6—source data 1. [file elife-67750-fig6-data1.xlsx]

## Sheet: Sheet1
Figure 6 (related to panel B)
												Table Analyzed
		Palmitalation
			DR4 -	GAPDH -	GAPDH	DR4/GAPDH	DR4/GAPDHnorm					Column B	OxR
			Flux	Flux	Norm	Norm	Norm					vs.	vs.
		P1 - IFC	0.195	0.871	1	0.223881	0.195	0.153	Normalization to IFC and APC			Column A	Parental
		P1 - Exp (+)	0.0593	0.643	0.738232	0.092224	0.0803271	0.387582	%Palmitoylation DR4 SW620 Par t1
		P1 - APC (-)	0.111	0.658	0.755454	0.168693	0.146932					Unpaired t test with Welch's correction
		OXR1 - IFC	0.191	0.601	0.690011	0.317804	0.276807	0.181	Normalization to IFC and APC			P value	0.0342
		OXR1 - Exp (+)	0.0973	0.779	0.894374	0.124904	0.108791	0.537569	%Palmitoylation DR4 SW620 OxR t1			P value summary	*
		OXR1 - APC (-)	0.171	0.851	0.977038	0.20094	0.175019					Significantly different (P < 0.05)?	Yes
		P1 - IFC										One- or two-tailed P value?	Two-tailed
		P2 - IFC	0.167	0.848	0.973594	0.196934	0.171529	0.143	Normalization to IFC and APC			Welch-corrected t, df	t=3.178, df=3.947
		P2 - Exp (+)	0.0619	0.869	0.997704	0.0712313	0.0620425	0.432867	%Palmitoylation DR4 SW620 Par t2
		P2 - APC (-)	0.119	0.857	0.983927	0.138856	0.120944					How big is the difference?
		OXR2 - IFC	0.149	0.762	0.874856	0.195538	0.170314	0.1385	Normalization to IFC and APC			Mean of column A	43.43
		OXR2 - Exp (+)	0.0716	0.774	0.888634	0.0925065	0.0805731	0.516968	%Palmitoylation DR4 SW620 OxR t2			Mean of column B	55.1
		OXR2 - APC (-)	0.128	0.865	0.993111	0.147977	0.128888					Difference between means (B - A) ± SEM	11.66 ± 3.669
		P1 - IFC										95% confidence interval	1.421 to 21.91
		P3 - IFC	0.104	0.625	0.717566	0.1664	0.144934	0.10115	Normalization to IFC and APC			R squared (eta squared)	0.7191
		P3 - Exp (+)	0.0488	0.558	0.640643	0.0874552	0.0761735	0.482452	%Palmitoylation DR4 SW620 Par t3
		P3 - APC (-)	0.0983	0.635	0.729047	0.154803	0.134834					F test to compare variances
		OXR3 - IFC	0.119	0.719	0.825488	0.165508	0.144157	0.1068	Normalization to IFC and APC			F, DFn, Dfd	1.261, 2, 2
		OXR3 - Exp (+)	0.0639	0.574	0.659013	0.111324	0.0969632	0.598315	%Palmitoylation DR4 SW620 OxR t3			P value	0.8845
		OXR3 - APC (-)	0.0946	0.634	0.727899	0.149211	0.129963					P value summary	ns
												Significantly different (P < 0.05)?	No
												Data analyzed
												Sample size, column A	3
												Sample size, column B	3
