# Supplementary material for: Oxaliplatin resistance in colorectal cancer enhances TRAIL sensitivity via death receptor 4 upregulation and lipid raft localization
Source: eLife. 2021 Aug 3;10:e67750. doi: 10.7554/eLife.67750 (PMC8331188; doi:10.7554/eLife.67750)
Supplement: Figure 6—source data 2. [file elife-67750-fig6-data2.xlsx]

## Sheet: 2BP cell viability
Figure 6 (related to panel E)
620 Par	t1							620 Par	t2							620 Par	t3
0	87.2	90.9	92.2	90.1				0	82.2	85.7	87.3	85.0667				0	85.4	83.2	94.5	87.7
0.1	91.4	90.6	89.5	90.5				0.1	89.1	88.9	82.2	86.7333				0.1	88.7	89	80.9	86.2
1	90.1	89.5	91.2	90.2667				1	83.8	81.8	80.3	81.9667				1	83.2	81.9	85.7	83.6
10	88.7	88.8	87.2	88.2333				10	83.4	83.3	79.3	82				10	86.5	84.4	77.2	82.7
50	82.2	81.4	80.5	81.3667				50	72.3	72.9	76.9	74.0333				50	71.2	74.5	74.6	73.4333
200	81.4	78.8	74.9	78.3667				200	69.9	69.7	69.2	69.6				200	71.7	72.1	73	72.2667
1000	78.8	78.2	79.7	78.9				1000	68	67.7	66.9	67.5333				1000	66.9	69.8	73.2	69.9667
				Avg	Std							Avg	Std							Avg	Std
0	0.967814	1.00888	1.02331	1	0.0235092			0	0.966301	1.00745	1.02625	1	0.0250355			0	0.973774	0.948689	1.07754	1	0.0557752
0.1	1.01443	1.00555	0.993341	1.00444	0.00864471			0.1	1.04741	1.04506	0.966301	1.01959	0.037695			0.1	1.0114	1.01482	0.922463	0.982896	0.0427556
1	1	0.993341	1.01221	1.00185	0.00781306			1	0.98511	0.961599	0.943966	0.963558	0.0168541			1	0.948689	0.933865	0.977195	0.95325	0.0179808
10	0.984462	0.985572	0.967814	0.979282	0.00812227			10	0.980408	0.979232	0.93221	0.96395	0.0224486			10	0.986317	0.962372	0.880274	0.942987	0.0454101
50	0.91232	0.903441	0.893452	0.903071	0.00770724			50	0.849922	0.856975	0.903997	0.870298	0.0240022			50	0.811859	0.849487	0.850627	0.837324	0.0180129
200	0.903441	0.874584	0.831299	0.869774	0.0296476			200	0.821708	0.819357	0.81348	0.818182	0.00346072			200	0.81756	0.822121	0.832383	0.824021	0.00619898
1000	0.874584	0.867925	0.884573	0.875694	0.00684175			1000	0.799373	0.795846	0.786442	0.793887	0.00545783			1000	0.762828	0.795895	0.834664	0.797796	0.0293576
620 OxR								620 OxR								620 OxR
0	92.9	95.9	93.5	94.1				0	92.5	94.3	94.3	93.7				0	95.7	93.1	94	94.2667
0.1	90.8	90.9	89.9	90.5333				0.1	94.2	95.1	93.1	94.1333				0.1	93	93.7	93.8	93.5
1	91.5	92.3	91.5	91.7667				1	92.5	92.7	92.8	92.6667				1	93.7	93.9	93.9	93.8333
10	85.6	85.8	85.8	85.7333				10	87.2	85.7	84.6	85.8333				10	80.8	78.2	79.7	79.5667
50	78.9	78.6	77.4	78.3				50	75	74.3	79.5	76.2667				50	69.7	67.4	72.3	69.8
200	71.2	73.2	74.3	72.9				200	72.9	74.4	70.9	72.7333				200	61.2	66.9	71.6	66.5667
1000	73.4	74	75.9	74.4333				1000	70.5	67.1	66.3	67.9667				1000	64.2	65.3	65.4	64.9667
				Avg	Std							Avg	Std							Avg	Std
0	0.987248	1.01913	0.993624	1	0.0137742			0	0.987193	1.0064	1.0064	1	0.0090558			0	1.01521	0.987624	0.997171	1	0.0114363
0.1	0.964931	0.965994	0.955367	0.962097	0.00477887			0.1	1.00534	1.01494	0.993597	1.00462	0.00872846			0.1	0.986563	0.993989	0.99505	0.991867	0.00377549
1	0.97237	0.980871	0.97237	0.975204	0.00400769			1	0.987193	0.989328	0.990395	0.988972	0.00133108			1	0.993989	0.99611	0.99611	0.995403	0.00100015
10	0.909671	0.911796	0.911796	0.911087	0.00100192			10	0.93063	0.914621	0.902882	0.916044	0.0113727			10	0.857143	0.829562	0.845474	0.844059	0.0113044
50	0.83847	0.835282	0.822529	0.832094	0.00688708			50	0.800427	0.792956	0.848453	0.813945	0.0245902			50	0.739392	0.714993	0.766973	0.740453	0.0212341
200	0.756642	0.777896	0.789586	0.774708	0.0136368			200	0.778015	0.794023	0.75667	0.776236	0.0153012			200	0.649222	0.709689	0.759547	0.706153	0.0451095
1000	0.780021	0.786397	0.806589	0.791002	0.0113244			1000	0.752401	0.716115	0.707577	0.725365	0.0194329			1000	0.681047	0.692716	0.693777	0.68918	0.00576715

## Sheet: 2BP apoptosis
Figure 6 (related to panel D)
	SW620 Par													SW620 OxR
[TRAIL]	0			0 +2bp			1000			1000+2bp				0			0 +2bp			1000			1000+2bp					Number of families	1
	Early apop	Late apop	Total apoptotic	Early apop	Late apop	Total apoptotic	Early apop	Late apop	Total apoptotic	Early apop	Late apop	Total apoptotic		Early apop	Late apop	Total apoptotic	Early apop	Late apop	Total apoptotic	Early apop	Late apop	Total apoptotic	Early apop	Late apop	Total apoptotic			Number of comparisons per family	28
t1	1.22	4.13	5.35	1.42	4.13	5.55	2.18	36.3	38.48	3.82	8.93	12.75		3.81	4.19	8	1.28	2.89	4.17	6.66	48.4	55.06	4.65	14.7	19.35			Alpha	0.05
	1.08	4.14	5.22	1.41	1.63	3.04	1.85	35.6	37.45	6.26	7.57	13.83		3.24	4.77	8.01	1.23	2.48	3.71	4.88	50	54.88	5.21	14.1	19.31
	2.83	4.93	7.76	1.22	1.18	2.4	1.93	33.6	35.53	7.85	5.83	13.68		6.45	5.55	12	1.44	2.35	3.79	5.58	47.1	52.68	5.47	12.2	17.67			Tukey's multiple comparisons test	Mean Diff.	95.00% CI of diff.	Below threshold?	Summary	Adjusted P Value
t2	3.42	2.34	5.76	1.46	3.71	5.17	15.5	15.4	30.9	6.56	12	18.56		4.56	3.31	7.87	1.07	2.15	3.22	23.5	39.9	63.4	9.19	13.1	22.29			0 vs. 0 +2bp	4.106	-0.7676 to 8.979	No	ns	0.1611	A-B
	4.63	4.18	8.81	1.23	2.87	4.1	16.1	16.8	32.9	8.52	10.8	19.32		5.36	2.82	8.18	0.72	1.63	2.35	25.4	36.4	61.8	8.48	15.7	24.18			0 vs. 1000	-24.31	-29.18 to -19.43	Yes	****	<0.0001	A-C
	3.53	2.73	6.26	2.01	2.86	4.87	15.4	14.4	29.8	8.18	11.6	19.78		5.15	3.74	8.89	0.75	1.24	1.99	23.9	42.4	66.3	9.33	15.8	25.13			0 vs. 1000+2bp	-8.058	-12.93 to -3.185	Yes	****	<0.0001	A-D
t3	10.9	4.18	15.08	1.73	2.6	4.33	14.5	17.4	31.9	9.51	11.5	21.01		4.45	7.95	12.4	1.25	0.65	1.9	5.55	60.4	65.95	5.2	20.3	25.5			0 vs. 0	-0.55	-5.423 to 4.323	No	ns	>0.9999	A-E
	8.21	4.32	12.53	3.11	3.9	7.01	13.7	17.7	31.4	9.3	9.65	18.95		3.66	6.65	10.31	2.08	2.37	4.45	5.93	60.4	66.33	10.2	17.2	27.4			0 vs. 0 +2bp	5.831	0.9579 to 10.70	Yes	**	0.0087	A-F
	10.6	4.52	15.12	3.54	4.93	8.47	14.2	18.1	32.3	9.44	7.09	16.53		3.67	7.51	11.18	2.01	1.82	3.83	6.55	60.6	67.15	7.91	15.5	23.41			0 vs. 1000	-52.41	-57.28 to -47.53	Yes	****	<0.0001	A-G
																												0 vs. 1000+2bp	-13.59	-18.47 to -8.721	Yes	****	<0.0001	A-H
																												0 +2bp vs. 1000	-28.41	-33.29 to -23.54	Yes	****	<0.0001	B-C
																												0 +2bp vs. 1000+2bp	-12.16	-17.04 to -7.290	Yes	****	<0.0001	B-D
																												0 +2bp vs. 0	-4.656	-9.529 to 0.2176	No	ns	0.0713	B-E
																												0 +2bp vs. 0 +2bp	1.726	-3.148 to 6.599	No	ns	0.9524	B-F
																												0 +2bp vs. 1000	-56.51	-61.39 to -51.64	Yes	****	<0.0001	B-G
																												0 +2bp vs. 1000+2bp	-17.7	-22.57 to -12.83	Yes	****	<0.0001	B-H
																												1000 vs. 1000+2bp	16.25	11.38 to 21.12	Yes	****	<0.0001	C-D
																												1000 vs. 0	23.76	18.88 to 28.63	Yes	****	<0.0001	C-E
																												1000 vs. 0 +2bp	30.14	25.27 to 35.01	Yes	****	<0.0001	C-F
																												1000 vs. 1000	-28.1	-32.97 to -23.23	Yes	****	<0.0001	C-G
																												1000 vs. 1000+2bp	10.71	5.840 to 15.59	Yes	****	<0.0001	C-H
																												1000+2bp vs. 0	7.508	2.635 to 12.38	Yes	***	0.0002	D-E
																												1000+2bp vs. 0 +2bp	13.89	9.016 to 18.76	Yes	****	<0.0001	D-F
																												1000+2bp vs. 1000	-44.35	-49.22 to -39.48	Yes	****	<0.0001	D-G
																												1000+2bp vs. 1000+2bp	-5.537	-10.41 to -0.6635	Yes	*	0.0153	D-H
																												0 vs. 0 +2bp	6.381	1.508 to 11.25	Yes	**	0.0028	E-F
																												0 vs. 1000	-51.86	-56.73 to -46.98	Yes	****	<0.0001	E-G
																												0 vs. 1000+2bp	-13.04	-17.92 to -8.171	Yes	****	<0.0001	E-H
																												0 +2bp vs. 1000	-58.24	-63.11 to -53.36	Yes	****	<0.0001	F-G
																												0 +2bp vs. 1000+2bp	-19.43	-24.30 to -14.55	Yes	****	<0.0001	F-H
																												1000 vs. 1000+2bp	38.81	33.94 to 43.69	Yes	****	<0.0001	G-H
																												Test details	Mean 1	Mean 2	Mean Diff.	SE of diff.	n1	n2	q	DF
																												0 vs. 0 +2bp	9.099	4.993	4.106	1.555	9	9	3.733	64
																												0 vs. 1000	9.099	33.41	-24.31	1.555	9	9	22.1	64
																												0 vs. 1000+2bp	9.099	17.16	-8.058	1.555	9	9	7.327	64
																												0 vs. 0	9.099	9.649	-0.55	1.555	9	9	0.5001	64
																												0 vs. 0 +2bp	9.099	3.268	5.831	1.555	9	9	5.302	64
																												0 vs. 1000	9.099	61.51	-52.41	1.555	9	9	47.65	64
																												0 vs. 1000+2bp	9.099	22.69	-13.59	1.555	9	9	12.36	64
																												0 +2bp vs. 1000	4.993	33.41	-28.41	1.555	9	9	25.84	64
																												0 +2bp vs. 1000+2bp	4.993	17.16	-12.16	1.555	9	9	11.06	64
																												0 +2bp vs. 0	4.993	9.649	-4.656	1.555	9	9	4.233	64
																												0 +2bp vs. 0 +2bp	4.993	3.268	1.726	1.555	9	9	1.569	64
																												0 +2bp vs. 1000	4.993	61.51	-56.51	1.555	9	9	51.39	64
																												0 +2bp vs. 1000+2bp	4.993	22.69	-17.7	1.555	9	9	16.09	64
																												1000 vs. 1000+2bp	33.41	17.16	16.25	1.555	9	9	14.78	64
																												1000 vs. 0	33.41	9.649	23.76	1.555	9	9	21.6	64
																												1000 vs. 0 +2bp	33.41	3.268	30.14	1.555	9	9	27.41	64
																												1000 vs. 1000	33.41	61.51	-28.1	1.555	9	9	25.55	64
																												1000 vs. 1000+2bp	33.41	22.69	10.71	1.555	9	9	9.742	64
																												1000+2bp vs. 0	17.16	9.649	7.508	1.555	9	9	6.827	64
																												1000+2bp vs. 0 +2bp	17.16	3.268	13.89	1.555	9	9	12.63	64
																												1000+2bp vs. 1000	17.16	61.51	-44.35	1.555	9	9	40.33	64
																												1000+2bp vs. 1000+2bp	17.16	22.69	-5.537	1.555	9	9	5.035	64
																												0 vs. 0 +2bp	9.649	3.268	6.381	1.555	9	9	5.802	64
																												0 vs. 1000	9.649	61.51	-51.86	1.555	9	9	47.15	64
																												0 vs. 1000+2bp	9.649	22.69	-13.04	1.555	9	9	11.86	64
																												0 +2bp vs. 1000	3.268	61.51	-58.24	1.555	9	9	52.96	64
																												0 +2bp vs. 1000+2bp	3.268	22.69	-19.43	1.555	9	9	17.66	64
																												1000 vs. 1000+2bp	61.51	22.69	38.81	1.555	9	9	35.29	64

## Sheet: TRAIL Sensitization
Figure 6 (related to panel C)
SW620 2BP										Avg	Std		SW620 OxR 2BP									Avg	Dev	% TRAIL Sensitization	SDNUm	TRAIL Sensitization SD		Table Analyzed	Max TRAIL sensitization 2BP
0	96.7814	100.888	102.331	96.6301	100.745	102.625	97.3774	94.8689	107.754	100	3.78168		98.7248	101.913	99.3624	98.7193	100.64	100.64	101.521	98.7624	99.7171	100	1.15834	0	3.95511	#DIV/0!
0.1	101.443	100.555	99.3341	104.741	104.506	96.6301	101.14	101.482	92.2463	100.231	3.65322		96.4931	96.5994	95.5367	100.534	101.494	99.3597	98.6563	99.3989	99.505	98.6196	1.88486	1.6076	4.1108	4.10175		Column B	SW620 OxR + 2BP
1	100	99.3341	101.221	98.511	96.1599	94.3966	94.8689	93.3865	97.7195	97.2886	2.56899		97.237	98.0871	97.237	98.7193	98.9328	99.0395	99.3989	99.611	99.611	98.6526	0.879041	-1.40206	2.71522	2.79114		vs.	vs.
10	98.4462	98.5572	96.7814	98.0408	97.9232	93.221	98.6317	96.2372	88.0274	96.2073	3.31457		90.9671	91.1796	91.1796	93.063	91.4621	90.2882	85.7143	82.9562	84.5474	89.0397	3.41134	7.45018	4.75643	4.9506		Column A	SW620 OxR
50	91.232	90.3441	89.3452	84.9922	85.6975	90.3997	81.1859	84.9487	85.0627	87.0231	3.22556		83.847	83.5282	82.2529	80.0427	79.2956	84.8453	73.9392	71.4993	76.6973	79.5497	4.40171	8.58781	5.45704	6.27887
200	90.3441	87.4584	83.1299	82.1708	81.9357	81.348	81.756	82.2121	83.2383	83.7326	2.9016		75.6642	77.7896	78.9586	77.8015	79.4023	75.667	64.9222	70.9689	75.9547	75.2366	4.34341	10.1466	5.22346	6.24816		Unpaired t test with Welch's correction
1000	87.4584	86.7925	88.4573	79.9373	79.5846	78.6442	76.2828	79.5895	83.4664	82.2459	4.16215		78.0021	78.6397	80.6589	75.2401	71.6115	70.7577	68.1047	69.2716	69.3777	73.5182	4.42254	10.6117	6.07308	7.40356		P value	<0.0001
																												P value summary	****
																												Significantly different (P < 0.05)?	Yes
																												One- or two-tailed P value?	Two-tailed
																												Welch-corrected t, df	t=9.620, df=13.51
																												How big is the difference?
																												Mean of column A	55.04
																												Mean of column B	10.61
																												Difference between means (B - A) ± SEM	-44.43 ± 4.618
																												95% confidence interval	-54.37 to -34.49
																												R squared (eta squared)	0.8726
																												F test to compare variances
																												F, DFn, Dfd	2.502, 8, 8
																												P value	0.2161
																												P value summary	ns
																												Significantly different (P < 0.05)?	No
																												Data analyzed
																												Sample size, column A	9
																												Sample size, column B	9
