# Supplementary material for: Oxaliplatin resistance in colorectal cancer enhances TRAIL sensitivity via death receptor 4 upregulation and lipid raft localization
Source: eLife. 2021 Aug 3;10:e67750. doi: 10.7554/eLife.67750 (PMC8331188; doi:10.7554/eLife.67750)
Supplement: Figure 7—figure supplement 1—source data 1. [file elife-67750-fig7-figsupp1-data1.xlsx]

## Sheet: Sheet1
Figure 7-figure supplement 1
	Raw CTC counts (cells/ml)
	P01-1	P01-2	P02-1	P04-1	P05-1	P06-1	P06-2	P06-3	P07-1	P07-2	P07-3	P08-1	P09-1	P09-2	P10-1	P11-1	P12-1	P12-2	P12-3	P13-1	P15-1		Avg	Std	N
Control Liposomes	3.15517	595.778	1442	1229.83	1659.8	549.199	392.687	135.187	886.228	1547.14	435.604	1133	1081.5	22016.2	360.5	72.0999	3973.01	1152.31	1960.22	695.817	1306.81		2029.91	4548.49	21
TRAIL Liposomes	1.60627	509.119	347.625	322.948	1117.17	247.844	70.8124	25.75	315.437	1164.11	187.76	469.937	405.562	6759.37	0	0	2666.2	746.749	1411.96	265.073	848.676		851.605	1457.07	21
soluble TRAIL	4.3025	485.288	1152.31	570.791	1704.86	713.489	57.9375	83.6874	781.083	1629.76	232.823	732.265	901.249	16801.9	82.6145	18.025	4866.75	972.062	2095.4	112.656	1464.53		1688.75	3542.82	21
Oxaliplatin	3.0978	589.278	1377.62	713.489	1351.87	281.64	297.086	148.062	615.854	826.145	195.271	1120.12	766.062	8239.99	428.093	78.8593	3372.17	1062.19	2591.09	1066.92	1028.93		1245.42	1754.42	21
