# Supplementary material for: Oxaliplatin resistance in colorectal cancer enhances TRAIL sensitivity via death receptor 4 upregulation and lipid raft localization
Source: eLife. 2021 Aug 3;10:e67750. doi: 10.7554/eLife.67750 (PMC8331188; doi:10.7554/eLife.67750)
Supplement: Figure 7—figure supplement 2—source data 1. [file elife-67750-fig7-figsupp2-data1.xlsx]

## Sheet: Oxali sens vs resistant 
Figure 7-figure supplement 2 (related to A)
Oxali Sensitve (<80)
																Table Analyzed	Oxali Sen vs OXR EST Reduction in CTC Viab
P	04-1A	06-1A	P06-2	07-1A	P07-2	P07-3	P09-2	09-1A	15-1A
Control Liposomes	100	100	100	100	100	100	100	100	100							Column B	OxR
TRAIL Liposomes	26.2595	45.1282	18.0328	35.5932	75.2427	43.1034	30.7018	37.5	64.9425							vs.	vs.
soluble TRAIL	46.4122	129.915	14.7541	88.1356	105.34	53.4483	76.3158	83.3333	112.069							Column A	Oxali Sensitive
Oxaliplatin	58.0153	51.2821	75.6546	69.4915	53.3981	44.8276	37.4269	70.8333	78.7356
REDUCTION 100-EST	73.7405	54.8718	81.9672	64.4068	24.7573	56.8966	69.2982	62.5	35.0575							Unpaired t test with Welch's correction
																P value	0.8202
OxR (>80)																P value summary	ns
																Significantly different (P < 0.05)?	No
P	01-1A	P01-2	02-1A	05-1A	P06-3	08-1A	11-1A	12-1A	P12-2	P12-3	13-1A	10-1A				One- or two-tailed P value?	Two-tailed
Control Liposomes	100	100	100	100	100	100	100	100	100	100	100	100				Welch-corrected t, df	t=0.2305, df=18.63
TRAIL Liposomes	50.9091	85.4545	24.1071	67.3077	19.0476	41.4773	0	67.1078	64.8045	72.0307	38.0952	0
soluble TRAIL	136.364	81.4545	79.9107	102.715	61.9048	64.6307	25	122.495	84.3575	106.897	16.1905	22.9167				How big is the difference?
Oxaliplatin	98.1818	98.9091	95.5357	81.448	109.524	98.8636	109.375	84.8771	92.1788	132.184	153.333	118.75				Mean of column A	58.17
REDUCTION 100-EST	49.0909	14.5455	75.8929	32.6923	80.9524	58.5227	100	32.8922	35.1955	27.9693	61.9048	100				Mean of column B	55.8
																Difference between means (B - A) ± SEM	-2.361 ± 10.25
																95% confidence interval	-23.84 to 19.11
																R squared (eta squared)	0.002844
																F test to compare variances
																F, DFn, Dfd	2.465, 11, 8
																P value	0.2104
																P value summary	ns
																Significantly different (P < 0.05)?	No
																Data analyzed
																Sample size, column A	9
																Sample size, column B	12

## Sheet: Failed vs undergoing oxali
Figure 7-figure supplement 2 (related to B)
On oxali																Table Analyzed	Failed vs on Oxali ESt reduct
	02-1A	05-1A	07-1A	P07-2	10-1A	11-1A	13-1A	15-1A
Control Liposomes	100	100	100	100	100	100	100	100								Column B	Failed Oxaliplatin
TRAIL Liposomes	24.1071	67.3077	35.5932	75.2427	0	0	38.0952	64.9425								vs.	vs.
soluble TRAIL	79.9107	102.715	88.1356	105.34	22.9167	25	16.1905	112.069								Column A	Undergoing Oxaliplatin
Oxaliplatin	95.5357	81.448	69.4915	53.3981	118.75	109.375	153.333	78.7356
REDUCTION 100-EST	75.8929	32.6923	64.4068	24.7573	100	100	61.9048	35.0575								Unpaired t test with Welch's correction
																P value	0.5097
																P value summary	ns
																Significantly different (P < 0.05)?	No
Failed oxali																One- or two-tailed P value?	Two-tailed
	01-1A	P01-2	04-1A	06-1A	P06-2	P06-3	P07-3	08-1A	09-1A	P09-2	12-1A	P12-2	P12-3			Welch-corrected t, df	t=0.6805, df=11.42
Control Liposomes	100	100	100	100	100	100	100	100	100	100	100	100	100
TRAIL Liposomes	50.9091	85.4545	26.2595	45.1282	18.0328	19.0476	43.1034	41.4773	37.5	30.7018	67.1078	64.8045	72.0307			How big is the difference?
soluble TRAIL	136.364	81.4545	46.4122	129.915	14.7541	61.9048	53.4483	64.6307	83.3333	76.3158	122.495	84.3575	106.897			Mean of column A	61.84
Oxaliplatin	98.1818	98.9091	58.0153	51.2821	75.6546	109.524	44.8276	98.8636	70.8333	37.4269	84.8771	92.1788	132.184			Mean of column B	53.73
REDUCTION 100-EST	49.0909	14.5455	73.7405	54.8718	81.9672	80.9524	56.8966	58.5227	62.5	69.2982	32.8922	35.1955	27.9693			Difference between means (B - A) ± SEM	-8.113 ± 11.92
																95% confidence interval	-34.23 to 18.01
																R squared (eta squared)	0.03897
																F test to compare variances
																F, DFn, Dfd	1.963, 7, 12
																P value	0.2909
																P value summary	ns
																Significantly different (P < 0.05)?	No
																Data analyzed
																Sample size, column A	8
																Sample size, column B	13
