# Supplementary material for: Oxaliplatin resistance in colorectal cancer enhances TRAIL sensitivity via death receptor 4 upregulation and lipid raft localization
Source: eLife. 2021 Aug 3;10:e67750. doi: 10.7554/eLife.67750 (PMC8331188; doi:10.7554/eLife.67750)
Supplement: Figure 7—figure supplement 2—source data 2. [file elife-67750-fig7-figsupp2-data2.xlsx]

## Sheet: Sheet1
Figure 7-figure supplement 2 (related to C, D)
									DR4 with TRAIL liposome correlation				DR4 with Oxaliplatin correlation
Patient	Draw	DR4			Oxaliplatin (CTC viability)	EST (CTC viability)			Best-fit values				Best-fit values
		Avg	Std	N					Slope	-0.123			Slope	0.05851
1	1				98.1818	50.9091			Y-intercept	11.64			Y-intercept	1.273
	2	1.00038	1.59209	40	98.9091	85.4545			X-intercept	94.6			X-intercept	-21.76
	3	6.67808	5.19238	12					1/slope	-8.128			1/slope	17.09
2	1				95.5357	24.1071
3	1								Std. Error				Std. Error
4	1	0.452053	0.558127	38	58.0153	26.2595			Slope	0.01613			Slope	0.01501
5	1	0.791575	0.897293	40	81.448	67.3077			Y-intercept	0.823			Y-intercept	1.328
6	1	1.05161	3.0431	31	51.2821	45.1282
	2	29.5935	12.6792	38	75.6546	18.0328			95% Confidence Intervals				95% Confidence Intervals
	3	2.30704	4.95684	27	109.524	19.0476			Slope	-0.1547 to -0.09135			Slope	0.02902 to 0.08799
7	1	5.815	7.25965	26	69.4915	35.5932			Y-intercept	10.02 to 13.25			Y-intercept	-1.335 to 3.881
	2	2.70264	3.2293	28	53.3981	75.2427			X-intercept	82.77 to 113.6			X-intercept	-131.0 to 15.49
	3	6.96561	5.32619	18	44.8276	43.1034
8	1	5.815	7.25965	26	98.8636	41.4773			Goodness of Fit				Goodness of Fit
9	1	3.71631	4.46564	39	70.8333	37.5			R squared	0.08893			R squared	0.02484
	2	4.44585	5.02016	40	37.4269	30.7018			Sy.x	9.943			Sy.x	10.29
10	1	12.3195	7.92607	32	118.75	0
	2								Is slope significantly non-zero?				Is slope significantly non-zero?
11	1	4.19931	5.25095	32	109.375	0			F	58.18			F	15.18
12	1	8.91938	10.5154	26	84.8771	67.1078			DFn, DFd	1, 596			DFn, DFd	1, 596
		8.27408	10.8415	36	92.1788	64.8045			P value	<0.0001			P value	0.0001
		0.099	0.168467	40	132.184	72.0307			Deviation from zero?	Significant			Deviation from zero?	Significant
13	1	34.3678	10.486	14	153.333	38.0952
15	1	0.656148	1.41587	27	78.7356	64.9425			Equation	Y = -0.1230*X + 11.64			Equation	Y = 0.05851*X + 1.273
									Data				Data
									Number of X values	599			Number of X values	599
									Maximum number of Y replicates	1			Maximum number of Y replicates	1
									Total number of values	598			Total number of values	598
									Number of missing values	1			Number of missing values	1
