# Supplementary material for: Oxaliplatin resistance in colorectal cancer enhances TRAIL sensitivity via death receptor 4 upregulation and lipid raft localization
Source: eLife. 2021 Aug 3;10:e67750. doi: 10.7554/eLife.67750 (PMC8331188; doi:10.7554/eLife.67750)
Supplement: Figure 7—figure supplement 2—source data 3. [file elife-67750-fig7-figsupp2-data3.xlsx]

## Sheet: Sheet1
Figure 7-figure supplement 2 (related to E)
	Patient	P06			P07			P09			P12
		Mean	SD	N	Mean	SD	N	Mean	SD	N	Mean	SD	N
	Draw 1	0.019032	0.071964	31	1.22381	2.42017	26	0.930308	1.66869	39	7.14773	6.30755	26
	Draw 2	9.92553	9.30332	38	1.90486	2.67949	28	4.1701	4.71556	40	5.16697	4.44217	36
	Draw 3	2.00118	4.53347	27	6.58828	5.12372	18				0.048175	0.090289	40
