# Supplementary material for: Oxaliplatin resistance in colorectal cancer enhances TRAIL sensitivity via death receptor 4 upregulation and lipid raft localization
Source: eLife. 2021 Aug 3;10:e67750. doi: 10.7554/eLife.67750 (PMC8331188; doi:10.7554/eLife.67750)
Supplement: Figure 7—source data 1. [file elife-67750-fig7-data1.xlsx]

## Sheet: CTC normalized viabilty
Figure 7 (related to panel B)
Percent viable CTCs
Patient	01-1A	P01-2	02-1A	04-1A	05-1A	06-1A	P06-2	P06-3	07-1A	P07-2	P07-3	08-1A	09-1A	P09-2	10-1A	11-1A	12-1A	P12-2	P12-3	13-1A	15-1A		Avg	STD	N		Number of families	1
Control Liposomes	100	100	100	100	100	100	100	100	100	100	100	100	100	100	100	100	100	100	100	100	100		100	6.93419e-15	21		Number of comparisons per family	6
TRAIL Liposomes	50.9091	85.4545	24.1071	26.2595	67.3077	45.1282	18.0328	19.0476	35.5932	75.2427	43.1034	41.4773	37.5	30.7018	0	0	67.1078	64.8045	72.0307	38.0952	64.9425		43.1831	23.5787	21		Alpha	0.05
soluble TRAIL	136.364	81.4545	79.9107	46.4122	102.715	129.915	14.7541	61.9048	88.1356	105.34	53.4483	64.6307	83.3333	76.3158	22.9167	25	122.495	84.3575	106.897	16.1905	112.069		76.8837	36.0562	21
Oxaliplatin	98.1818	98.9091	95.5357	58.0153	81.448	51.2821	75.6546	109.524	69.4915	53.3981	44.8276	98.8636	70.8333	37.4269	118.75	109.375	84.8771	92.1788	132.184	153.333	78.7356		86.325	28.6495	21		Tukey's multiple comparisons test	Mean Diff.	95.00% CI of diff.	Below threshold?	Summary
																											Naked vs. EST Liposomes	56.82	35.87 to 77.76	Yes	****		A-B
																											Naked vs. Soluble	23.12	2.169 to 44.06	Yes	*		A-C
																											Naked vs. Oxaliplatin	13.68	-7.272 to 34.62	No	ns		A-D
																											EST Liposomes vs. Soluble	-33.7	-54.65 to -12.75	Yes	***		B-C
																											EST Liposomes vs. Oxaliplatin	-43.14	-64.09 to -22.19	Yes	****		B-D
																											Soluble vs. Oxaliplatin	-9.441	-30.39 to 11.51	No	ns		C-D
																											Test details	Mean 1	Mean 2	Mean Diff.	SE of diff.	n1	n2	q	DF
																											Naked vs. EST Liposomes	100	43.18	56.82	7.983	21	21	10.06	80
																											Naked vs. Soluble	100	76.88	23.12	7.983	21	21	4.095	80
																											Naked vs. Oxaliplatin	100	86.33	13.68	7.983	21	21	2.422	80
																											EST Liposomes vs. Soluble	43.18	76.88	-33.7	7.983	21	21	5.97	80
																											EST Liposomes vs. Oxaliplatin	43.18	86.33	-43.14	7.983	21	21	7.642	80
																											Soluble vs. Oxaliplatin	76.88	86.33	-9.441	7.983	21	21	1.672	80

## Sheet: By met location
Figure 7 (related to panel D)
Metastatic Location	LN			Lungs			Liver			Peritoneal Carcinamotosis			Liver and Lung			Bone
	Patients	TRAIL Liposomes	reduction	Patients	TRAIL Liposomes	reduction	Patients	TRAIL Liposomes	reduction	Patients	TRAIL Liposomes	reduction	Patients	TRAIL Liposomes	reduction	Patients	TRAIL Liposomes	reduction
	1.1	50.9	49.1	5	67.3	32.7	2	24.1	75.9	7.1	35.59	64.41				13	38.1	61.9
	1.2	85.5	14.5	6.1	45.1	54.9	9.1	37.5	62.5	7.2	75.2427	24.7573	12.1	67.1	32.9	6.1	45.1	54.9
				6.2	18.0328	81.9672	9.2	30.7018	69.2982	7.3	43.1035	56.8965	12.2	64.8045	35.1955	6.2	18.0328	81.9672
				6.3	19	81	11	0	100				12.3	72.0306	27.9694	6.3	19.0476	80.9524
				8	41.4	58.6	15	64.9	35.1							4	26.2595	73.7405
				10	0	100
Reduction in CTCs
Avg			31.8			68.1945			68.5597			48.6879			32.0216			70.692
STD			17.3			21.9618			20.9723			17.1973			3.01475			10.6619
N			2			6			5			3			3			5

## Sheet: By treatment
Figure 7 (related to panel E)
Chemotherapy undergoing (durring draw)	FOLFIRI (with or without avastin)			FOLFOX (with or without avastin)			Capecitabine+Oxaliplatin			Inhibitors (Kinase/EGFR/Checkpoint)
	Patients	TRAIL Liposomes	reduction	Patients	TRAIL Liposomes	reduction	Patients	TRAIL Liposomes	reduction	Patients	TRAIL Liposomes	reduction
	6.1	45.1	54.9	11	0	100	10	0	100	4	26.3	73.7
	6.2	18.0328	81.9672	15	64.9	35.1	13	38.1	61.9	8	41.4	58.6
	6.3	19	81	2	24.1	75.9	5	67.3	32.7	12.2	64.8045	35.1955
	9.1	37.5	62.5	7.1	35.59	64.41				12.3	72.0306	27.9694
	9.2	30.7018	69.2982	7.2	75.2427	24.7573
	1.1	50.9	49.1	7.3	43.1035	56.8965
	1.2	85.5	14.5
	12.1	67.1	32.9
Reduction in CTCs
Avg			55.7707			59.5106			64.8667			48.8662
STD			21.8593			24.975			27.5551			18.269
N			8			6			3			4
