# Supplementary material for: Oxaliplatin resistance in colorectal cancer enhances TRAIL sensitivity via death receptor 4 upregulation and lipid raft localization
Source: eLife. 2021 Aug 3;10:e67750. doi: 10.7554/eLife.67750 (PMC8331188; doi:10.7554/eLife.67750)
Supplement: Figure 7—source data 2. [file elife-67750-fig7-data2.xlsx]

## Sheet: Sheet1
Figure 7 (related to panel F G)
										DR4 coloc with TRAIL liposome correlation				DR4 coloc with Oxaliplatin correlation
Patient	Draw	DR4 COLOC			Oxaliplatin (CTC viability)	TRAIL Liposomes (CTC viability)				Best-fit values				Best-fit values
		Avg	Std	N						Slope	-0.123			Slope	0.05851
1	1				98.1818	50.9091				Y-intercept	11.64			Y-intercept	1.273
	2	0.21275	0.541311	40	98.9091	85.4545				X-intercept	94.6			X-intercept	-21.76
	3	6.53775	5.20923	12						1/slope	-8.128			1/slope	17.09
2	1				95.5357	24.1071
3	1									Std. Error				Std. Error
4	1	0.0113947	0.0372548	38	58.0153	26.2595				Slope	0.01613			Slope	0.01501
5	1	0.524125	0.553881	40	81.448	67.3077				Y-intercept	0.823			Y-intercept	1.328
6	1	0.0190323	0.0719644	31	51.2821	45.1282
	2	9.92553	9.30332	38	75.6546	18.0328				95% Confidence Intervals				95% Confidence Intervals
	3	1.10174	4.53347	27	109.524	19.0476				Slope	-0.1547 to -0.09135			Slope	0.02902 to 0.08799
7	1	1.22381	2.42017	26	69.4915	35.5932				Y-intercept	10.02 to 13.25			Y-intercept	-1.335 to 3.881
	2	1.90486	2.67949	28	53.3981	75.2427				X-intercept	82.77 to 113.6			X-intercept	-131.0 to 15.49
	3	6.58828	5.12372	18	44.8276	43.1034
8	1	1.22381	2.42017	26	98.8636	41.4773				Goodness of Fit				Goodness of Fit
9	1	0.930308	1.66869	39	70.8333	37.5				R squared	0.08893			R squared	0.02484
	2	4.1701	4.71555	40	37.4269	30.7018				Sy.x	9.943			Sy.x	10.29
10	1	12.1887	7.67766	32	118.75	0
	2									Is slope significantly non-zero?				Is slope significantly non-zero?
11	1	1.20491	2.3883	32	109.375	0				F	58.18			F	15.18
12	1	7.14773	6.30755	26	84.8771	67.1078				DFn, DFd	1, 596			DFn, DFd	1, 596
		5.16697	4.44217	36	92.1788	64.8045				P value	<0.0001			P value	0.0001
		0.048175	0.0902887	40	132.184	72.0307				Deviation from zero?	Significant			Deviation from zero?	Significant
13	1	17.9475	8.64419	14	153.333	38.0952
15	1	0.605963	1.41063	27	78.7356	64.9425				Equation	Y = -0.1230*X + 11.64			Equation	Y = 0.05851*X + 1.273
										Data				Data
										Number of X values	599			Number of X values	599
										Maximum number of Y replicates	1			Maximum number of Y replicates	1
										Total number of values	598			Total number of values	598
										Number of missing values	1			Number of missing values	1
