# Supplementary figures and images for: Oxaliplatin resistance in colorectal cancer enhances TRAIL sensitivity via death receptor 4 upregulation and lipid raft localization
Source: eLife journal article supplement (doi:10.7554/elife.67750), 2021-08-02

Figure 2 Source Data

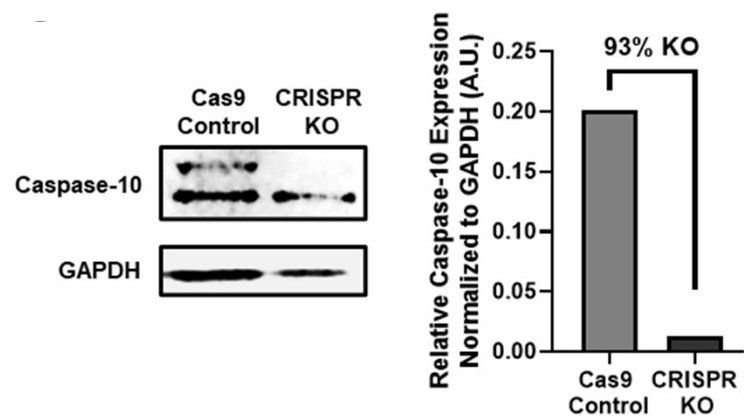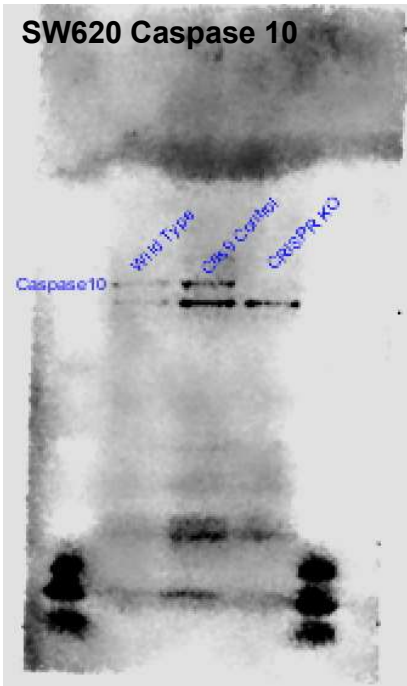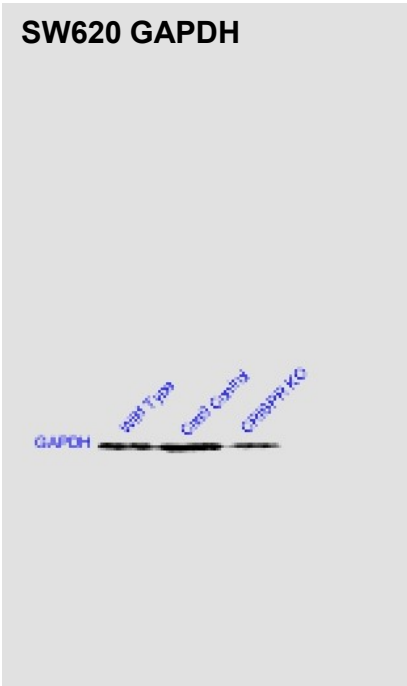

Supplement: fig2-data3 [file Figure 2-source data 3.pdf › Figure 2-source data 3 (blots)/Figure 2-source data 3.pdf]

Figure 3 Source Data

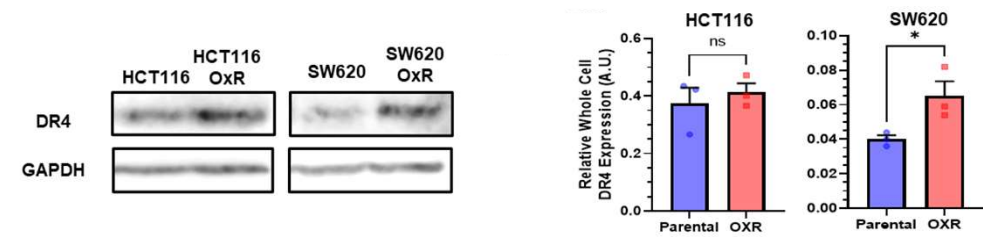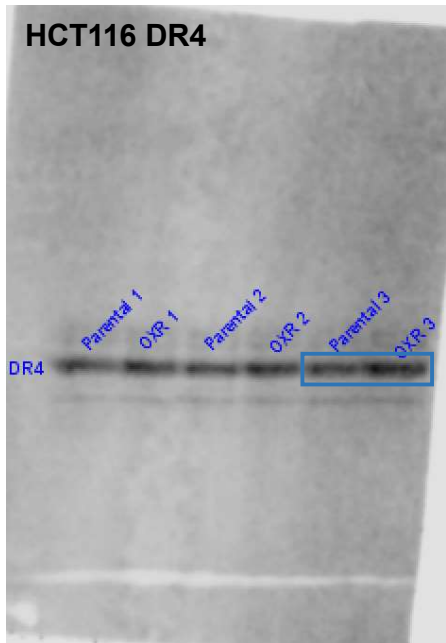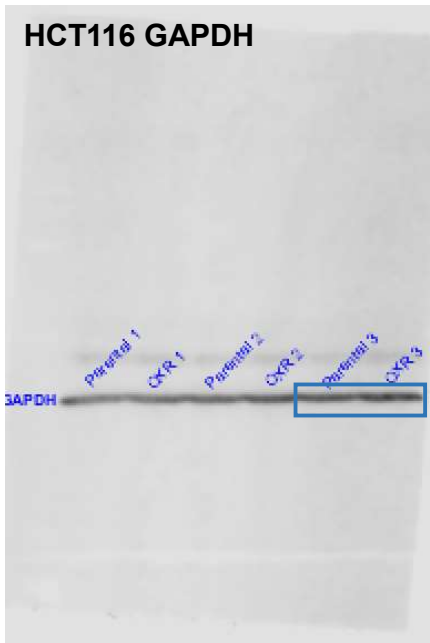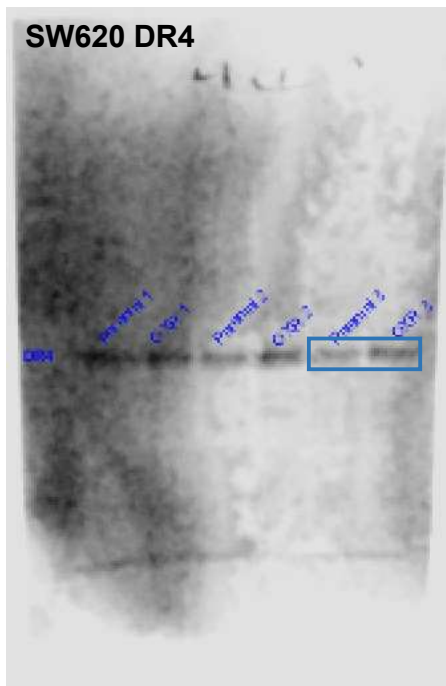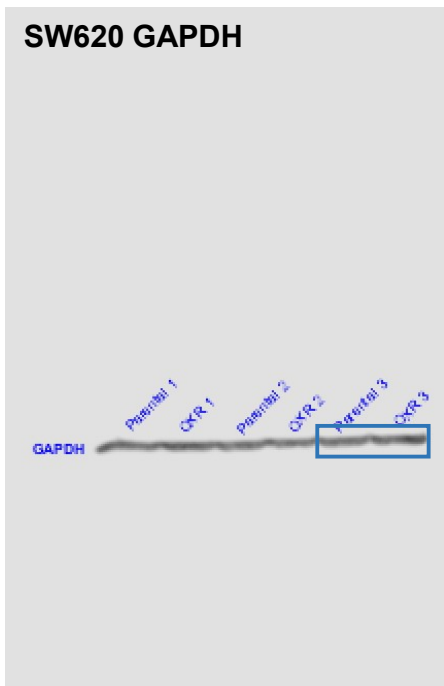

Supplement: fig3-data2 [file elife-67750-fig3-data2-v1.zip]

Figure 3 Supplement 5 Source Data

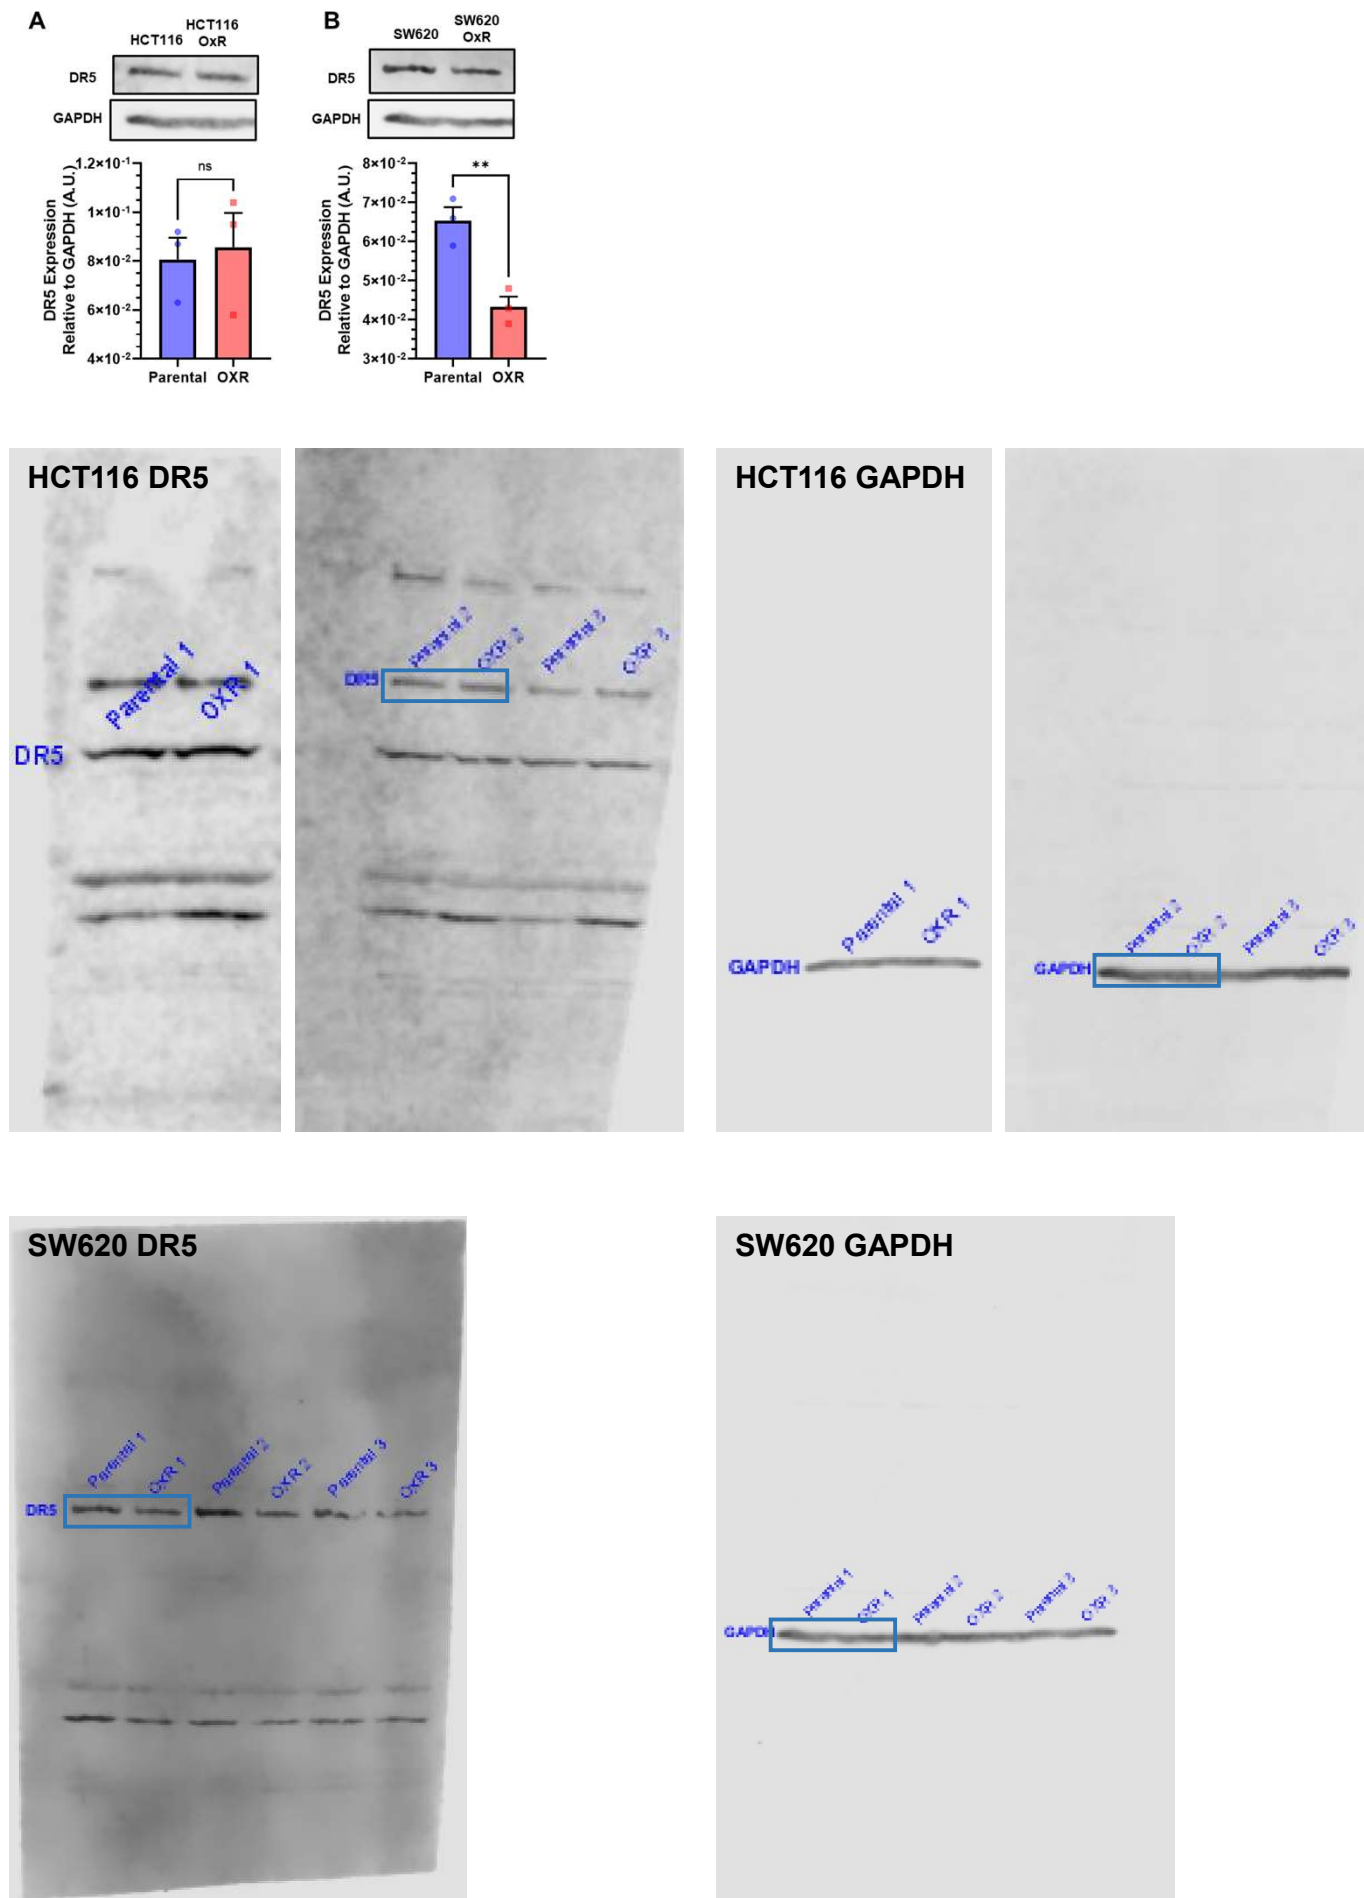

Supplement: fig3-figsupp5-data2 [file Figure 3-figure supplement 5-source data 2.pdf › Figure 3-figure supplement 5-source data 2 (blots)/Figure 3-figure supplement 5-source data 2.pdf]

Figure 4 Source Data

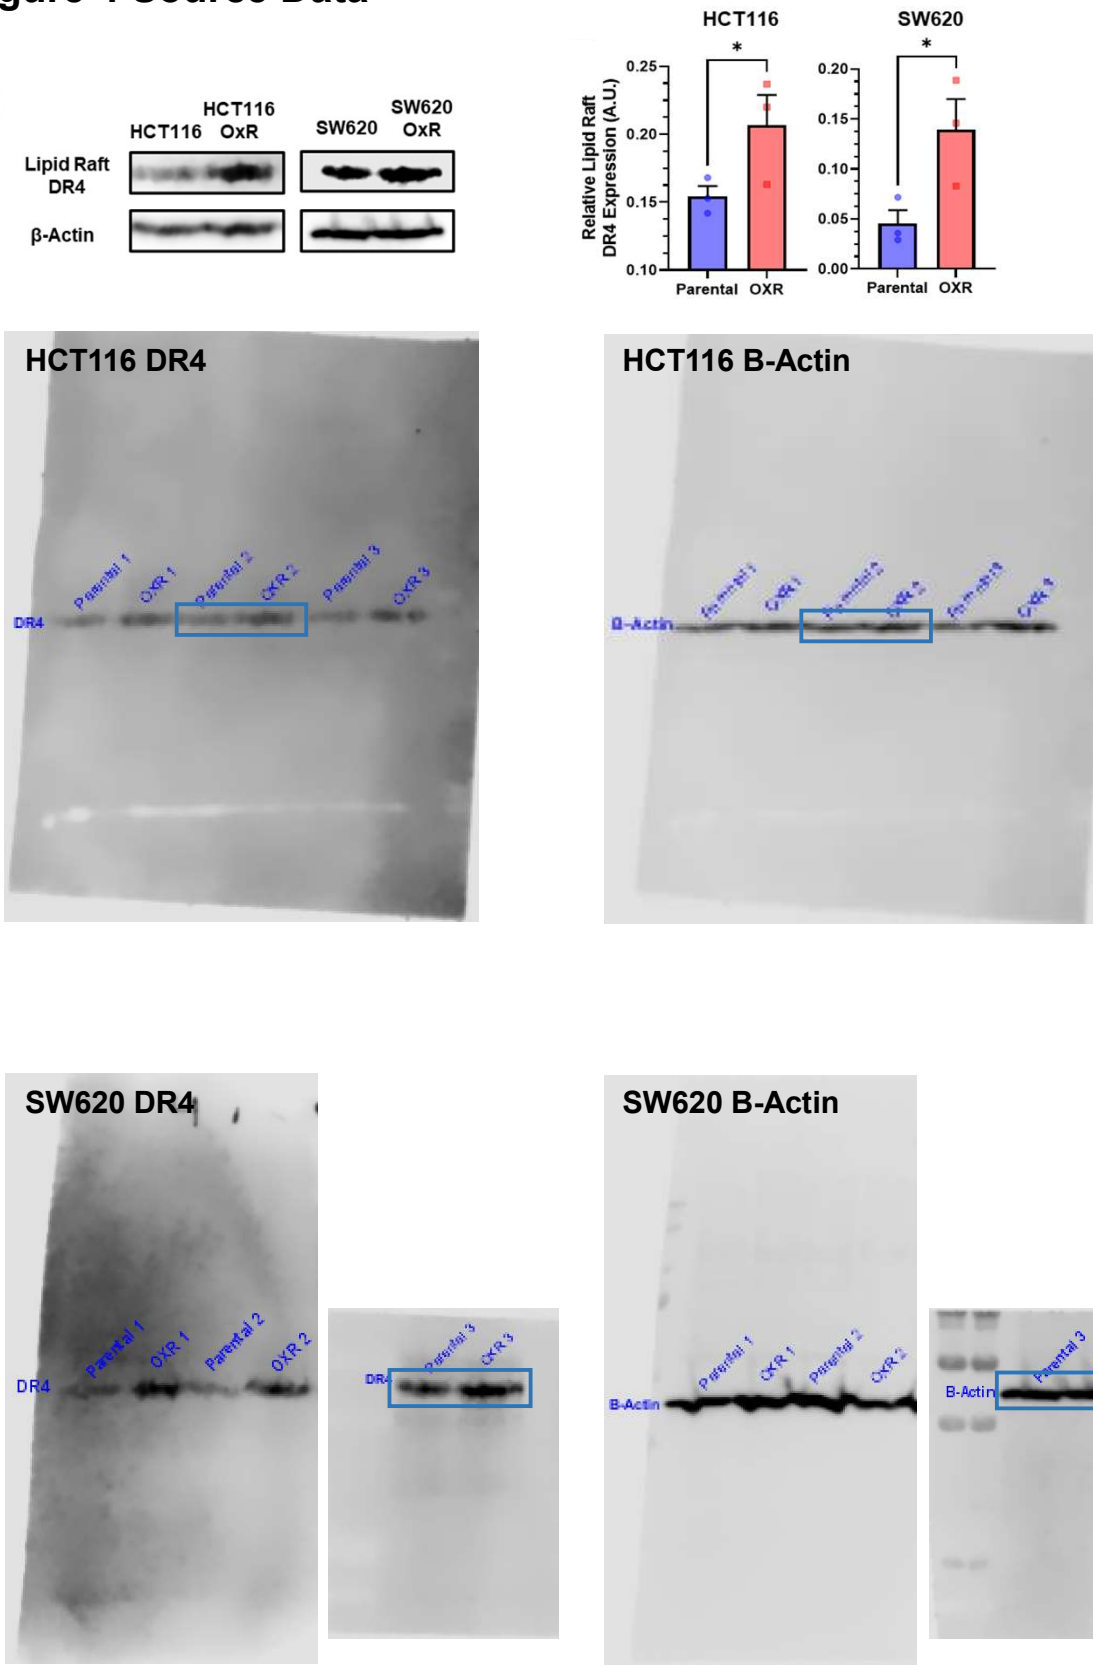

Supplement: fig4-data3 [file elife-67750-fig4-data3-v1.zip]

Figure 4 Supplement 2 Source Data

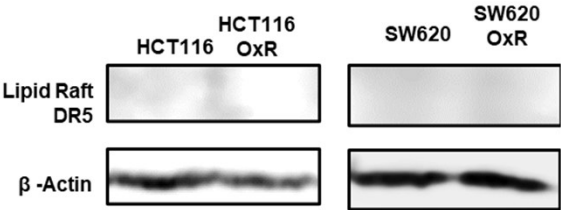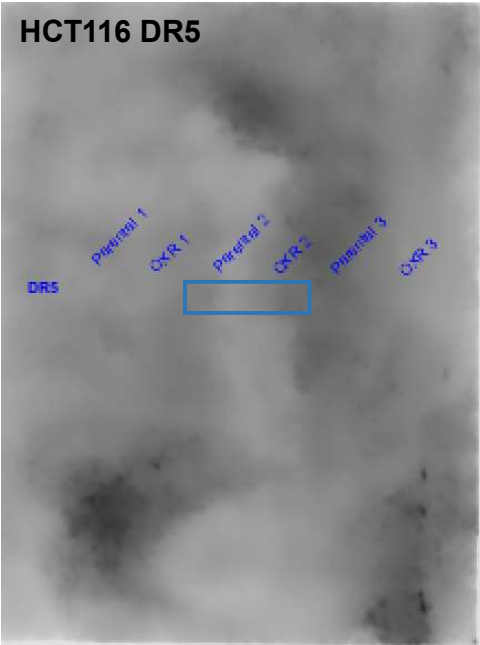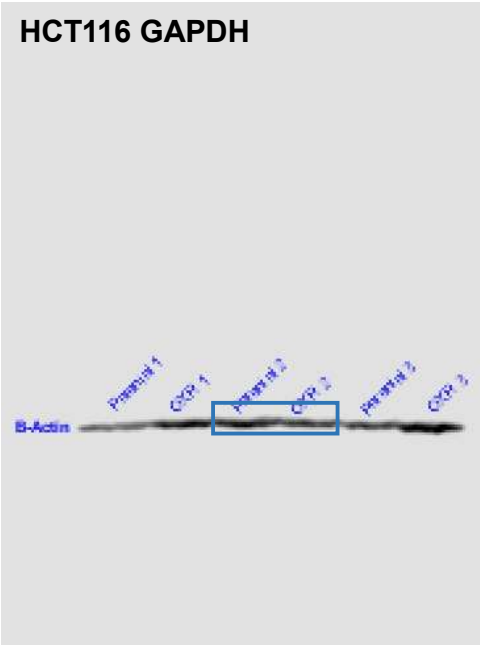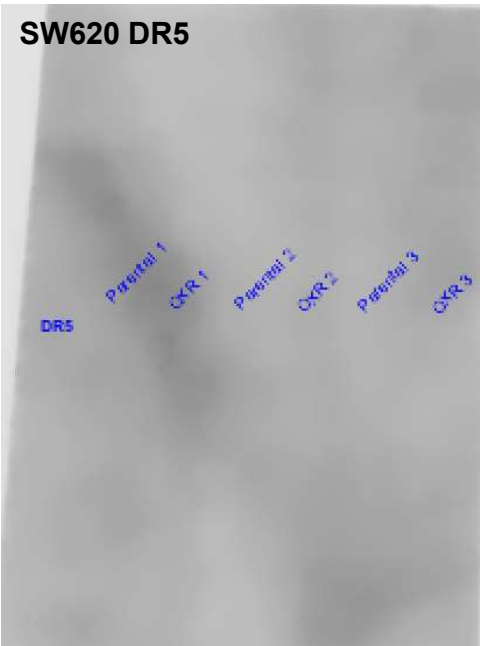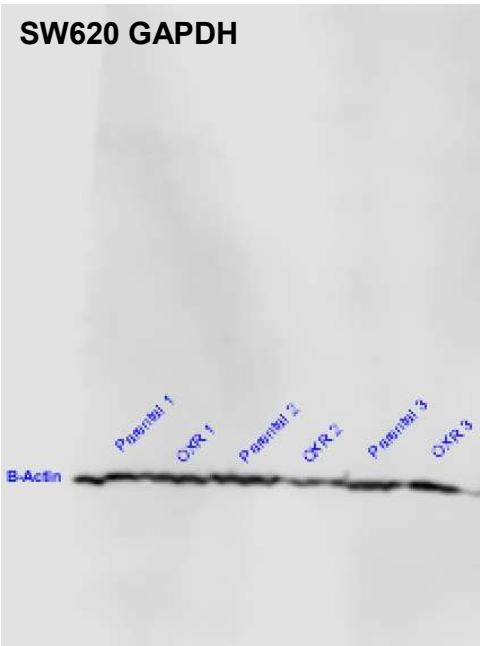

Supplement: fig4-figsupp2-data3 [file elife-67750-fig4-figsupp2-data3-v1.zip]

Figure 6 Source Data

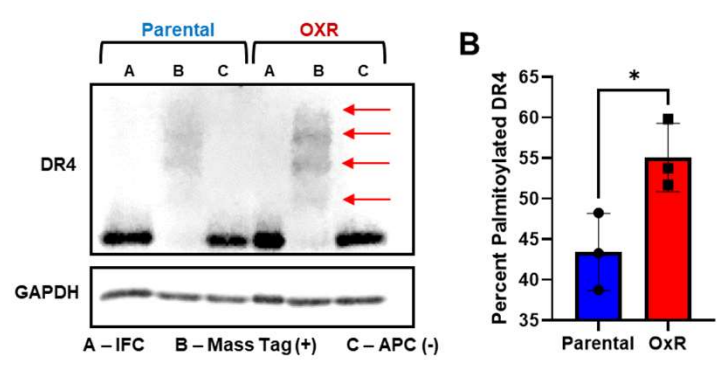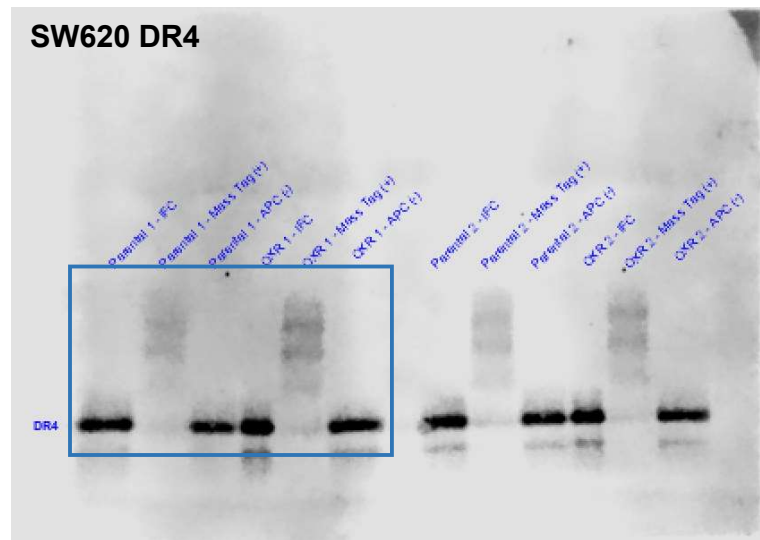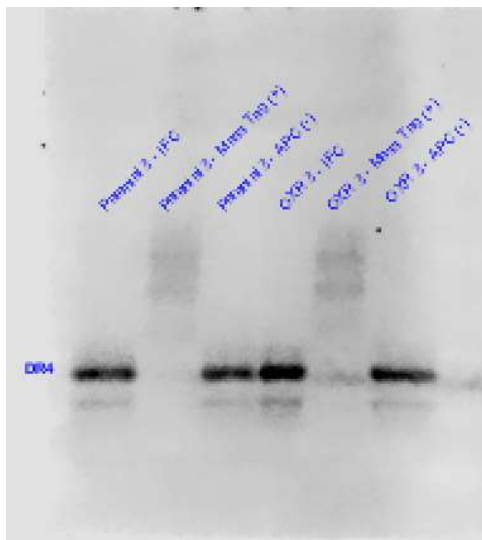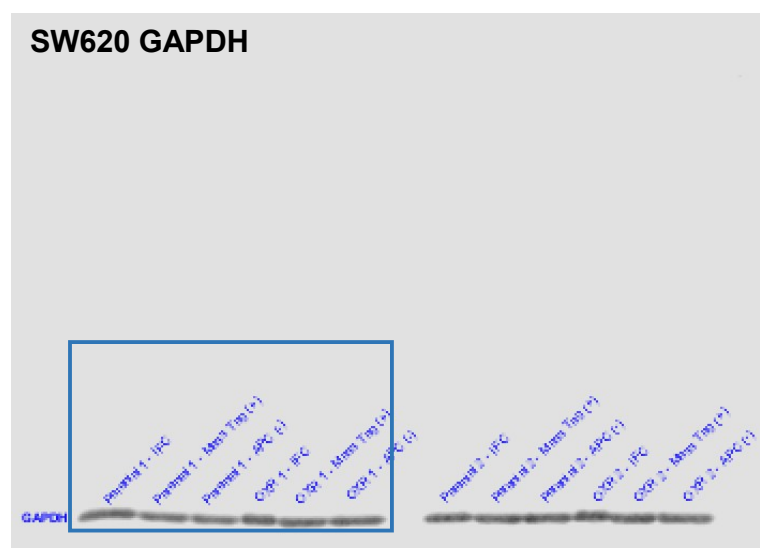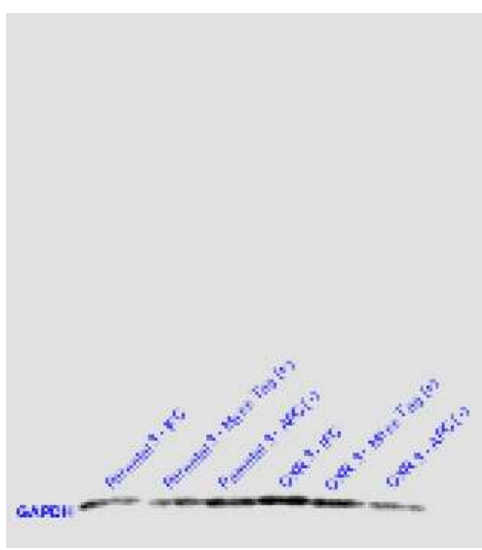

Supplement: fig6-data3 [file Figure 6-source data 3.pdf › Figure 6-source data 3 (blots)/Figure 6-source data 3.pdf]
